# Supplementary material for: Enantiomeric Lignans and Neolignans from Phyllanthus glaucus: Enantioseparation and Their Absolute Configurations
Source: PubMed Central journal article supplement (PMC4850383; doi:10.1038/srep24809), 2016-04-29

# Enantiomeric Lignans and Neolignans from *Phyllanthus glaucus*: Enantioseparation and Their Absolute Configurations

Zhaodi Wu,<sup>1,\*</sup> Yongji Lai,<sup>2,\*</sup> Lei Zhou,<sup>1</sup> Ye Wu,<sup>1</sup> Hucheng Zhu,<sup>1</sup> Zhengxi Hu,<sup>1</sup> Jing Yang,<sup>3</sup> Jinwen Zhang,<sup>4</sup> Jianping Wang,<sup>1</sup> Zengwei Luo,<sup>1</sup> Yongbo Xue,<sup>1</sup> and Yonghui Zhang<sup>1</sup>

<sup>1</sup>Hubei Key Laboratory of Natural Medicinal Chemistry and Resource Evaluation, School of Pharmacy, Tongji Medical College, Huazhong University of Science and Technology, Wuhan 430030, Hubei Province, People's Republic of China.

<sup>2</sup>Department of Pharmacy, the Central Hospital of Wuhan, Wuhan 430014, Hubei Province, People's Republic of China.

<sup>3</sup>State Key Laboratory of Phytochemistry and Plant Resources in West China, Kunming Institute of Botany, Chinese Academy of Sciences, Kunming 650204, People's Republic of China.

<sup>4</sup>Tongji Hospital Affiliated to Tongji Medical College, Huazhong University of Science and Technology, Wuhan 430030, People's Republic of China.

\*These authors contributed equally to the work. Correspondence and requests for materials should be addressed to Y. Z. (zhangyh@mails.tjmu.edu.cn) or Y. X. (yongboxue@mail.hust.edu.cn)

## CONTENTS

|                                                                                                           |    |
|-----------------------------------------------------------------------------------------------------------|----|
| ECD Calculations for compound <b>7R,8R-2</b> at LC-wPBE/6-311++G(2d,p)//B3LYP/6-311++G(2d,p) level.....   | 3  |
| ECD Calculations for compound <b>7R,8R-2</b> at CAM-B3LYP/6-311++G(2d,p)//B3LYP/6-311++G(2d,p) level..... | 12 |
| ECD Calculations for compound <b>7R,8R-2</b> at WB97XD/6-311++G(2d,p)//B3LYP/6-311++G(2d,p) level.....    | 14 |
| HRESIMS, UV, IR, and NMRspectra of <b>1</b> .....                                                         | 17 |
| HRESIMS, UV, IR, and NMRspectra of <b>2</b> .....                                                         | 21 |
| HRESIMS, UV, IR, and NMRspectra of <b>3</b> .....                                                         | 26 |
| HRESIMS, UV, IR, and NMRspectra of <b>4</b> .....                                                         | 30 |
| HRESIMS, UV, IR, and NMRspectra of <b>5</b> .....                                                         | 35 |
| HRESIMS, UV, IR, and NMRspectra of <b>6</b> .....                                                         | 40 |
| HRESIMS, UV, IR, and NMRspectra of <b>7</b> .....                                                         | 45 |
| HRESIMS, UV, IR, and NMRspectra of <b>8</b> .....                                                         | 51 |
| Chiral HPLC separation profiles of <b>1a/1b-8a/8b</b> .....                                               | 56 |

*ECD Calculation*

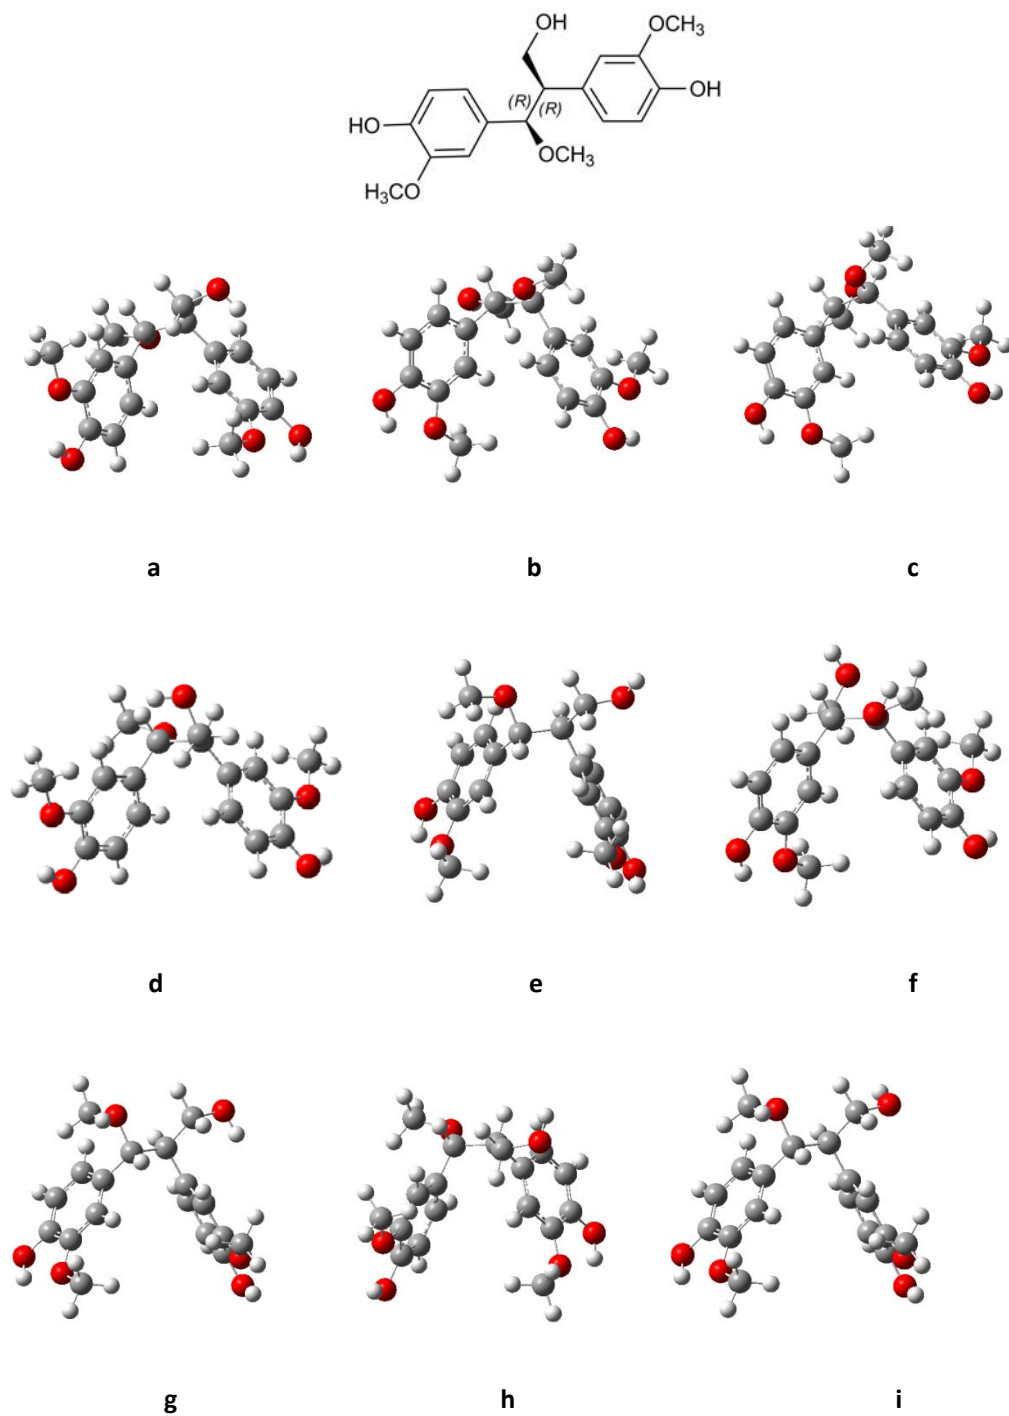

**Figure S1.** Optimized geometries of predominant conformers for compound 7R,8R-2 at the B3LYP/6-311++G(2d,p) level in MeOH using the IEFPCM solvation model.

**Table S1.** Important thermodynamic parameters (a.u.) and Boltzmann distributions of the optimized compound **7R,8R-2** calculated at LC-wPBE/6-311++G(2d,p)//B3LYP/6-311++G(2d,p) level in MeOH with IEFPCM solvation model.

| Conformations | E+ZPE        | G            | %     |
|---------------|--------------|--------------|-------|
| <b>a</b>      | -1149.747078 | -1150.513587 | 1.6   |
| <b>b</b>      | -1149.745583 | -1150.512212 | 0.33  |
| <b>c</b>      | -1149.746992 | -1150.513539 | 1.46  |
| <b>d</b>      | -1149.745532 | -1150.512444 | 0.31  |
| <b>e</b>      | -1149.749154 | -1150.516256 | 14.42 |
| <b>f</b>      | -1149.747124 | -1150.513755 | 1.68  |
| <b>g</b>      | -1149.750597 | -1150.517638 | 66.49 |
| <b>h</b>      | -1149.745795 | -1150.512478 | 0.41  |
| <b>i</b>      | -1149.749077 | -1150.516285 | 13.29 |

*E* is the total electronic energy in MeOH at LC-wPBE/6-311++G(2d,p)//B3LYP/6-311++G(2d,p) level with IEFPCM solvation model, *ZPE* is the zero point energy in MeOH at B3LYP/6-311++G(2d,p) level with IEFPCM solvation model, and *G* is the Gibbs free energy by the sum of *E* and the thermal correction obtained at B3LYP/6-311++G(2d,p) level. %: Boltzmann distributions, using the relative Gibbs free energies as weighting factors.

**Table S2.** Optimized coordinates of **7R,8R-2** in MeOH (Å) at B3LYP/6-311++G(2d,p) level using IEFPCM solvation model.

| <b>a</b> |           |           |           | <b>b</b> |           |           |           |
|----------|-----------|-----------|-----------|----------|-----------|-----------|-----------|
| C        | 1.695498  | 1.24566   | -1.781071 | C        | 1.675083  | 1.305759  | -1.746384 |
| C        | 2.80427   | 1.541562  | -1.006386 | C        | 2.799466  | 1.576151  | -0.985033 |
| C        | 3.191554  | 0.662256  | 0.017627  | C        | 3.203664  | 0.666481  | 0.005268  |
| C        | 2.4616    | -0.496755 | 0.245978  | C        | 2.473705  | -0.496082 | 0.214971  |
| C        | 1.328604  | -0.790433 | -0.523855 | C        | 1.32455   | -0.763933 | -0.540362 |
| C        | 0.959606  | 0.087402  | -1.537985 | C        | 0.93971   | 0.143408  | -1.522205 |
| O        | 3.524426  | 2.678883  | -1.246672 | O        | 3.518926  | 2.717797  | -1.206834 |
| C        | 0.538304  | -2.058741 | -0.242261 | C        | 0.534214  | -2.036236 | -0.277196 |
| C        | -2.901844 | -1.447399 | -0.28392  | C        | -2.885122 | -1.45242  | -0.306374 |
| C        | -1.748658 | -0.96044  | 0.327432  | C        | -1.748502 | -0.9609   | 0.330532  |
| C        | -0.651544 | -1.922162 | 0.753013  | C        | -0.639859 | -1.915356 | 0.74061   |
| C        | -3.928084 | -0.591632 | -0.680905 | C        | -3.919885 | -0.604401 | -0.700271 |
| C        | -3.818266 | 0.770033  | -0.460269 | C        | -3.832285 | 0.75403   | -0.453785 |
| C        | -2.669767 | 1.279674  | 0.165758  | C        | -2.698068 | 1.267027  | 0.194735  |
| C        | -1.648883 | 0.421643  | 0.552194  | C        | -1.670985 | 0.416639  | 0.578957  |

|          |           |           |           |          |           |           |           |
|----------|-----------|-----------|-----------|----------|-----------|-----------|-----------|
| O        | -1.188004 | -1.762871 | 3.152069  | O        | -1.172235 | -1.866062 | 3.081661  |
| C        | -0.147378 | -1.652868 | 2.177396  | C        | -0.103245 | -1.664014 | 2.149827  |
| O        | -4.826409 | 1.611198  | -0.842955 | O        | -4.848235 | 1.589682  | -0.833245 |
| O        | 0.000273  | -2.634262 | -1.431116 | O        | -0.024363 | -2.581589 | -1.470112 |
| C        | 0.976848  | -3.246757 | -2.26403  | C        | 0.937241  | -3.17661  | -2.332145 |
| O        | 4.308728  | 1.055428  | 0.703297  | O        | 4.336188  | 1.036132  | 0.679125  |
| C        | 4.780716  | 0.227515  | 1.767643  | C        | 4.828909  | 0.17445   | 1.706484  |
| O        | -2.680308 | 2.638176  | 0.333267  | O        | -2.729601 | 2.623488  | 0.3878    |
| C        | -1.579351 | 3.252129  | 1.005812  | C        | -1.647044 | 3.237786  | 1.088065  |
| H        | 1.413473  | 1.927916  | -2.574125 | H        | 1.380463  | 2.011205  | -2.514184 |
| H        | 2.774711  | -1.186513 | 1.019148  | H        | 2.799177  | -1.208825 | 0.961765  |
| H        | 0.098804  | -0.136018 | -2.153888 | H        | 0.066306  | -0.059185 | -2.127321 |
| H        | 4.259803  | 2.706777  | -0.616429 | H        | 4.266546  | 2.725404  | -0.590605 |
| H        | 1.227237  | -2.785606 | 0.210731  | H        | 1.227221  | -2.77587  | 0.1471    |
| H        | -3.005869 | -2.511568 | -0.457369 | H        | -2.972127 | -2.514467 | -0.501148 |
| H        | -1.095843 | -2.921461 | 0.771855  | H        | -1.075356 | -2.918901 | 0.758298  |
| H        | -4.821886 | -0.976854 | -1.156849 | H        | -4.802113 | -0.994001 | -1.194105 |
| H        | -0.765368 | 0.829455  | 1.021838  | H        | -0.803412 | 0.827273  | 1.074522  |
| H        | -1.876158 | -1.122731 | 2.928632  | H        | -0.841772 | -1.672538 | 3.966455  |
| H        | 0.337469  | -0.67477  | 2.253365  | H        | 0.300684  | -0.65257  | 2.251537  |
| H        | 0.590632  | -2.407539 | 2.453459  | H        | 0.708723  | -2.369094 | 2.358388  |
| H        | -4.571194 | 2.51388   | -0.600522 | H        | -4.608613 | 2.489812  | -0.567007 |
| H        | 1.710025  | -2.521781 | -2.63083  | H        | 1.665777  | -2.444726 | -2.694552 |
| H        | 1.503806  | -4.044585 | -1.727355 | H        | 1.471499  | -3.987086 | -1.822196 |
| H        | 0.444604  | -3.676055 | -3.111933 | H        | 0.390591  | -3.58605  | -3.180737 |
| H        | 5.656689  | 0.730078  | 2.16965   | H        | 5.715498  | 0.661803  | 2.103954  |
| H        | 4.023345  | 0.128323  | 2.548467  | H        | 4.08902   | 0.053329  | 2.500874  |
| H        | 5.062468  | -0.760723 | 1.397231  | H        | 5.098697  | -0.802695 | 1.299525  |
| H        | -1.482868 | 2.867876  | 2.023887  | H        | -1.559028 | 2.834334  | 2.09955   |
| H        | -0.648044 | 3.090289  | 0.458974  | H        | -0.705656 | 3.099553  | 0.551863  |
| H        | -1.804842 | 4.315082  | 1.035915  | H        | -1.88684  | 4.297028  | 1.13669   |
| <b>c</b> |           |           |           | <b>d</b> |           |           |           |
| C        | 1.482045  | 1.444303  | -1.779465 | C        | -1.814898 | 1.961531  | 1.156591  |
| C        | 2.61233   | 1.751249  | -1.040989 | C        | -3.091679 | 1.880552  | 0.625962  |
| C        | 3.077911  | 0.845913  | -0.074167 | C        | -3.537934 | 0.671507  | 0.070664  |
| C        | 2.402482  | -0.349053 | 0.135928  | C        | -2.695271 | -0.432899 | 0.054333  |
| C        | 1.249196  | -0.656349 | -0.598228 | C        | -1.395356 | -0.350043 | 0.569379  |
| C        | 0.802477  | 0.248071  | -1.556298 | C        | -0.97124  | 0.853668  | 1.125458  |
| O        | 3.277639  | 2.925974  | -1.262788 | O        | -3.916255 | 2.970855  | 0.657971  |
| C        | 0.528827  | -1.968754 | -0.33779  | C        | -0.489591 | -1.569161 | 0.525943  |
| C        | -2.932596 | -1.545927 | -0.161481 | C        | 1.234458  | 0.722924  | -1.380693 |
| C        | -1.772852 | -1.013139 | 0.396848  | C        | 1.510597  | -0.460556 | -0.6983   |
| C        | -0.605433 | -1.924753 | 0.729364  | C        | 0.533718  | -1.621861 | -0.645454 |

|          |           |           |           |          |           |           |           |
|----------|-----------|-----------|-----------|----------|-----------|-----------|-----------|
| C        | -4.027578 | -0.738356 | -0.465717 | C        | 2.16453   | 1.761543  | -1.426083 |
| C        | -3.979584 | 0.619743  | -0.205784 | C        | 3.3836    | 1.632797  | -0.785289 |
| C        | -2.823523 | 1.174402  | 0.364673  | C        | 3.680513  | 0.447301  | -0.094246 |
| C        | -1.734712 | 0.364897  | 0.658944  | C        | 2.753061  | -0.584245 | -0.059296 |
| O        | 0.86483   | -2.692208 | 2.479039  | O        | -0.74318  | -3.16034  | -2.098067 |
| C        | -0.061565 | -1.653573 | 2.13332   | C        | -0.148423 | -1.858705 | -2.003098 |
| O        | -5.054766 | 1.414324  | -0.498479 | O        | 4.295413  | 2.652471  | -0.830905 |
| O        | -0.059104 | -2.508191 | -1.521471 | O        | 0.270685  | -1.720426 | 1.725441  |
| C        | 0.886007  | -3.062899 | -2.426572 | C        | -0.503677 | -2.121108 | 2.848489  |
| O        | 4.20925   | 1.254118  | 0.580033  | O        | -4.821276 | 0.709685  | -0.402898 |
| C        | 4.764463  | 0.395386  | 1.577546  | C        | -5.374277 | -0.479705 | -0.968892 |
| O        | -2.898106 | 2.525393  | 0.578511  | O        | 4.917485  | 0.434569  | 0.493245  |
| C        | -1.792733 | 3.180332  | 1.203006  | C        | 5.312512  | -0.728522 | 1.22248   |
| H        | 1.139774  | 2.147519  | -2.529448 | H        | -1.488057 | 2.897976  | 1.592726  |
| H        | 2.769557  | -1.058335 | 0.866303  | H        | -3.055443 | -1.373256 | -0.342085 |
| H        | -0.075781 | 0.016041  | -2.143743 | H        | 0.021884  | 0.928795  | 1.547143  |
| H        | 4.039185  | 2.956589  | -0.664705 | H        | -4.761379 | 2.72024   | 0.255924  |
| H        | 1.266055  | -2.685179 | 0.041281  | H        | -1.126662 | -2.457084 | 0.41513   |
| H        | -2.988643 | -2.60831  | -0.36525  | H        | 0.28597   | 0.859056  | -1.883427 |
| H        | -0.994641 | -2.946965 | 0.744718  | H        | 1.116703  | -2.526217 | -0.447795 |
| H        | -4.926402 | -1.159319 | -0.900263 | H        | 1.946101  | 2.679169  | -1.959194 |
| H        | -0.848223 | 0.808687  | 1.087286  | H        | 2.983273  | -1.499347 | 0.468355  |
| H        | 1.204353  | -2.512774 | 3.363344  | H        | -1.666755 | -3.113186 | -1.830982 |
| H        | -0.898517 | -1.644195 | 2.838515  | H        | 0.611986  | -1.81596  | -2.783921 |
| H        | 0.435991  | -0.680561 | 2.185433  | H        | -0.892331 | -1.089847 | -2.224654 |
| H        | -4.834501 | 2.32143   | -0.239216 | H        | 5.077226  | 2.376508  | -0.329742 |
| H        | 1.581435  | -2.305443 | -2.802024 | H        | -1.255887 | -1.370714 | 3.111264  |
| H        | 1.460084  | -3.866351 | -1.949856 | H        | -1.007016 | -3.076269 | 2.656564  |
| H        | 0.321527  | -3.473799 | -3.262957 | H        | 0.18674   | -2.241546 | 3.682478  |
| H        | 5.64055   | 0.912068  | 1.961069  | H        | -6.383909 | -0.220926 | -1.277361 |
| H        | 4.051641  | 0.228982  | 2.38832   | H        | -4.79635  | -0.802989 | -1.837674 |
| H        | 5.062798  | -0.562326 | 1.145116  | H        | -5.411037 | -1.282382 | -0.228816 |
| H        | -1.608489 | 2.768805  | 2.19811   | H        | 4.634903  | -0.912503 | 2.059216  |
| H        | -0.890759 | 3.092658  | 0.593476  | H        | 5.342805  | -1.605343 | 0.571636  |
| H        | -2.075912 | 4.226533  | 1.286901  | H        | 6.31039   | -0.518781 | 1.599246  |
| <b>e</b> |           |           |           | <b>f</b> |           |           |           |
| C        | -3.226225 | 0.228304  | -1.582693 | C        | 1.478937  | 1.436255  | -1.787765 |
| C        | -3.438877 | -0.961361 | -0.904963 | C        | 2.601564  | 1.753347  | -1.041755 |
| C        | -2.700184 | -1.243489 | 0.254175  | C        | 3.064449  | 0.855481  | -0.066775 |
| C        | -1.75976  | -0.329518 | 0.713971  | C        | 2.394205  | -0.342455 | 0.14372   |
| C        | -1.535678 | 0.86784   | 0.027364  | C        | 1.248236  | -0.659605 | -0.597581 |
| C        | -2.278713 | 1.137271  | -1.118617 | C        | 0.80417   | 0.237592  | -1.563716 |
| O        | -4.370536 | -1.851313 | -1.363201 | O        | 3.261888  | 2.930601  | -1.264171 |

|          |           |           |           |          |           |           |           |
|----------|-----------|-----------|-----------|----------|-----------|-----------|-----------|
| C        | -0.506299 | 1.862986  | 0.53823   | C        | 0.532967  | -1.974742 | -0.336953 |
| C        | 1.431881  | 0.103043  | -1.901527 | C        | -2.932082 | -1.532141 | -0.184364 |
| C        | 1.41745   | 0.682955  | -0.637934 | C        | -1.771254 | -1.011772 | 0.383663  |
| C        | 0.716498  | 2.011235  | -0.402394 | C        | -0.6115   | -1.932285 | 0.71704   |
| C        | 2.072937  | -1.115129 | -2.130922 | C        | -4.020216 | -0.714729 | -0.486863 |
| C        | 2.710457  | -1.767974 | -1.092062 | C        | -3.964151 | 0.640817  | -0.215327 |
| C        | 2.708811  | -1.195317 | 0.190776  | C        | -2.807063 | 1.182886  | 0.365248  |
| C        | 2.069202  | 0.016425  | 0.4101    | C        | -1.725194 | 0.36369   | 0.658203  |
| O        | 2.719263  | 3.271031  | -0.842012 | O        | 0.88493   | -2.648795 | 2.560216  |
| C        | 1.674293  | 3.084865  | 0.123072  | C        | -0.076049 | -1.677173 | 2.135471  |
| O        | 3.340968  | -2.962376 | -1.31336  | O        | -5.032426 | 1.445061  | -0.506363 |
| O        | -1.072072 | 3.169273  | 0.692443  | O        | -0.036821 | -2.526178 | -1.524193 |
| C        | -2.002324 | 3.270922  | 1.762667  | C        | 0.923679  | -3.073785 | -2.41764  |
| O        | -3.006332 | -2.442435 | 0.838728  | O        | 4.188187  | 1.272994  | 0.594168  |
| C        | -2.319435 | -2.810522 | 2.036066  | C        | 4.73806   | 0.424063  | 1.603105  |
| O        | 3.373585  | -1.933081 | 1.133119  | O        | -2.87384  | 2.532332  | 0.590164  |
| C        | 3.448878  | -1.427943 | 2.466971  | C        | -1.765171 | 3.175688  | 1.220851  |
| H        | -3.807894 | 0.434766  | -2.47318  | H        | 1.13859   | 2.133738  | -2.543935 |
| H        | -1.1918   | -0.540564 | 1.610363  | H        | 2.761492  | -1.045917 | 0.879564  |
| H        | -2.130407 | 2.066491  | -1.654822 | H        | -0.068035 | -0.002109 | -2.157116 |
| H        | -4.379814 | -2.611695 | -0.762837 | H        | 4.018494  | 2.968683  | -0.660218 |
| H        | -0.154168 | 1.520319  | 1.520616  | H        | 1.271127  | -2.683735 | 0.055837  |
| H        | 0.937265  | 0.601807  | -2.726498 | H        | -2.994105 | -2.592325 | -0.397932 |
| H        | 0.338147  | 2.363072  | -1.366653 | H        | -1.010865 | -2.952111 | 0.714966  |
| H        | 2.082337  | -1.562067 | -3.117845 | H        | -4.919634 | -1.125905 | -0.929474 |
| H        | 2.078732  | 0.448831  | 1.401484  | H        | -0.838211 | 0.79838   | 1.094873  |
| H        | 3.26441   | 4.011704  | -0.553225 | H        | 0.44122   | -3.50155  | 2.645084  |
| H        | 2.099892  | 2.778622  | 1.086117  | H        | -0.919634 | -1.647135 | 2.831832  |
| H        | 1.129156  | 4.017094  | 0.272437  | H        | 0.439184  | -0.718641 | 2.198512  |
| H        | 3.727984  | -3.255741 | -0.475109 | H        | -4.806872 | 2.348762  | -0.239718 |
| H        | -2.875675 | 2.630783  | 1.603221  | H        | 1.614525  | -2.310088 | -2.788635 |
| H        | -1.533698 | 3.000859  | 2.716449  | H        | 1.501628  | -3.869083 | -1.931983 |
| H        | -2.32412  | 4.310795  | 1.804077  | H        | 0.37228   | -3.493912 | -3.25812  |
| H        | -2.718869 | -3.780174 | 2.32206   | H        | 5.607637  | 0.948028  | 1.991517  |
| H        | -1.244959 | -2.893784 | 1.858847  | H        | 4.018121  | 0.25945   | 2.407878  |
| H        | -2.50868  | -2.086183 | 2.831578  | H        | 5.045764  | -0.534989 | 1.180312  |
| H        | 3.962201  | -0.464015 | 2.490005  | H        | -1.586114 | 2.757242  | 2.213989  |
| H        | 2.452322  | -1.326918 | 2.902876  | H        | -0.862539 | 3.084878  | 0.612757  |
| H        | 4.021165  | -2.160345 | 3.030629  | H        | -2.040933 | 4.223421  | 1.310061  |
| <b>g</b> |           |           |           | <b>h</b> |           |           |           |
| C        | -3.23784  | 0.216766  | -1.596305 | C        | -1.677508 | -1.281765 | -1.765657 |
| C        | -3.447139 | -0.976161 | -0.923252 | C        | -2.790594 | -1.564816 | -0.992367 |
| C        | -2.71113  | -1.258665 | 0.237543  | C        | -3.184236 | -0.668065 | 0.013866  |

|   |           |           |           |   |           |           |           |
|---|-----------|-----------|-----------|---|-----------|-----------|-----------|
| C | -1.776718 | -0.341741 | 0.703656  | C | -2.455825 | 0.494932  | 0.226711  |
| C | -1.556115 | 0.859137  | 0.021855  | C | -1.31836  | 0.77571   | -0.541452 |
| C | -2.296282 | 1.128728  | -1.126068 | C | -0.943297 | -0.119369 | -1.538196 |
| O | -4.372851 | -1.86894  | -1.387667 | O | -3.509049 | -2.706372 | -1.217411 |
| C | -0.530866 | 1.85514   | 0.538364  | C | -0.529664 | 2.048447  | -0.276382 |
| C | 1.487092  | 0.143143  | -1.907369 | C | 2.892602  | 1.431779  | -0.311843 |
| C | 1.415922  | 0.697353  | -0.633052 | C | 1.748675  | 0.955919  | 0.323804  |
| C | 0.691578  | 2.013266  | -0.398138 | C | 0.652499  | 1.923761  | 0.732175  |
| C | 2.158855  | -1.058178 | -2.136895 | C | 3.917243  | 0.569938  | -0.702517 |
| C | 2.773223  | -1.718633 | -1.088951 | C | 3.811551  | -0.786651 | -0.453726 |
| C | 2.719927  | -1.170049 | 0.204068  | C | 2.669714  | -1.284064 | 0.19413   |
| C | 2.050069  | 0.0249    | 0.424367  | C | 1.653063  | -0.420142 | 0.575495  |
| O | 2.744235  | 3.336478  | -0.755888 | O | 1.142399  | 1.779927  | 3.152041  |
| C | 1.650945  | 3.092025  | 0.133263  | C | 0.122579  | 1.691029  | 2.154656  |
| O | 3.432666  | -2.89524  | -1.310833 | O | 4.816949  | -1.635997 | -0.830149 |
| O | -1.095461 | 3.161467  | 0.695046  | O | 0.017888  | 2.603707  | -1.470245 |
| C | -2.029159 | 3.260878  | 1.762629  | C | -0.952087 | 3.202754  | -2.320322 |
| O | -3.013745 | -2.460825 | 0.817097  | O | -4.305743 | -1.049702 | 0.699143  |
| C | -2.32999  | -2.829387 | 2.016111  | C | -4.786075 | -0.20268  | 1.744464  |
| O | 3.368158  | -1.9123   | 1.152234  | O | 2.68412   | -2.640233 | 0.389453  |
| C | 3.399857  | -1.428246 | 2.496255  | C | 1.591903  | -3.240361 | 1.087248  |
| H | -3.817498 | 0.423426  | -2.488045 | H | -1.390641 | -1.977501 | -2.545157 |
| H | -1.211541 | -0.552774 | 1.601818  | H | -2.773944 | 1.197935  | 0.985774  |
| H | -2.150519 | 2.060408  | -1.658717 | H | -0.07867  | 0.093373  | -2.152425 |
| H | -4.380894 | -2.631256 | -0.789731 | H | -4.247735 | -2.724096 | -0.590692 |
| H | -0.180257 | 1.510126  | 1.520482  | H | -1.22154  | 2.783533  | 0.158087  |
| H | 1.010131  | 0.648168  | -2.738839 | H | 2.99312   | 2.492251  | -0.509113 |
| H | 0.315726  | 2.362769  | -1.364058 | H | 1.096131  | 2.925489  | 0.728603  |
| H | 2.210432  | -1.485837 | -3.130906 | H | 4.805016  | 0.947194  | -1.195966 |
| H | 2.017086  | 0.438049  | 1.423392  | H | 0.779794  | -0.818728 | 1.070854  |
| H | 3.206334  | 2.500843  | -0.902414 | H | 1.511305  | 2.671444  | 3.134834  |
| H | 2.024536  | 2.813465  | 1.126155  | H | -0.306118 | 0.695212  | 2.26548   |
| H | 1.126989  | 4.039768  | 0.226481  | H | -0.671768 | 2.414873  | 2.367128  |
| H | 3.798399  | -3.198257 | -0.466327 | H | 4.565013  | -2.532657 | -0.563479 |
| H | -2.902174 | 2.621494  | 1.598539  | H | -1.682096 | 2.471863  | -2.681649 |
| H | -1.563633 | 2.988132  | 2.717133  | H | -1.483677 | 4.008597  | -1.800362 |
| H | -2.350553 | 4.300773  | 1.805654  | H | -0.413249 | 3.619099  | -3.17054  |
| H | -2.725554 | -3.802071 | 2.29712   | H | -5.665033 | -0.698102 | 2.148837  |
| H | -1.254353 | -2.906437 | 1.843199  | H | -4.034846 | -0.088931 | 2.529227  |
| H | -2.526455 | -2.108744 | 2.813224  | H | -5.065191 | 0.778516  | 1.353852  |
| H | 3.898243  | -0.457724 | 2.548376  | H | 1.507027  | -2.835847 | 2.098531  |
| H | 2.390563  | -1.349278 | 2.906281  | H | 0.653754  | -3.089666 | 0.548804  |
| H | 3.96761   | -2.161826 | 3.062774  | H | 1.817726  | -4.30264  | 1.136211  |



| i |           |           |           |  |  |  |  |
|---|-----------|-----------|-----------|--|--|--|--|
| C | -3.18743  | 0.20692   | -1.618757 |  |  |  |  |
| C | -3.414513 | -0.974373 | -0.931051 |  |  |  |  |
| C | -2.699755 | -1.242461 | 0.24625   |  |  |  |  |
| C | -1.76795  | -0.32351  | 0.713565  |  |  |  |  |
| C | -1.529184 | 0.865352  | 0.017191  |  |  |  |  |
| C | -2.249156 | 1.121231  | -1.14653  |  |  |  |  |
| O | -4.337584 | -1.869287 | -1.396853 |  |  |  |  |
| C | -0.511828 | 1.866839  | 0.538333  |  |  |  |  |
| C | 1.470763  | 0.137388  | -1.899389 |  |  |  |  |
| C | 1.427944  | 0.690563  | -0.62434  |  |  |  |  |
| C | 0.730747  | 2.017167  | -0.376939 |  |  |  |  |
| C | 2.113266  | -1.078048 | -2.139687 |  |  |  |  |
| C | 2.724177  | -1.754962 | -1.100374 |  |  |  |  |
| C | 2.694647  | -1.209276 | 0.193952  |  |  |  |  |
| C | 2.054111  | -0.000087 | 0.423894  |  |  |  |  |
| O | 2.810534  | 3.333608  | -0.664967 |  |  |  |  |
| C | 1.6895    | 3.0803    | 0.189211  |  |  |  |  |
| O | 3.355737  | -2.946693 | -1.332062 |  |  |  |  |
| O | -1.084547 | 3.173117  | 0.669472  |  |  |  |  |
| C | -2.027439 | 3.284905  | 1.727523  |  |  |  |  |
| O | -3.01941  | -2.433327 | 0.840008  |  |  |  |  |
| C | -2.358846 | -2.785628 | 2.056789  |  |  |  |  |
| O | 3.335088  | -1.968932 | 1.135442  |  |  |  |  |
| C | 3.389316  | -1.487877 | 2.479299  |  |  |  |  |
| H | -3.751127 | 0.402902  | -2.523061 |  |  |  |  |
| H | -1.219274 | -0.523499 | 1.624403  |  |  |  |  |
| H | -2.090197 | 2.044215  | -1.690393 |  |  |  |  |
| H | -4.359961 | -2.621918 | -0.787141 |  |  |  |  |
| H | -0.177557 | 1.533351  | 1.530225  |  |  |  |  |
| H | 0.996234  | 0.654523  | -2.724935 |  |  |  |  |
| H | 0.366102  | 2.386444  | -1.341441 |  |  |  |  |
| H | 2.144421  | -1.503983 | -3.135404 |  |  |  |  |
| H | 2.042042  | 0.410368  | 1.424474  |  |  |  |  |
| H | 2.491345  | 3.766093  | -1.466063 |  |  |  |  |
| H | 2.114586  | 2.743107  | 1.136499  |  |  |  |  |
| H | 1.140903  | 4.00353   | 0.377597  |  |  |  |  |
| H | 3.723001  | -3.25864  | -0.491622 |  |  |  |  |
| H | -2.894079 | 2.635487  | 1.568838  |  |  |  |  |
| H | -1.567475 | 3.034032  | 2.690692  |  |  |  |  |
| H | -2.357635 | 4.322759  | 1.748448  |  |  |  |  |
| H | -2.765514 | -3.750893 | 2.347376  |  |  |  |  |
| H | -1.280904 | -2.872263 | 1.903935  |  |  |  |  |

|   |           |           |          |  |  |  |  |
|---|-----------|-----------|----------|--|--|--|--|
| H | -2.564307 | -2.050279 | 2.838058 |  |  |  |  |
| H | 3.907403  | -0.527497 | 2.528403 |  |  |  |  |
| H | 2.38579   | -1.388883 | 2.899327 |  |  |  |  |
| H | 3.947449  | -2.23349  | 3.039807 |  |  |  |  |

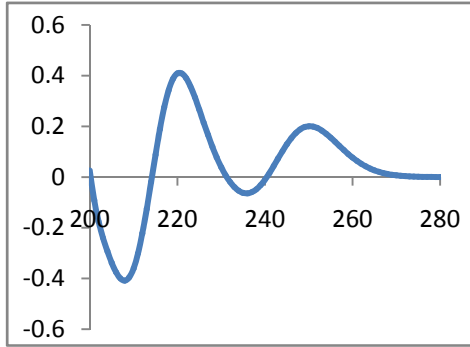

(a)

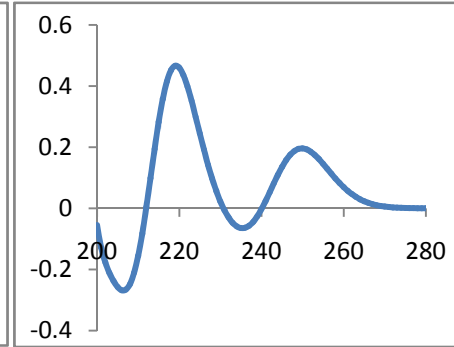

(b)

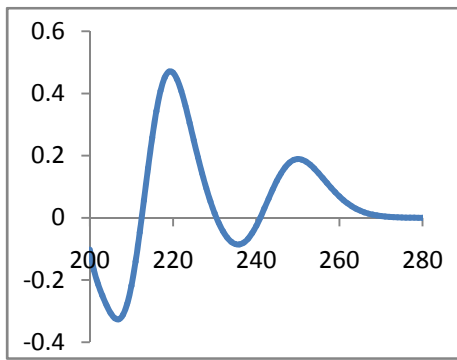

(c)

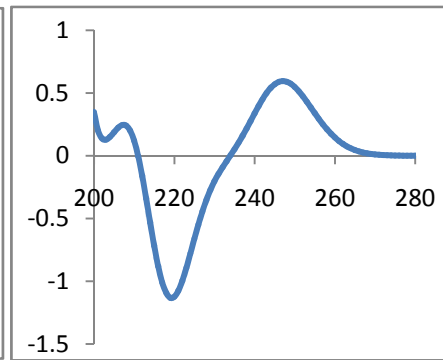

(d)

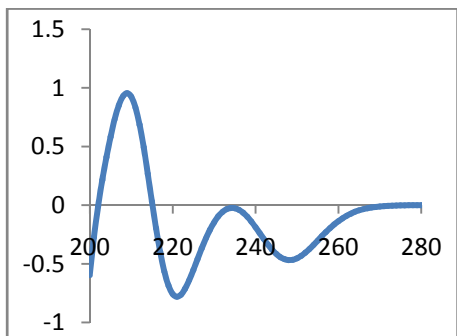

(e)

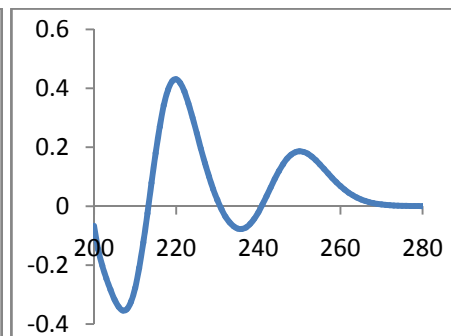

(f)

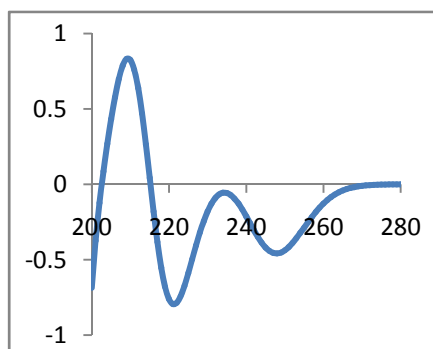

(g)

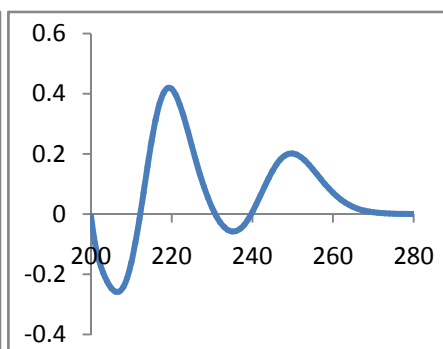

(h)

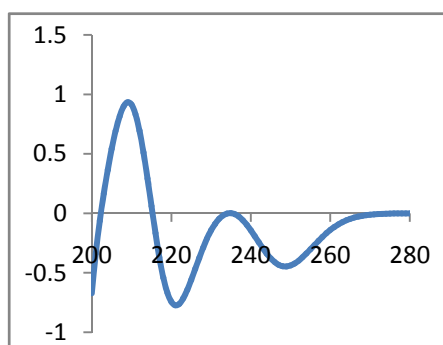

(i)

**Figure S2.** Calculated ECDs of each conformations of *7R,8R-2* (calculated at the LC-wPBE/6-311++G(2d,p)//B3LYP/6-311++G(2d,p) level in MeOH with IEFPCM solvation model).

**Table S3.** Important thermodynamic parameters (a.u.) and Boltzmann distributions of the optimized compound *7R,8R-2* calculated at CAM-B3LYP/6-311++G(2d,p)//B3LYP/6-311++G(2d,p) level in MeOH with IEFPCM solvation model.

| Conformations | E+ZPE        | G            | %     |
|---------------|--------------|--------------|-------|
| <b>a</b>      | -1149.973171 | -1150.513587 | 1.6   |
| <b>b</b>      | -1149.971854 | -1150.512212 | 0.33  |
| <b>c</b>      | -1149.973336 | -1150.513539 | 1.46  |
| <b>d</b>      | -1149.971887 | -1150.512444 | 0.31  |
| <b>e</b>      | -1149.975695 | -1150.516256 | 14.42 |
| <b>f</b>      | -1149.973400 | -1150.513755 | 1.68  |
| <b>g</b>      | -1149.976998 | -1150.517638 | 66.49 |
| <b>h</b>      | -1149.972007 | -1150.512478 | 0.41  |
| <b>i</b>      | -1149.975586 | -1150.516285 | 13.29 |

$E$  is the total electronic energy in MeOH at CAM-B3LYP/6-311++G(2d,p)//B3LYP/6-311++G(2d,p) level with IEFPCM solvation model,  $ZPE$  is the zero point energy in MeOH at B3LYP/6-311++G(2d,p) level with IEFPCM solvation model, and  $G$  is the Gibbs free energy by the sum of  $E$  and the thermal correction obtained at B3LYP/6-311++G(2d,p) level. %: Boltzmann distributions, using the relative Gibbs free energies as weighting factors.

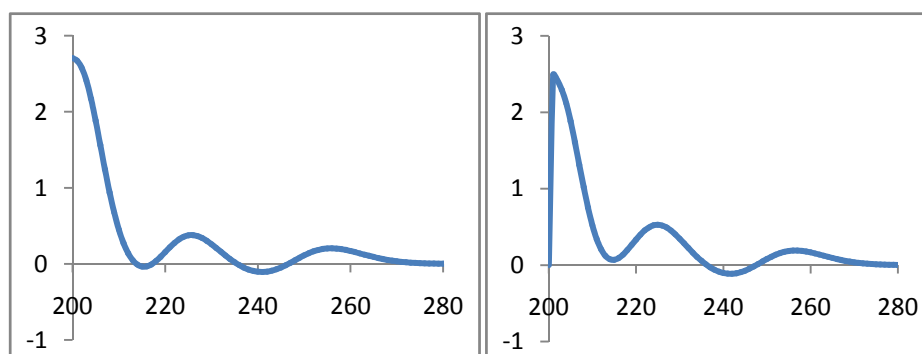

(a)

(b)

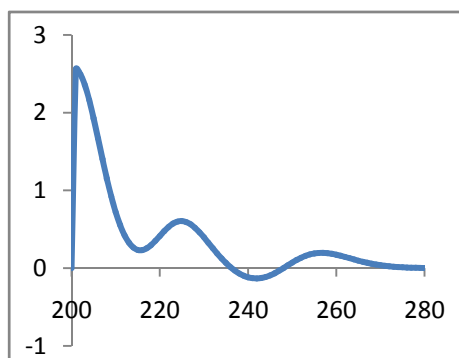

(c)

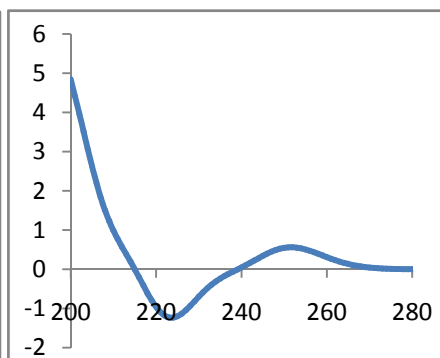

(d)

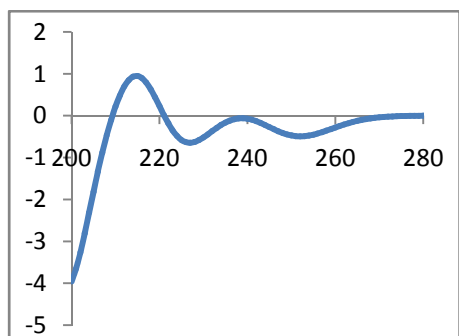

(e)

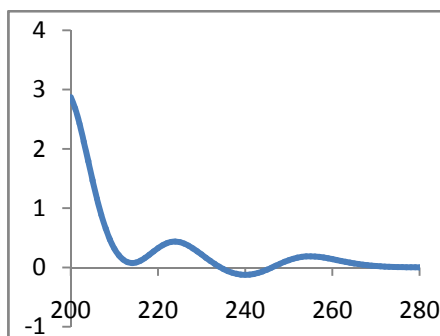

(f)

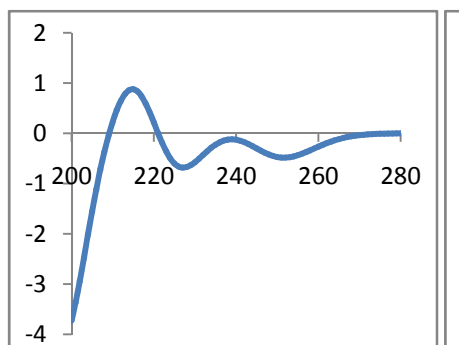

(g)

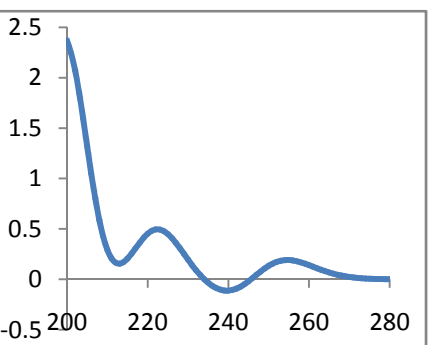

(h)

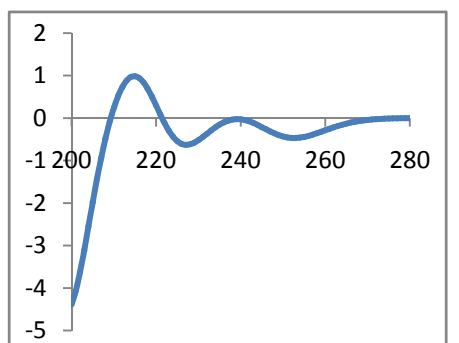

(i)

**Figure S3.** Calculated ECDs of each conformations of *7R,8R-2* (calculated at the

CAM-B3LYP/6-311++G(2d,p)//B3LYP/6-311++G(2d,p) level in MeOH with IEFPCM solvation model.

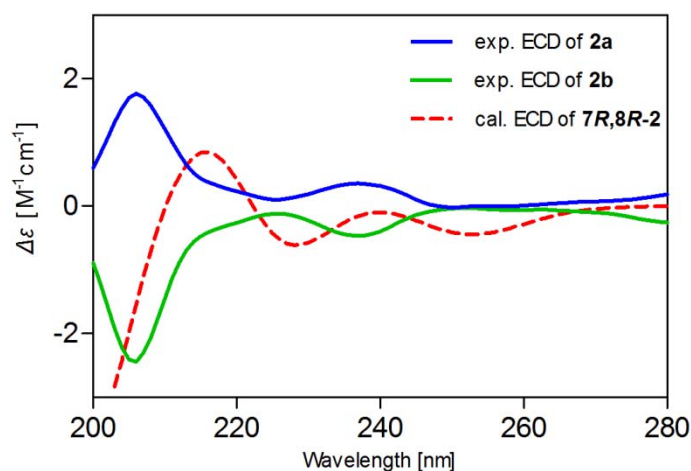

**Figure S4.** Calculated and experimental ECDs of **2** and **7R,8R-2** at the CAM-B3LYP/6-311++G(2d,p)//B3LYP/6-311++G(2d,p) level in MeOH with IEFPCM solvation model.

**Table S4.** Important thermodynamic parameters (a.u.) and Boltzmann distributions of the optimized compound **7R,8R-2** calculated at WB97XD/6-311++G(2d,p)//B3LYP/6-311++G(2d,p) level in MeOH with IEFPCM solvation model.

| Conformations | E+ZPE        | G            | %     |
|---------------|--------------|--------------|-------|
| <b>a</b>      | -1150.142381 | -1150.513587 | 5.79  |
| <b>b</b>      | -1150.140407 | -1150.512212 | 0.72  |
| <b>c</b>      | -1150.141879 | -1150.513539 | 3.40  |
| <b>d</b>      | -1150.140170 | -1150.512444 | 0.56  |
| <b>e</b>      | -1150.142802 | -1150.516256 | 9.04  |
| <b>f</b>      | -1150.142219 | -1150.513755 | 4.87  |
| <b>g</b>      | -1150.144647 | -1150.517638 | 63.72 |
| <b>h</b>      | -1150.140881 | -1150.512478 | 1.18  |
| <b>i</b>      | -1150.142965 | -1150.516285 | 10.73 |

*E* is the total electronic energy in MeOH at WB97XD/6-311++G(2d,p)//B3LYP/6-311++G(2d,p) level with IEFPCM solvation model, *ZPE* is the zero point energy in MeOH at B3LYP/6-311++G(2d,p) level with IEFPCM solvation model, and *G* is the Gibbs free energy by the sum of *E* and the thermal correction obtained at B3LYP/6-311++G(2d,p) level. %: Boltzmann

distributions, using the relative Gibbs free energies as weighting factors.

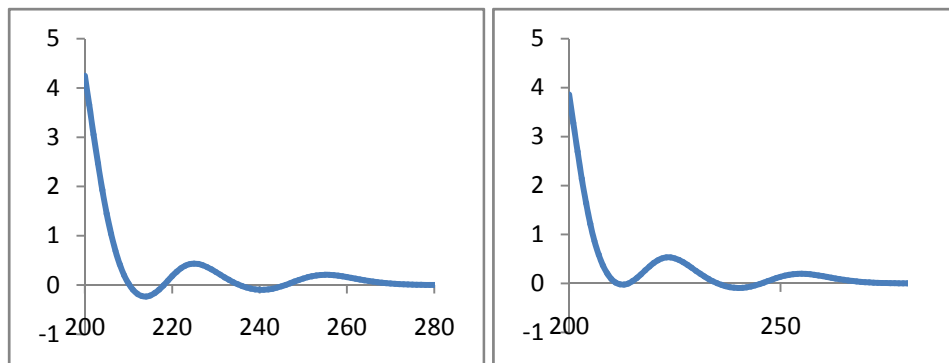

(a)(b)

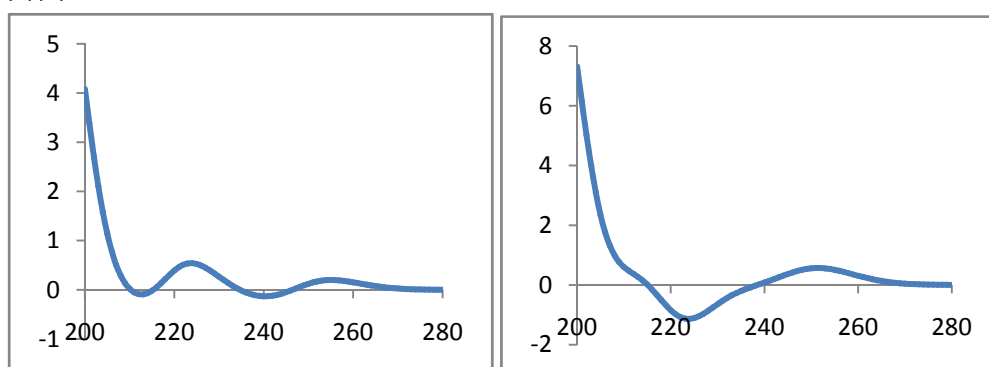

(c)

(d)

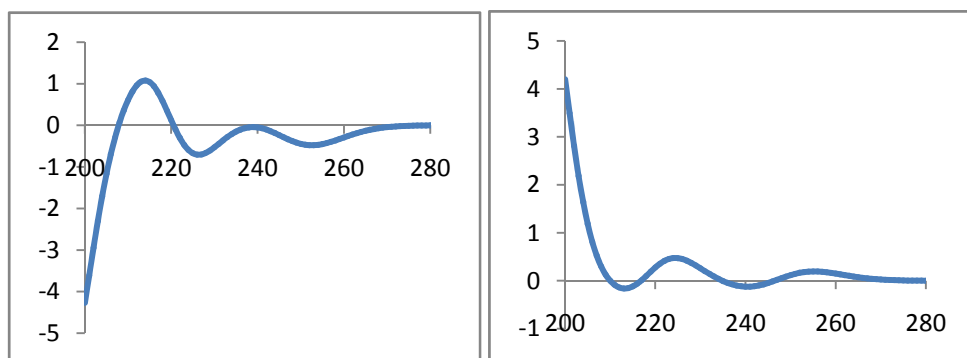

(e)

(f)

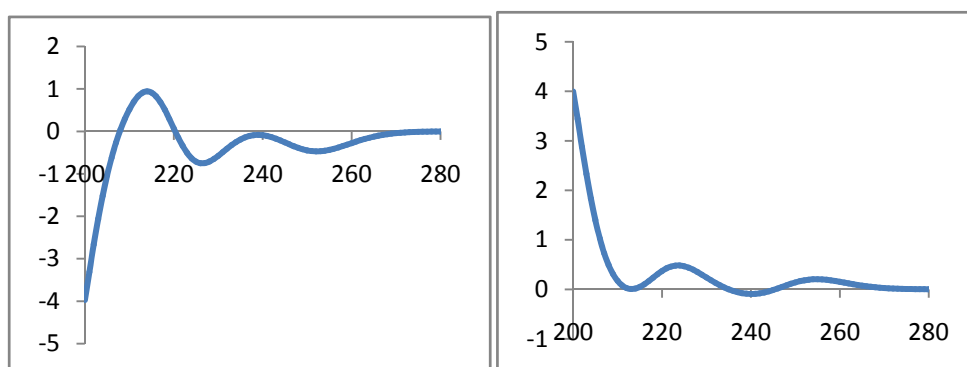

(g)

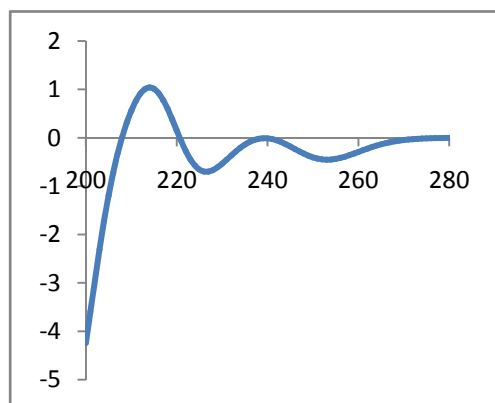

(h)

(i)

**Figure S5.** Calculated ECDs of each conformations of *7R,8R-2* (calculated at the WB97XD/6-311++G(2d,p)//B3LYP/6-311++G(2d,p) level in MeOH with IEFPCM solvation model).

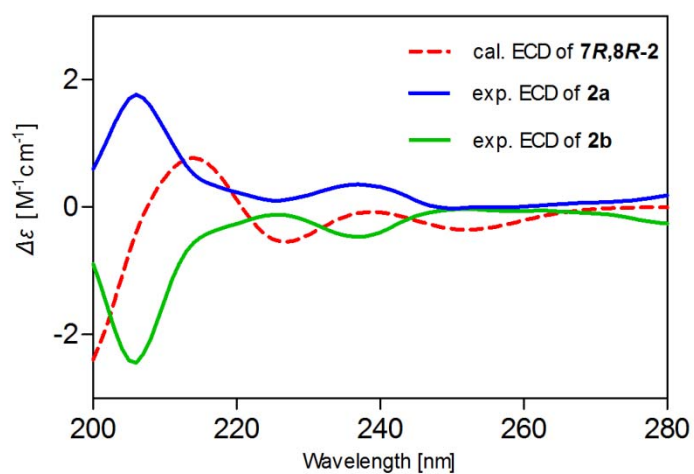

**FigureS6.** Calculated and experimental ECDs of **2** and *7R,8R-2* at the WB97XD/6-311++G(2d,p)//B3LYP/6-311++G(2d,p) level in MeOH with IEFPCM solvation model.



## HRESIMS of compound 1

T: FTMS + p ESI Full ms [50.00-1500.00]

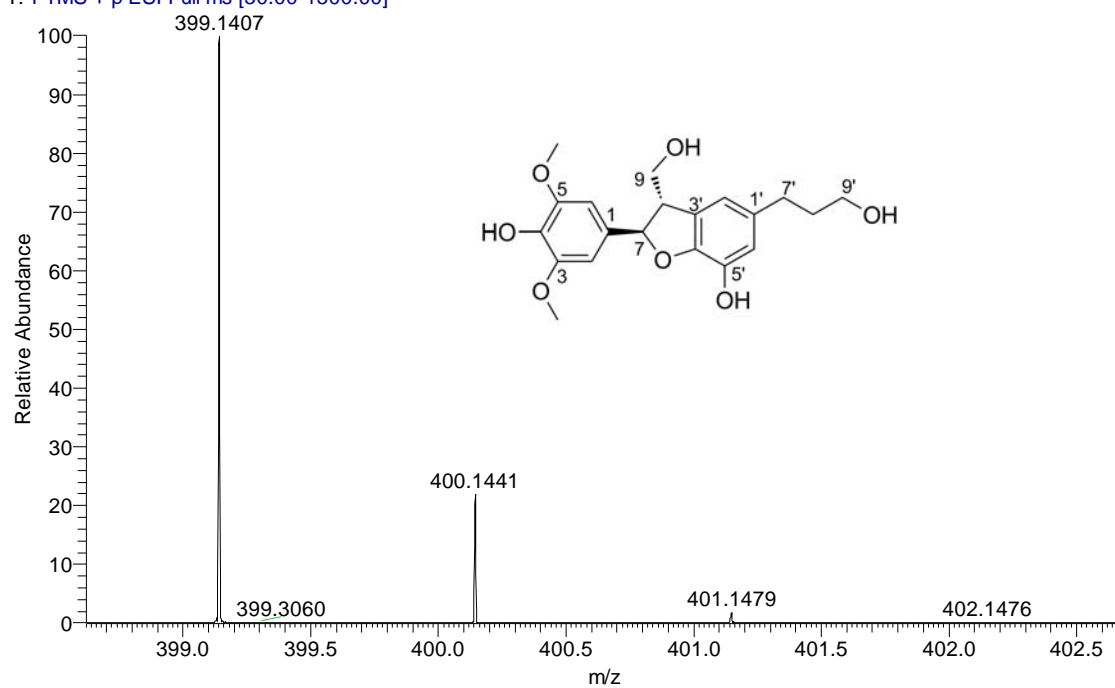

## UV spectrum of compound 1

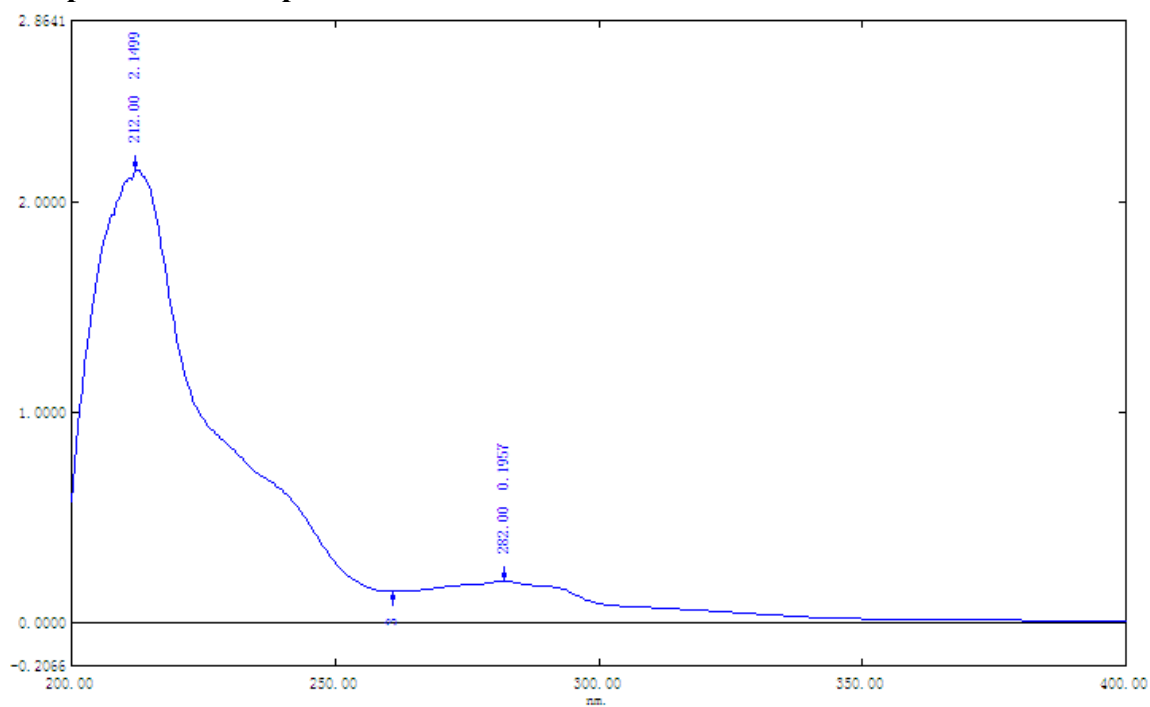

## IR spectrum of compound 1

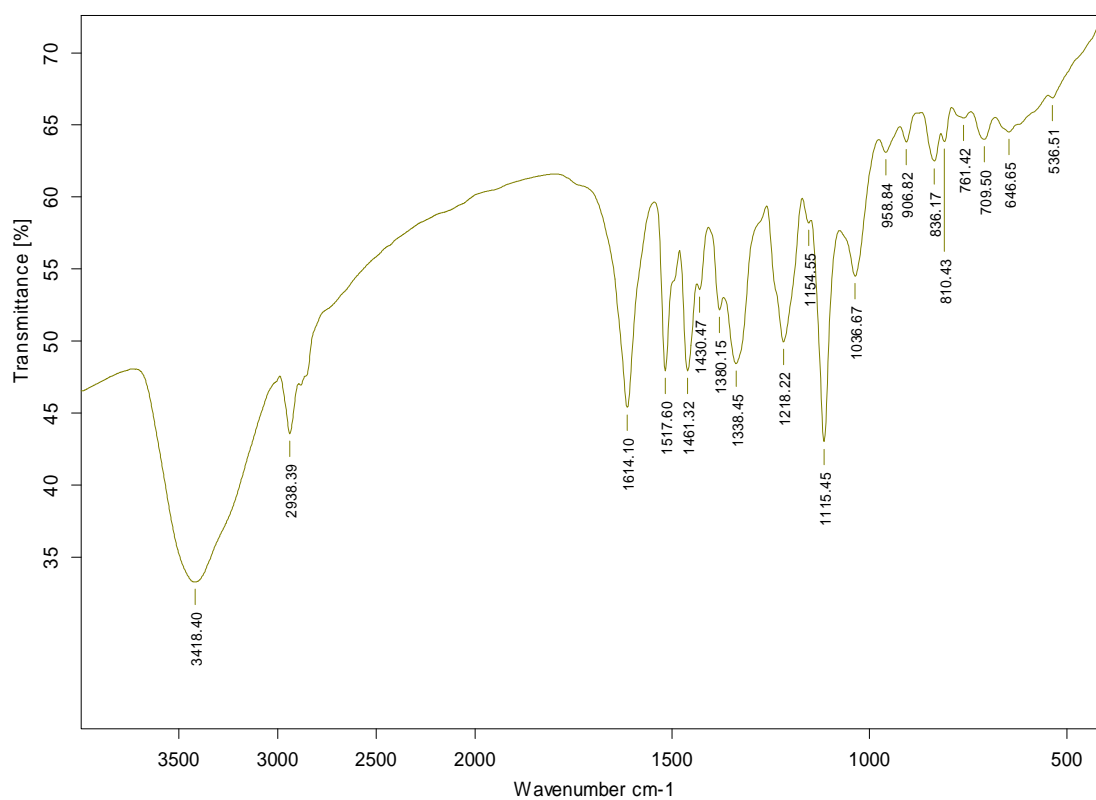

## <sup>1</sup>H NMR of compound 1

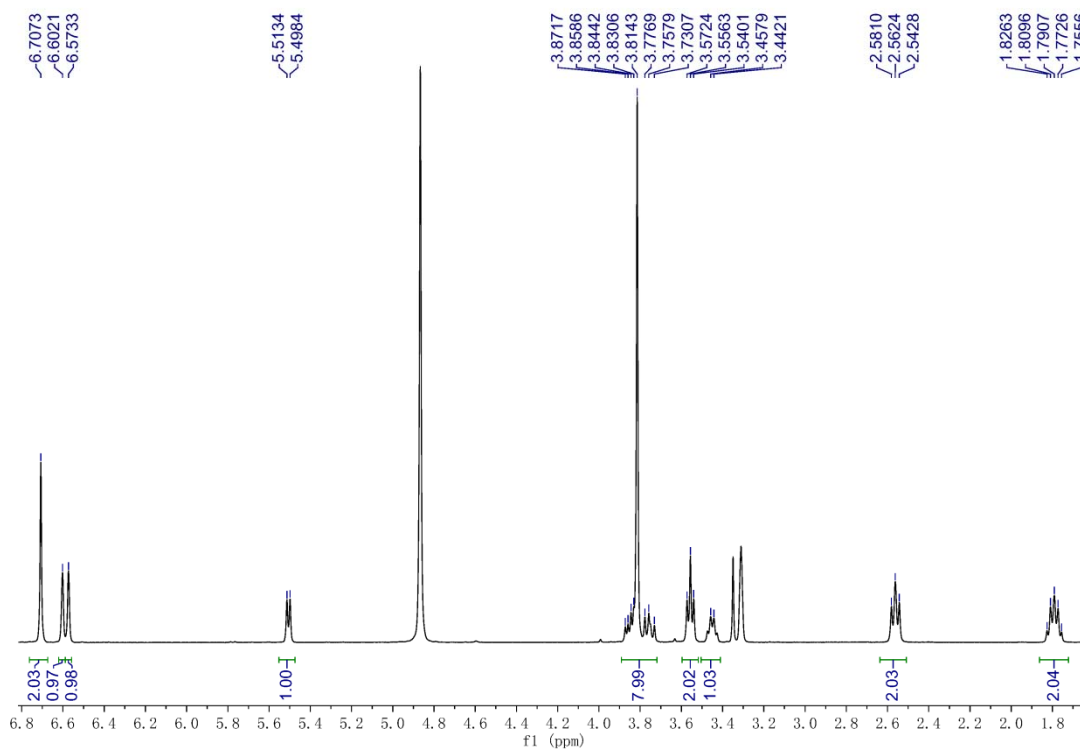

### <sup>13</sup>C NMR and DEPT of compound 1

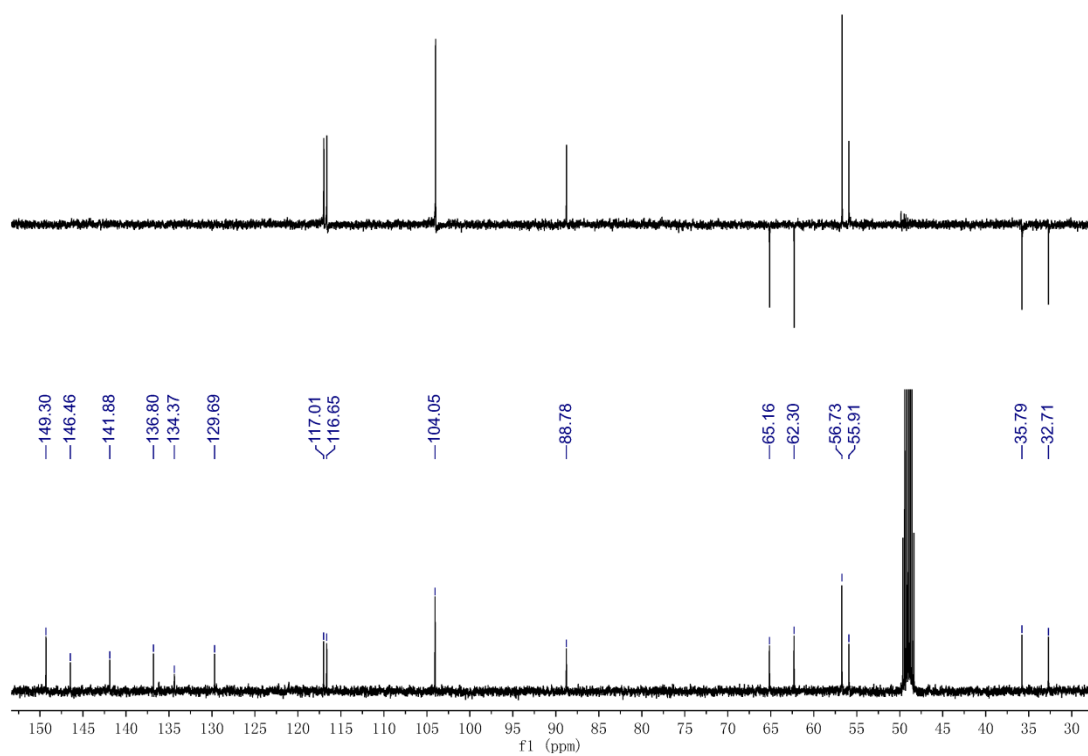

### HSQC of compound 1

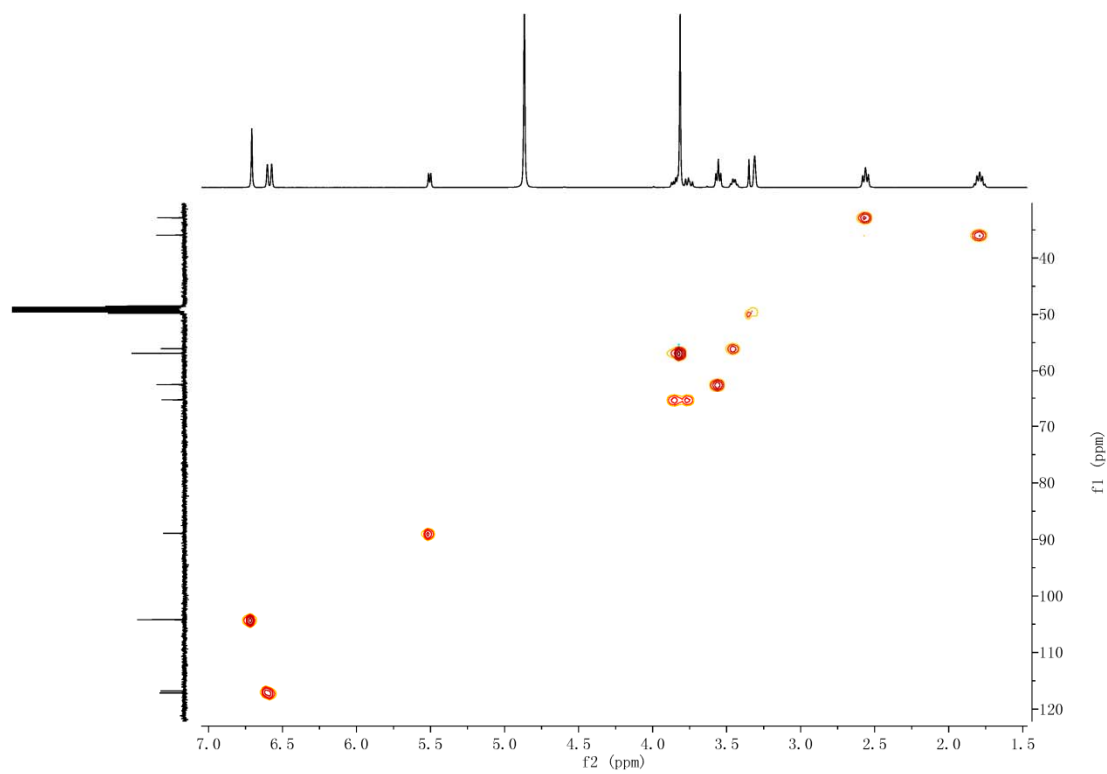

### HMBC of compound 1

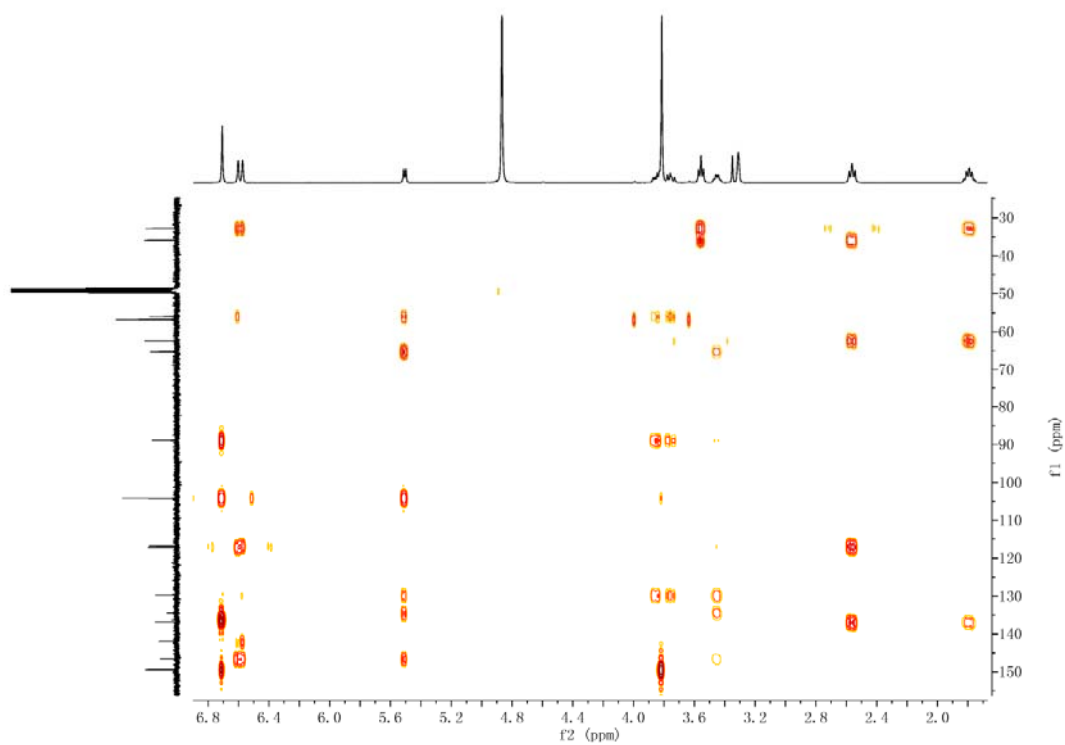

### $^1\text{H}$ - $^1\text{H}$ COSY of compound 1

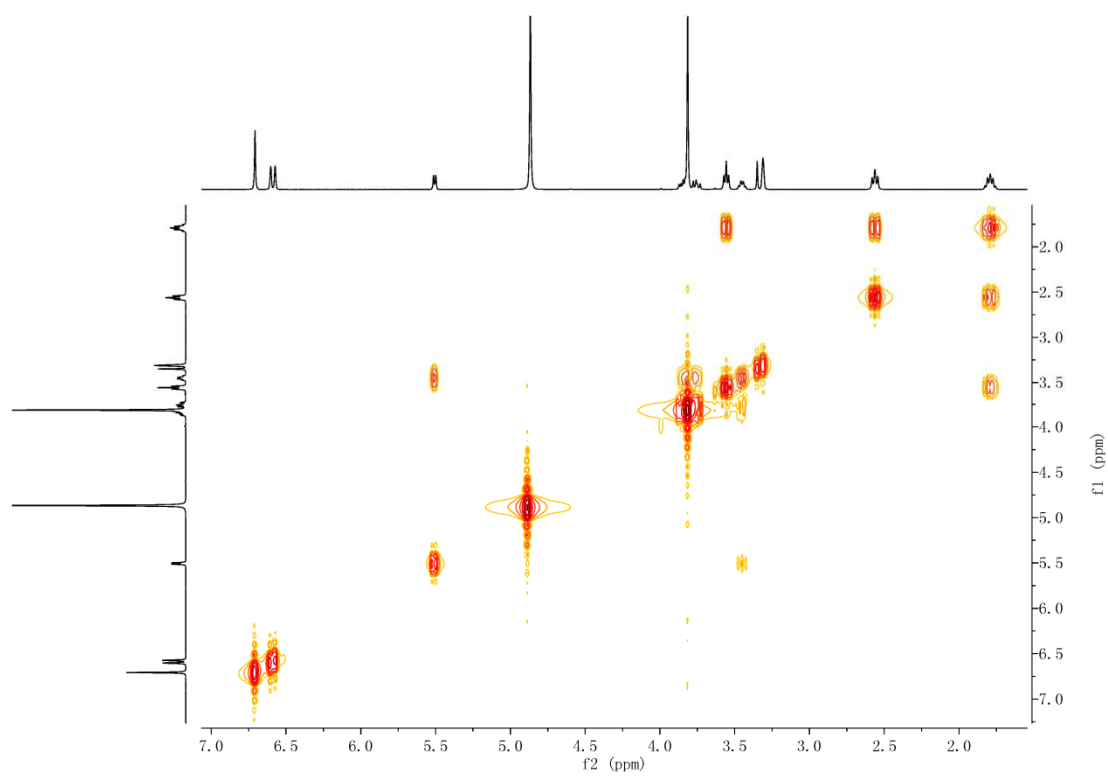

## NOESY of compound 1

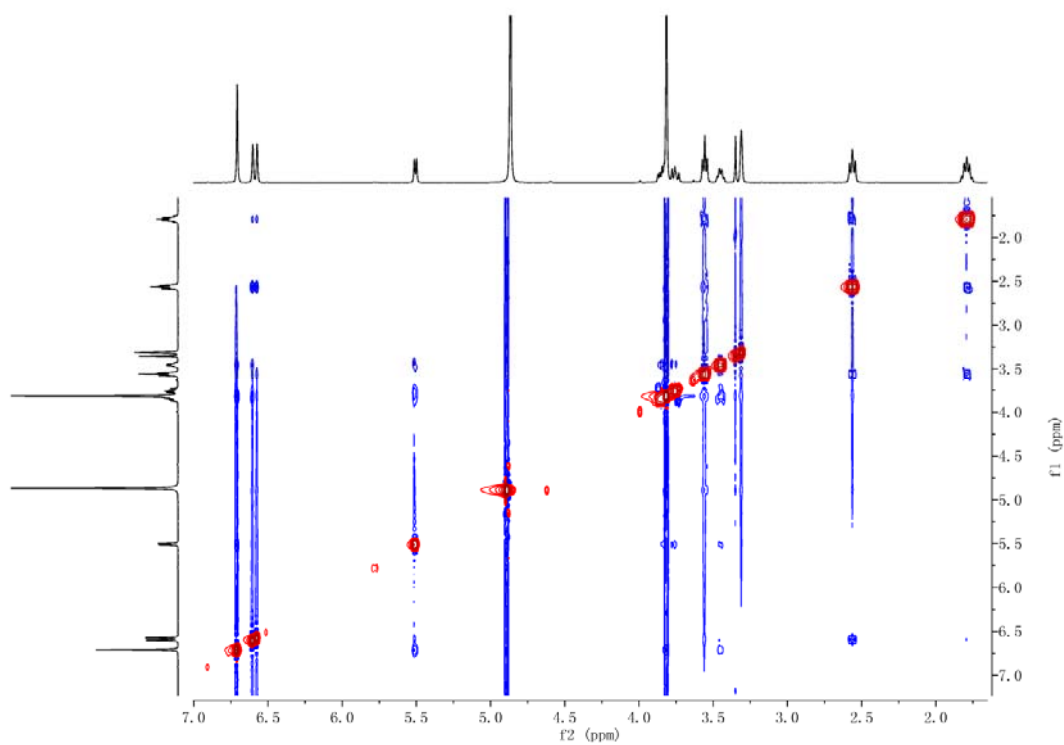

## HRESIMS of compound 2

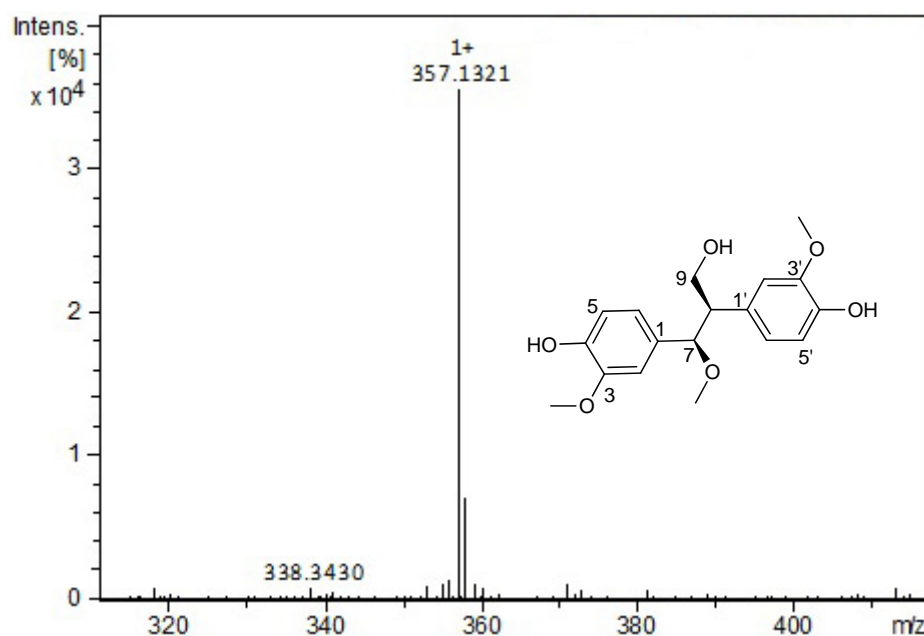

## UV spectrum of compound 2

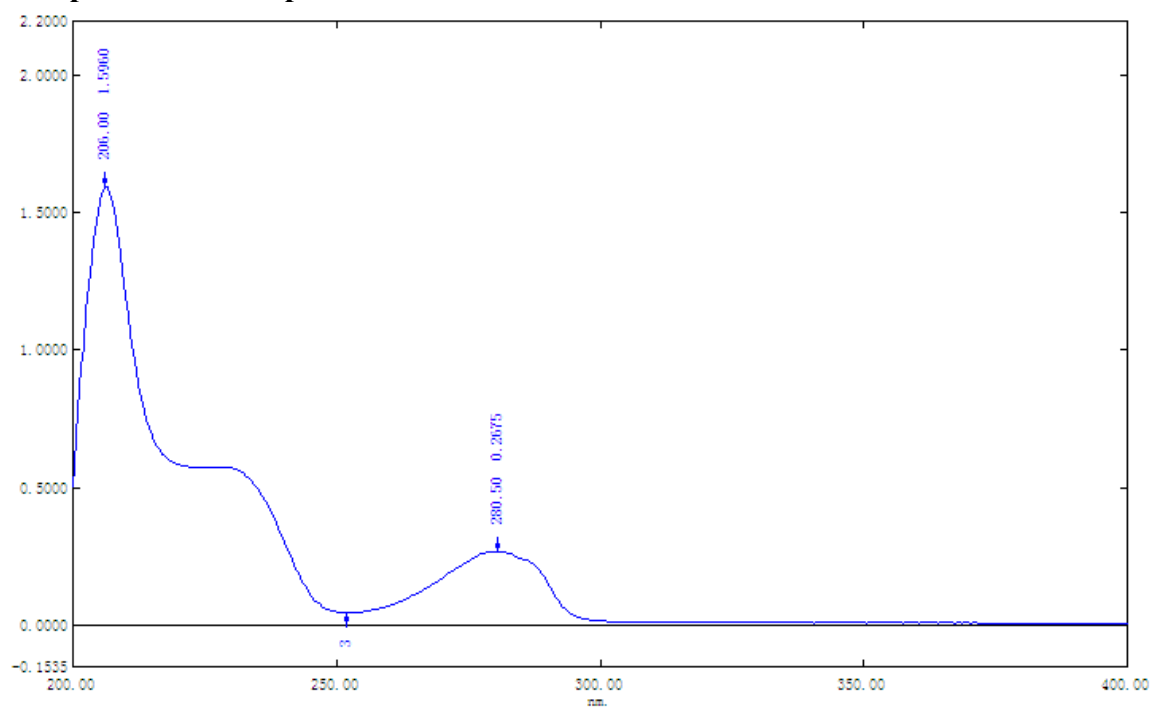

## IR spectrum of compound 2

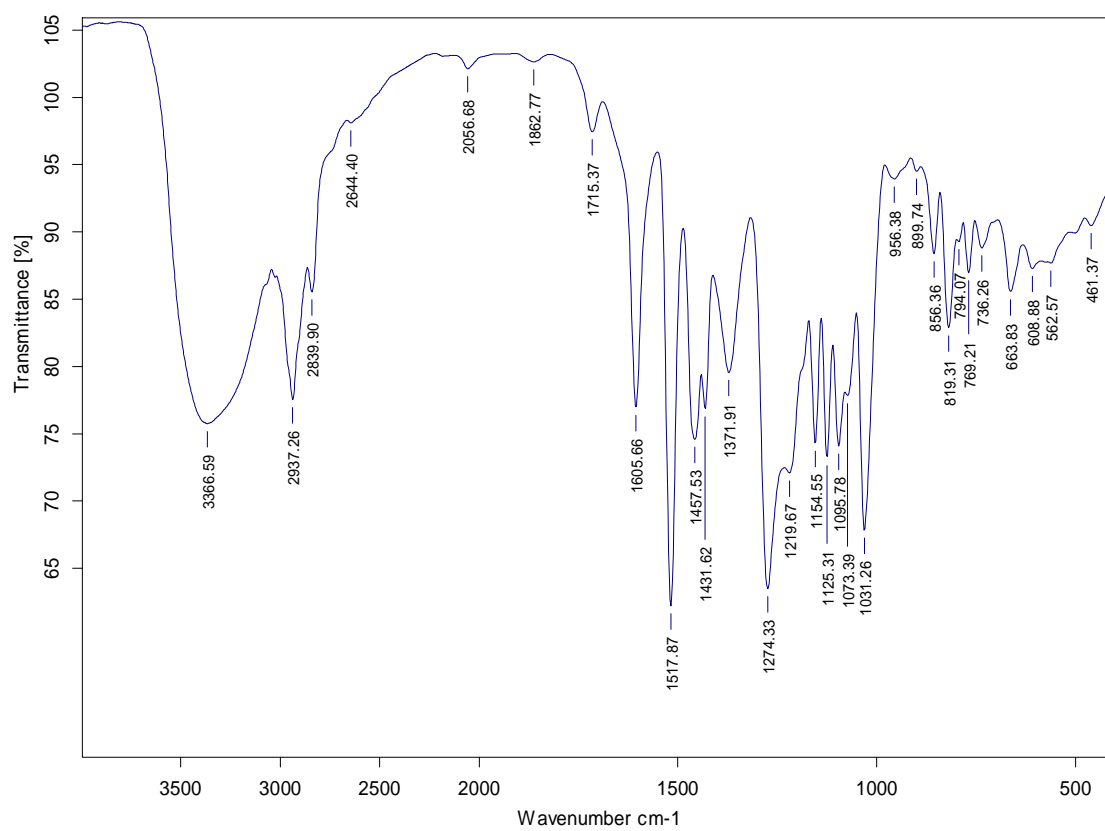

### <sup>1</sup>H NMR of compound 2

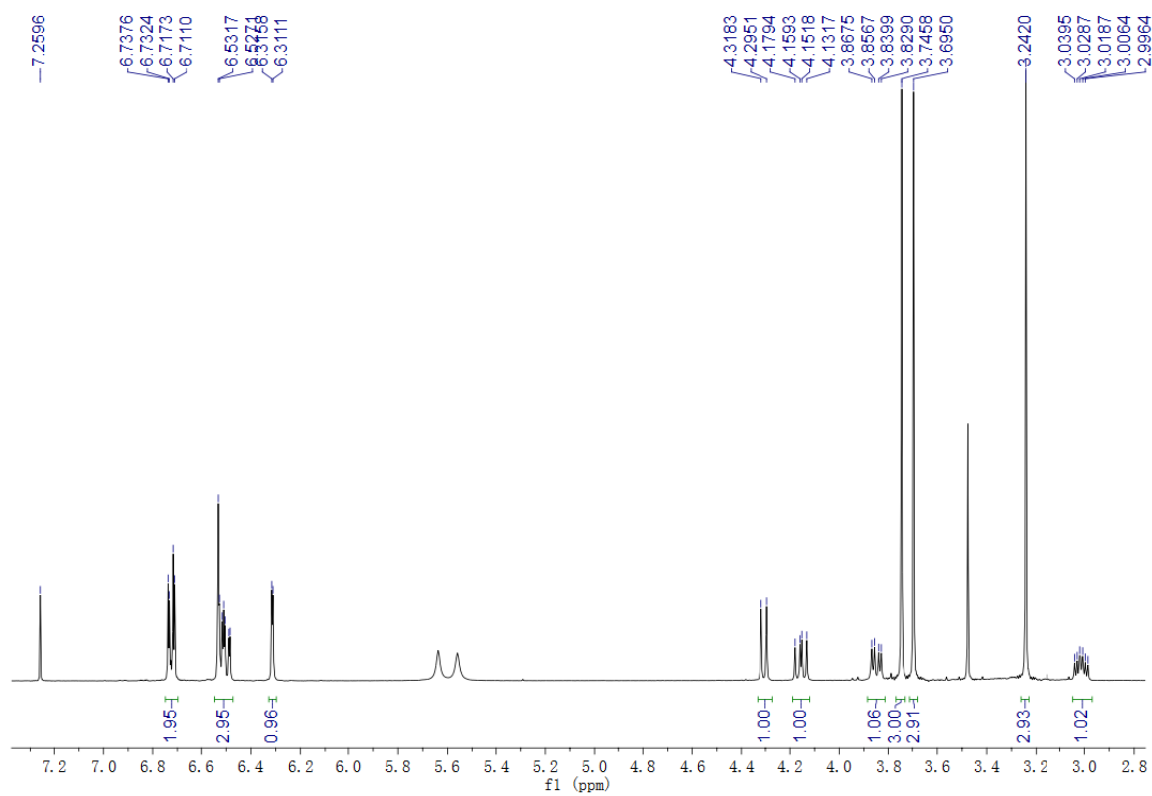

### <sup>13</sup>C NMR and DEPT of compound 2

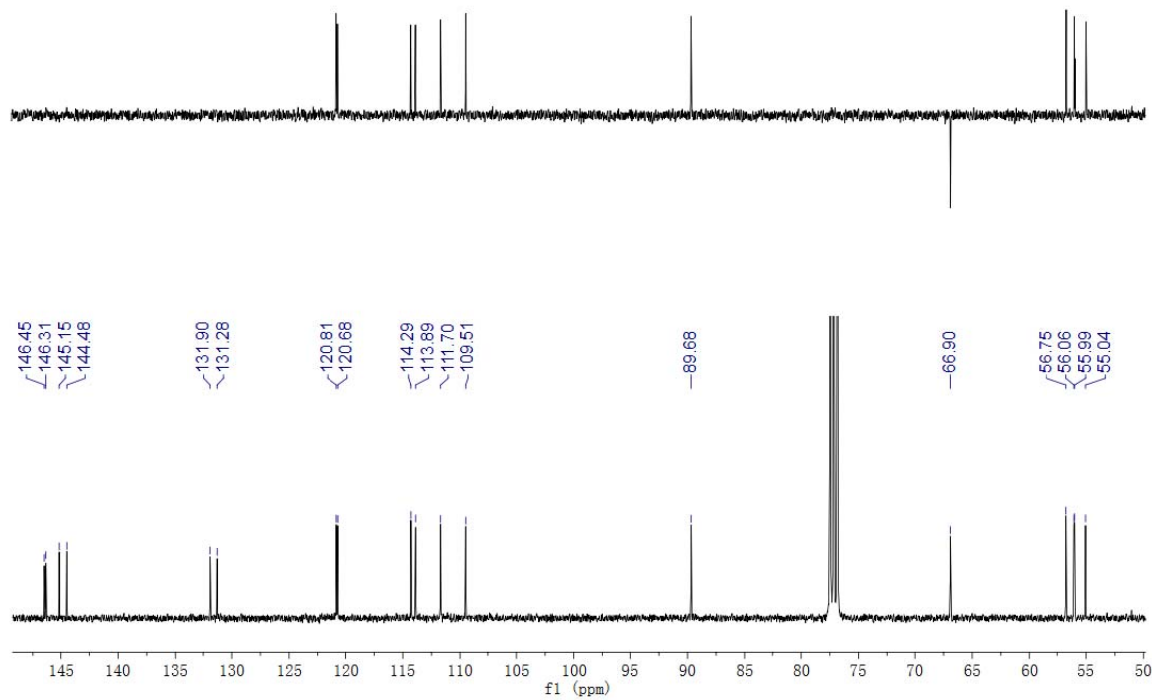

## HSQC of compound 2

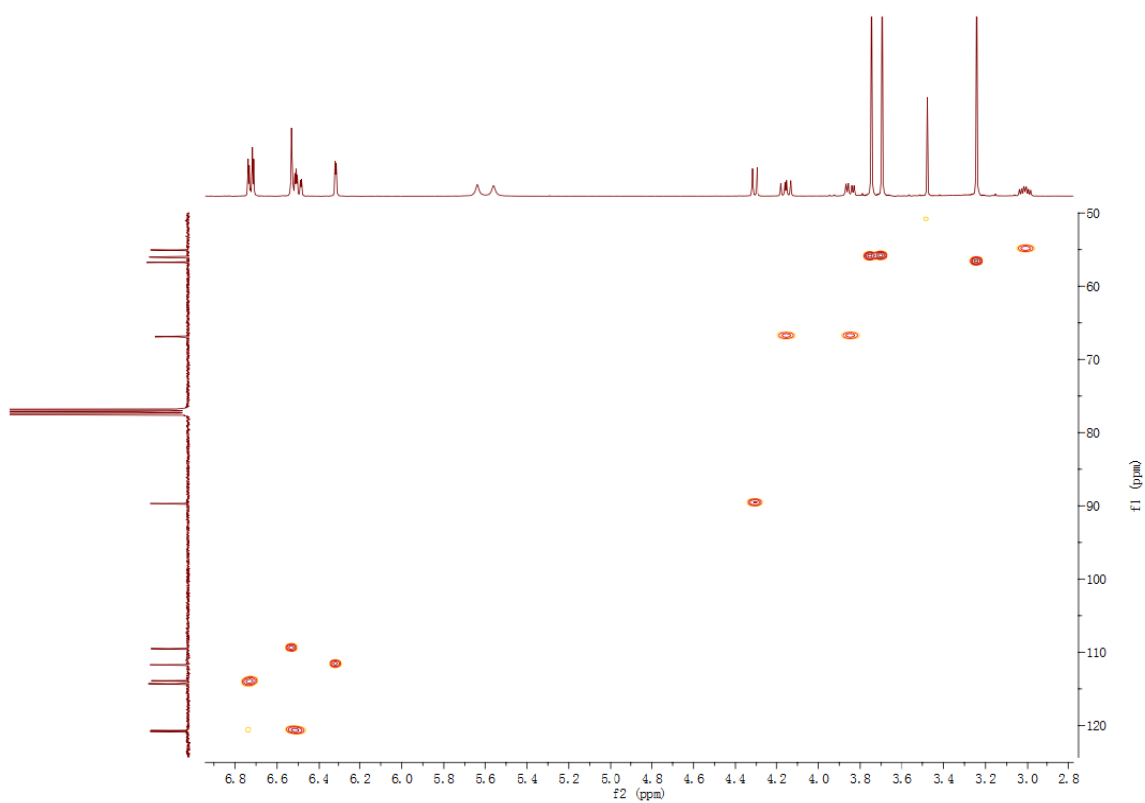

## HMBC of compound 2

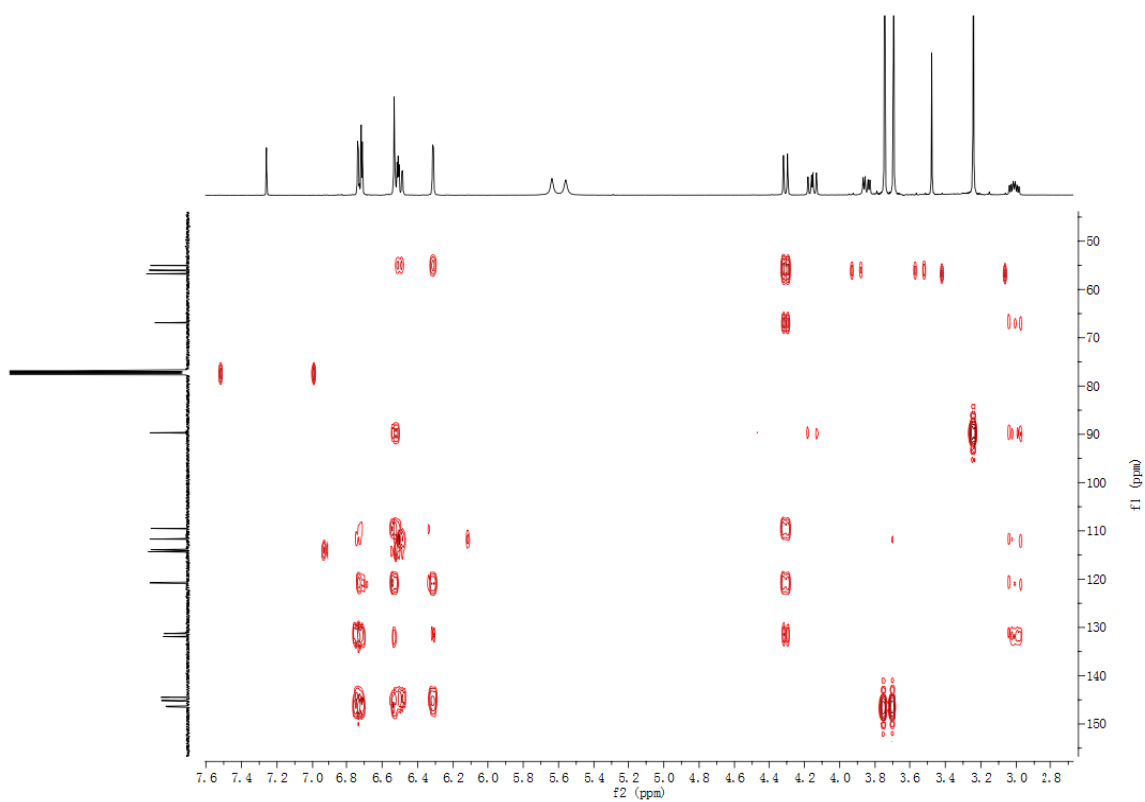



## $^1\text{H}$ - $^1\text{H}$ COSY of compound 2

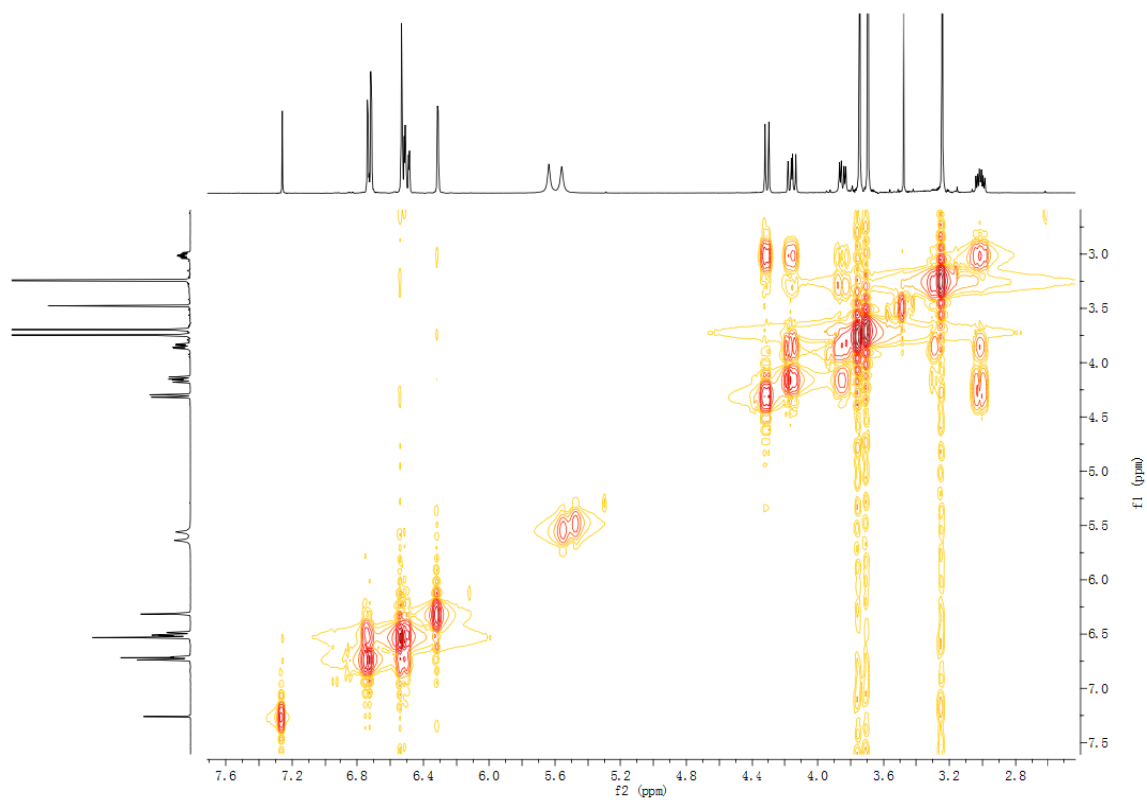

## NOESY of compound 2

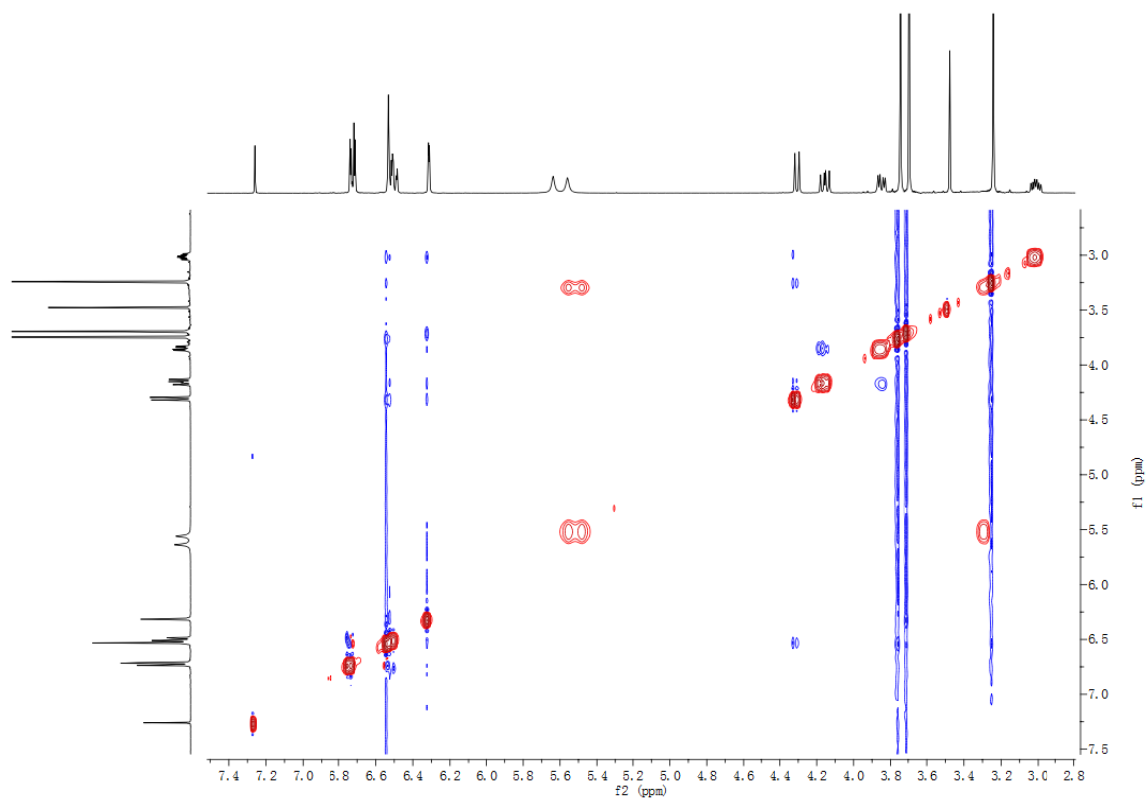

### HRESIMS of compound 3

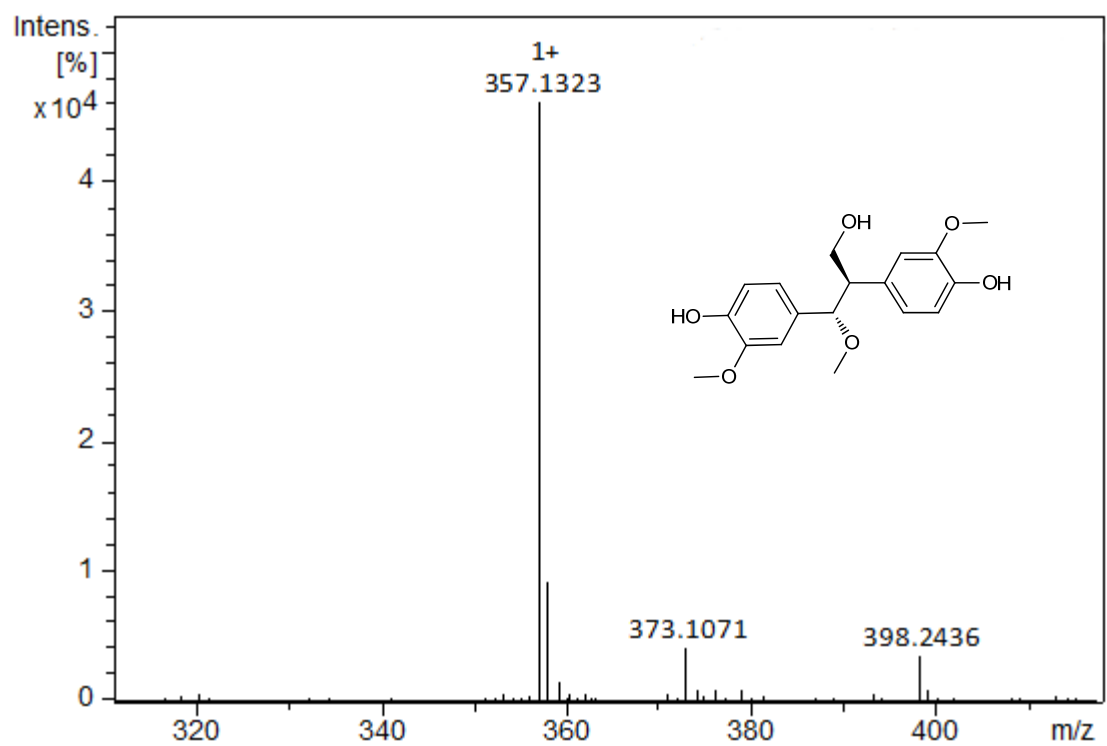

### UV spectrum of compound 3

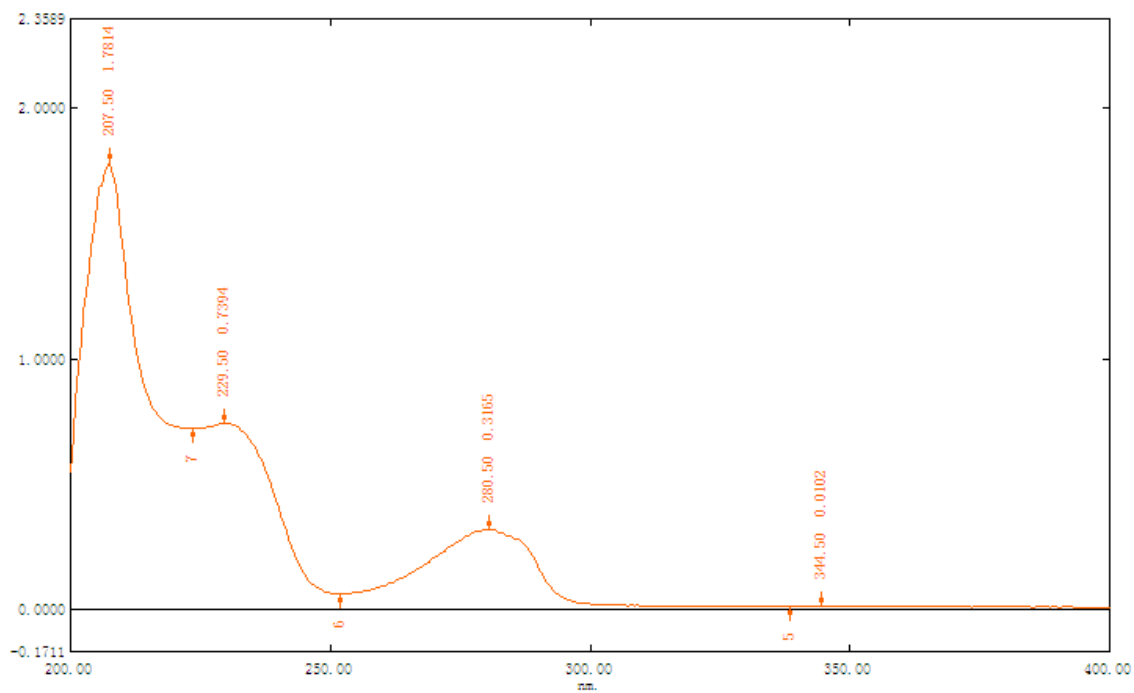

### IR spectrum of compound 3

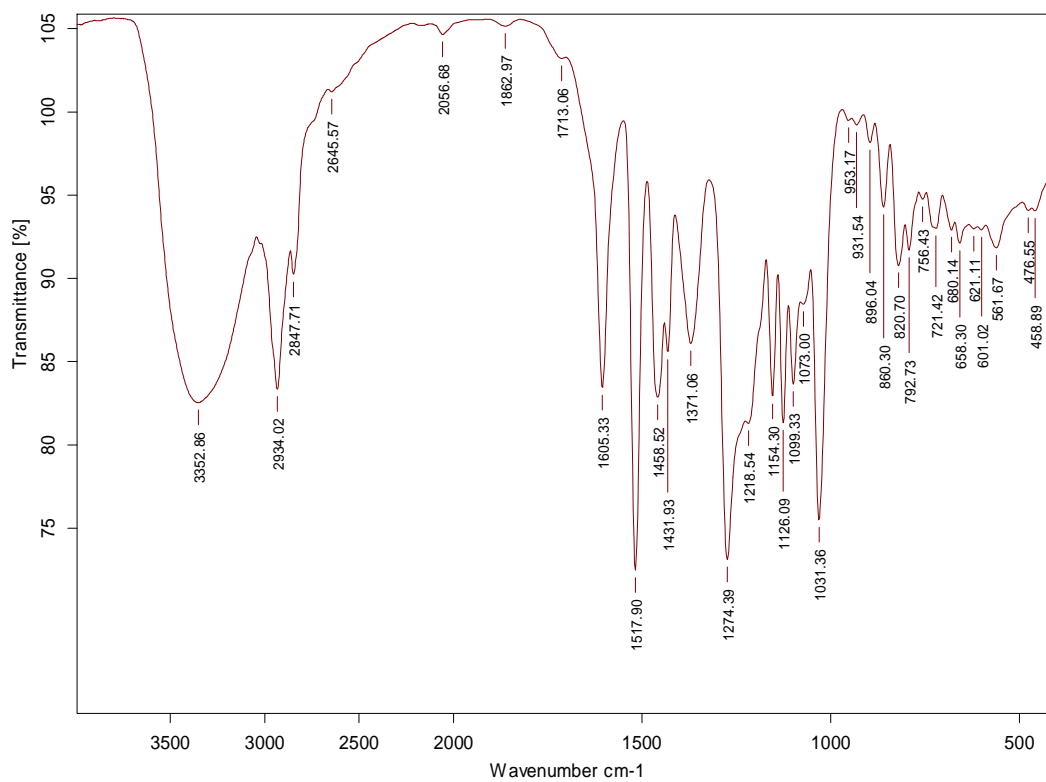

### <sup>1</sup>H NMR of compound 3

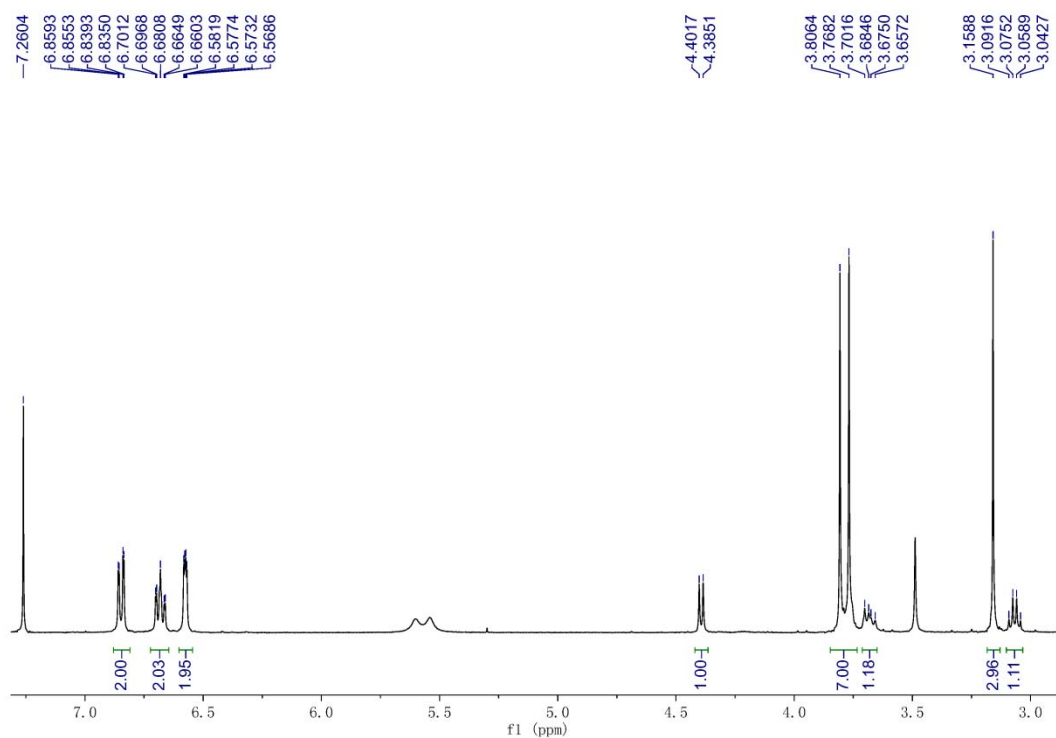

### <sup>13</sup>C NMR and DEPT of compound 3

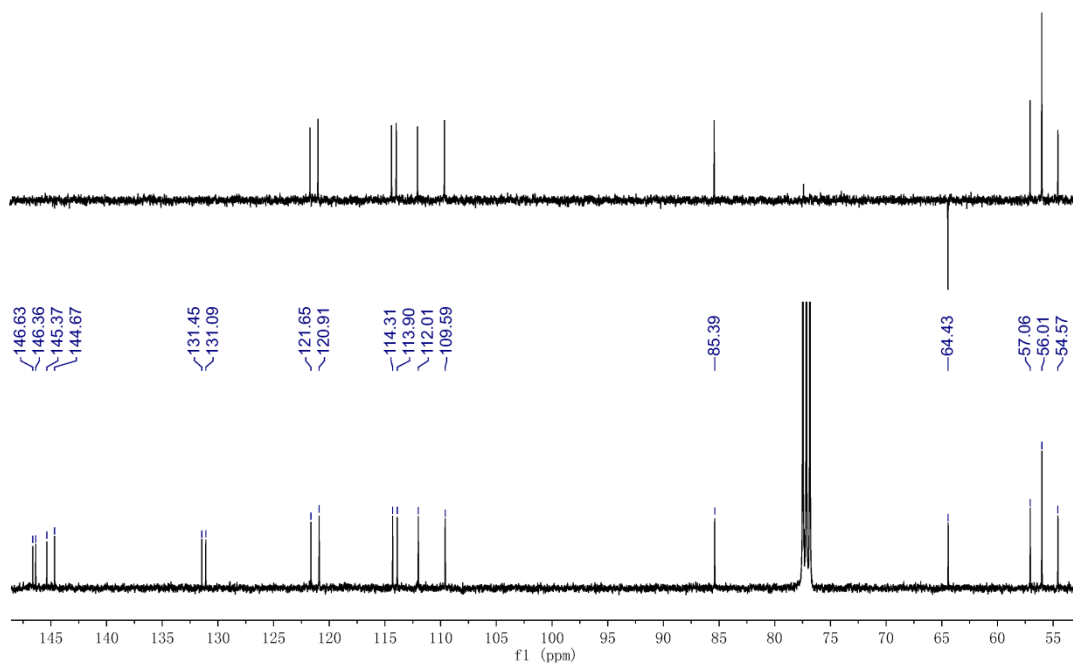

### HSQC of compound 3

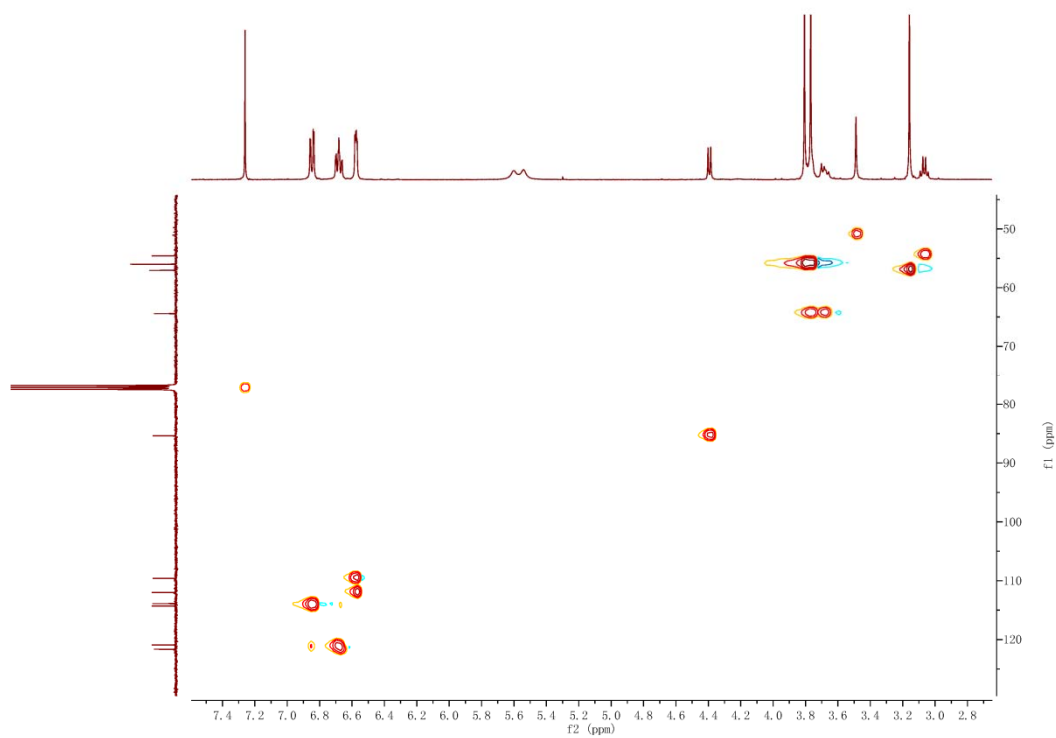

### HMBC of compound 3

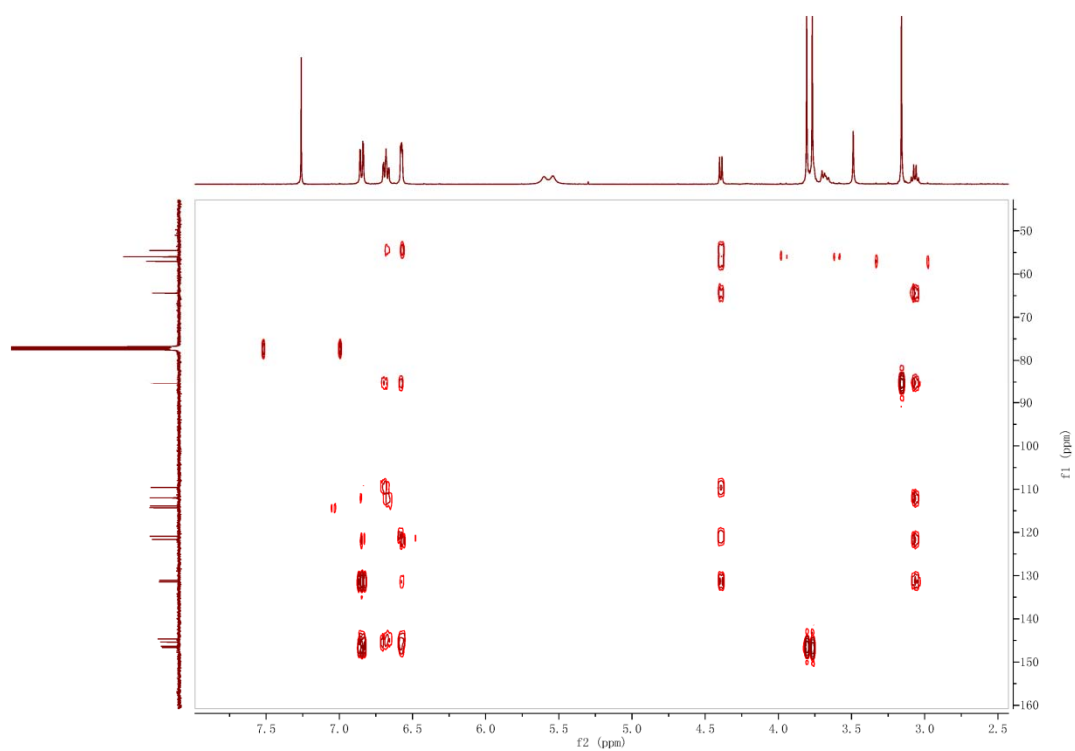

### $^1\text{H}$ - $^1\text{H}$ COSY of compound 3

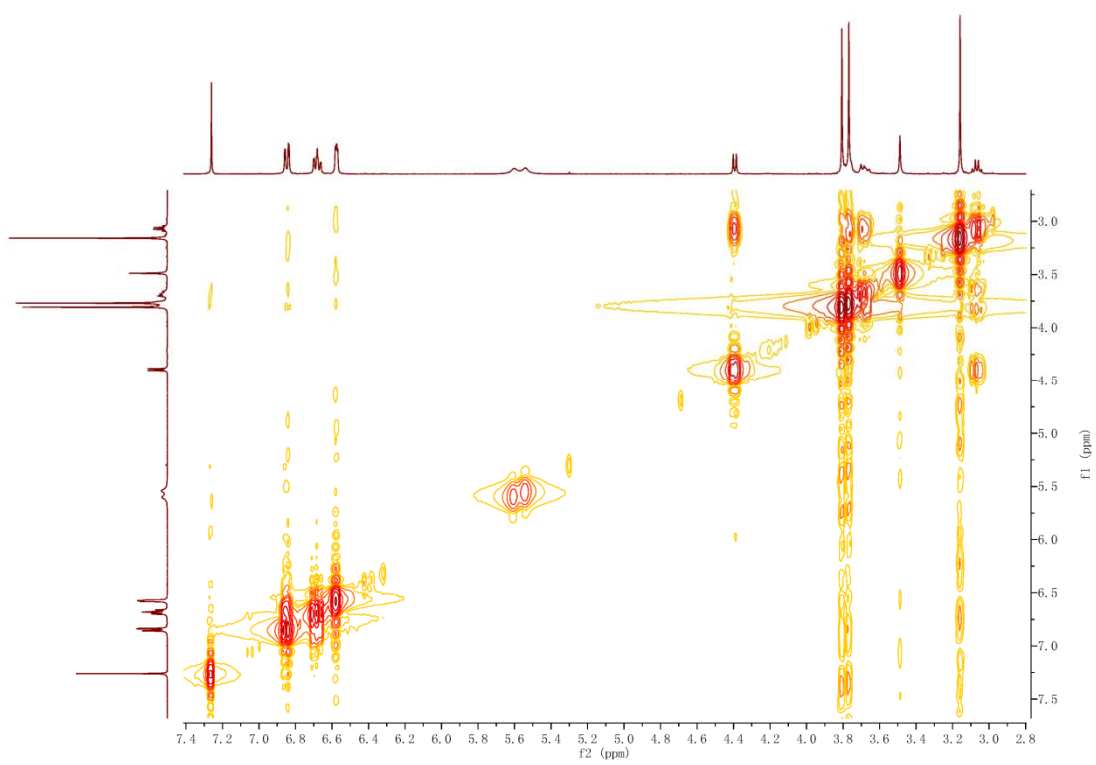

### NOESY of compound 3

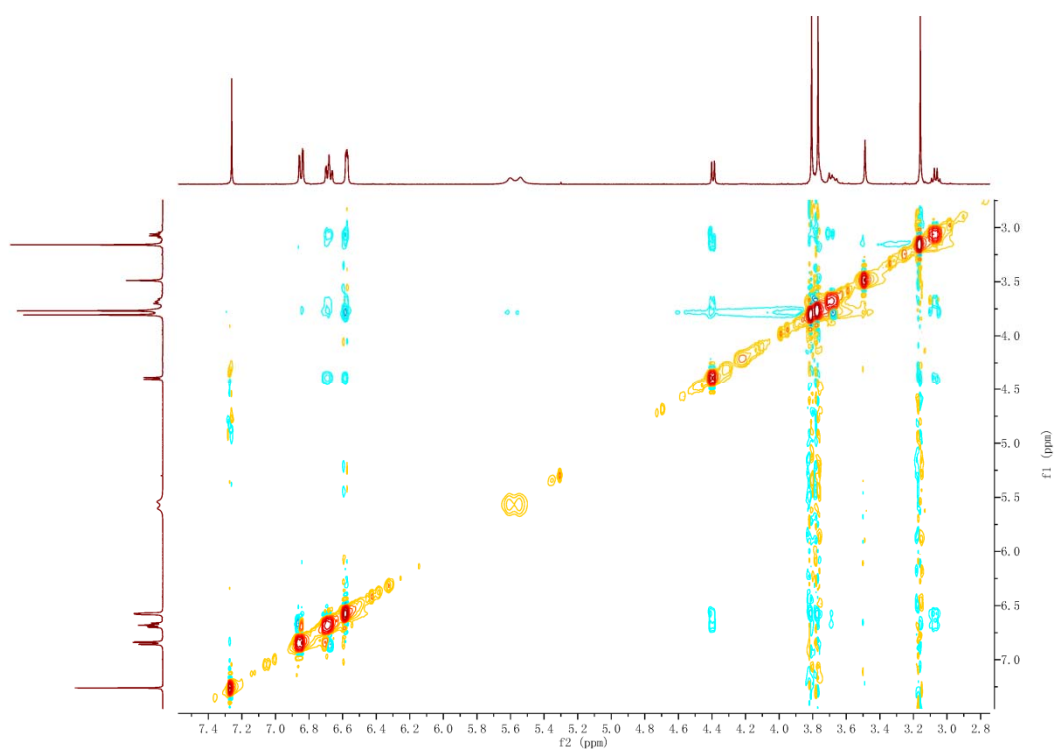

### HRESIMS of compound 4

T: FTMS + p ESI Full ms [50.00-1500.00]

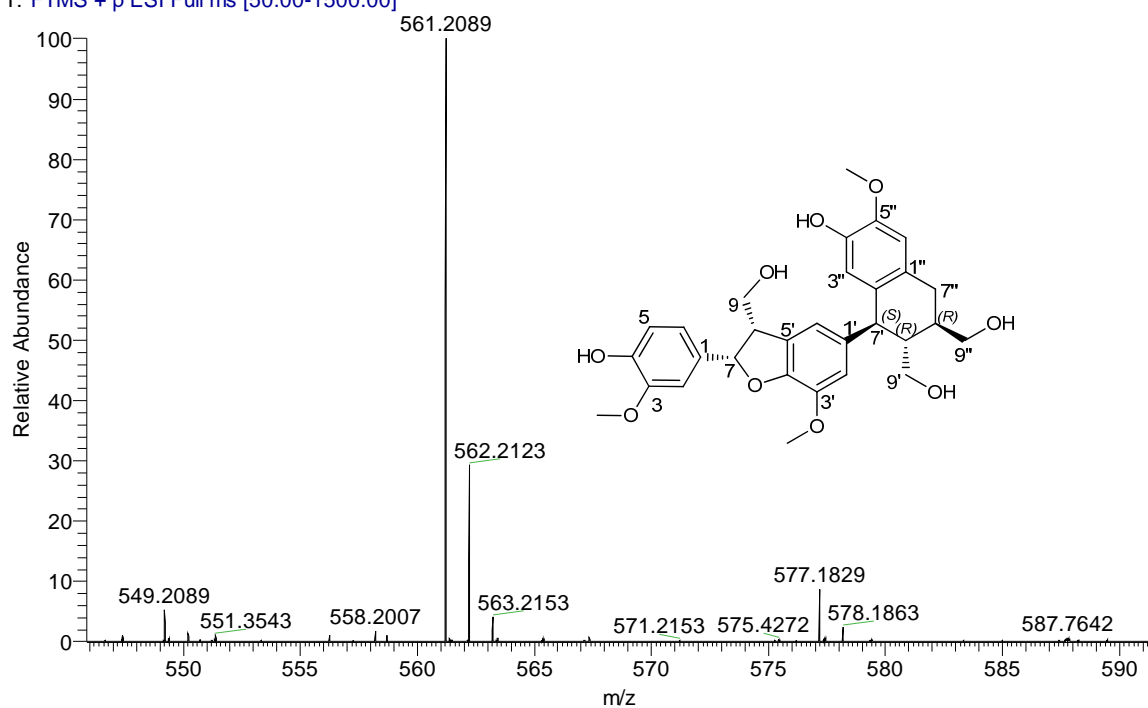

## UV spectrum of compound 4

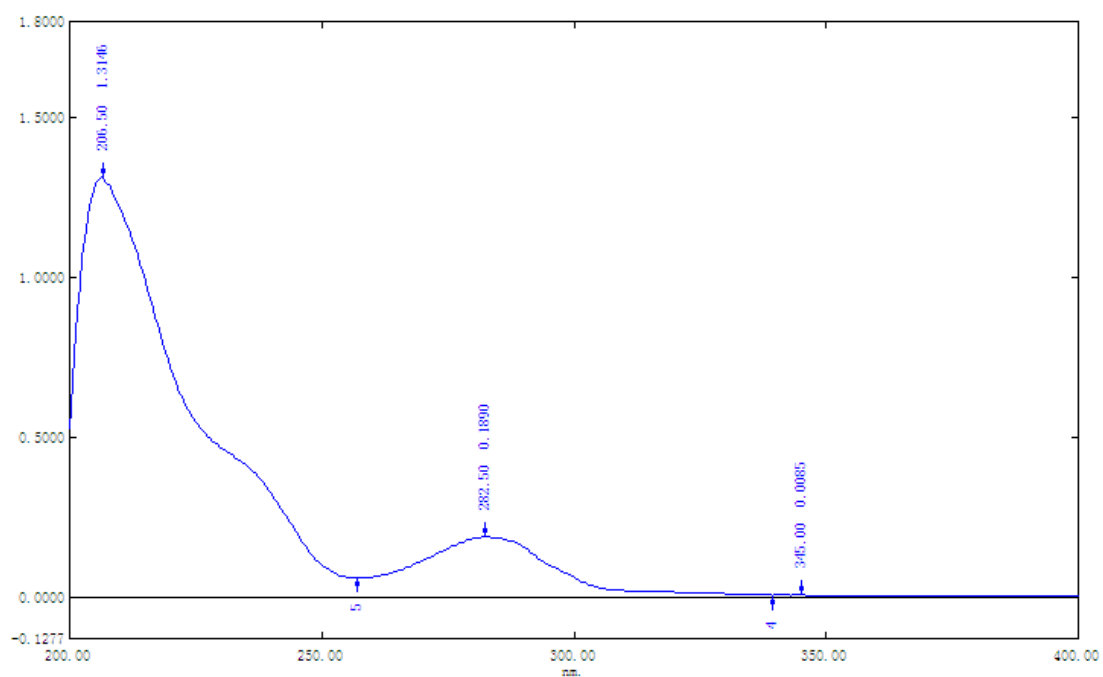

## IR spectrum of compound 4

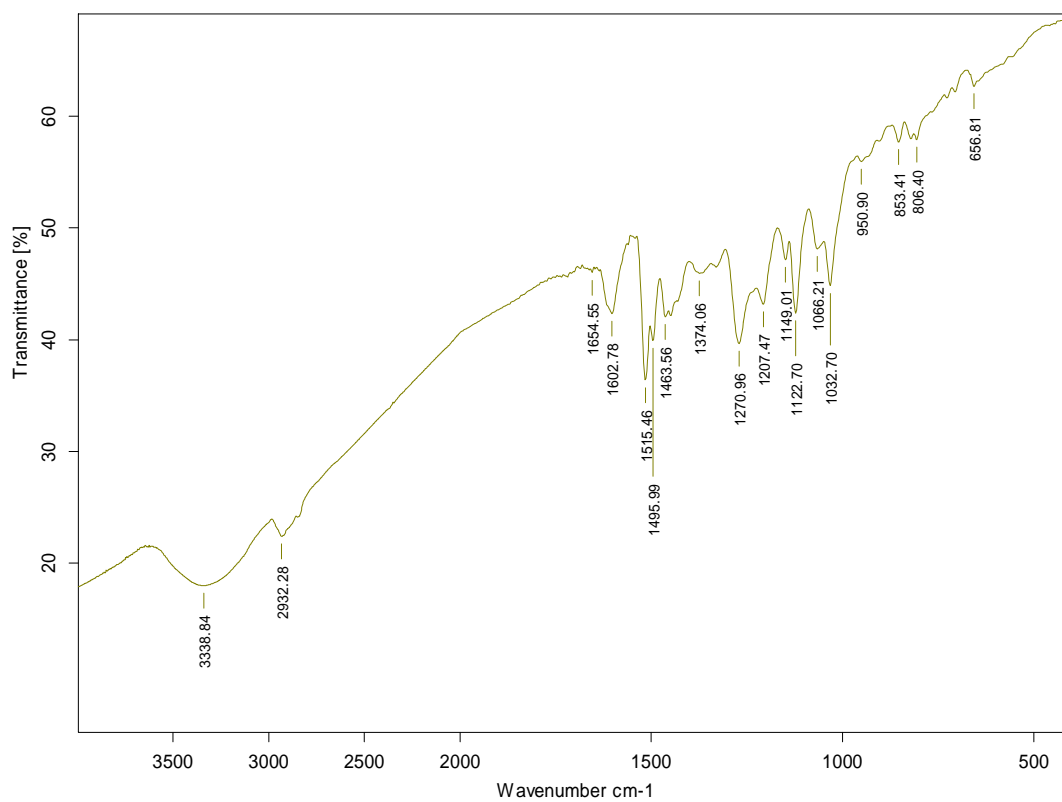

### <sup>1</sup>H NMR of compound 4

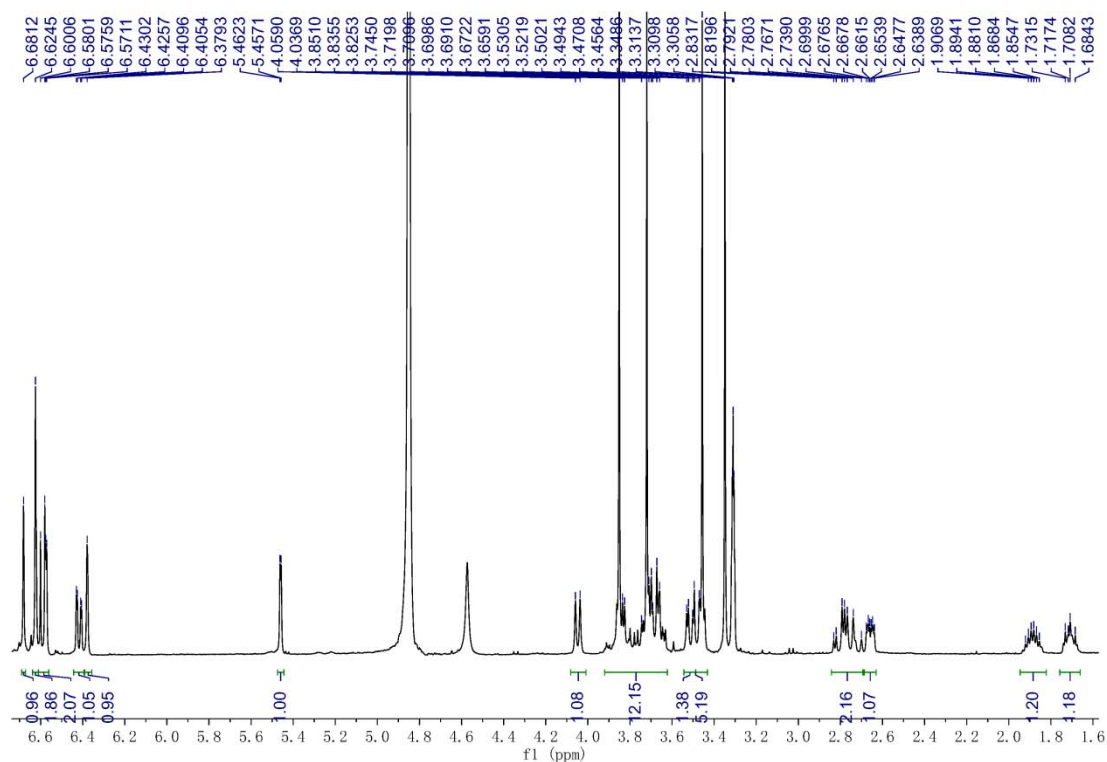

### <sup>13</sup>C NMR and DEPT of compound 4

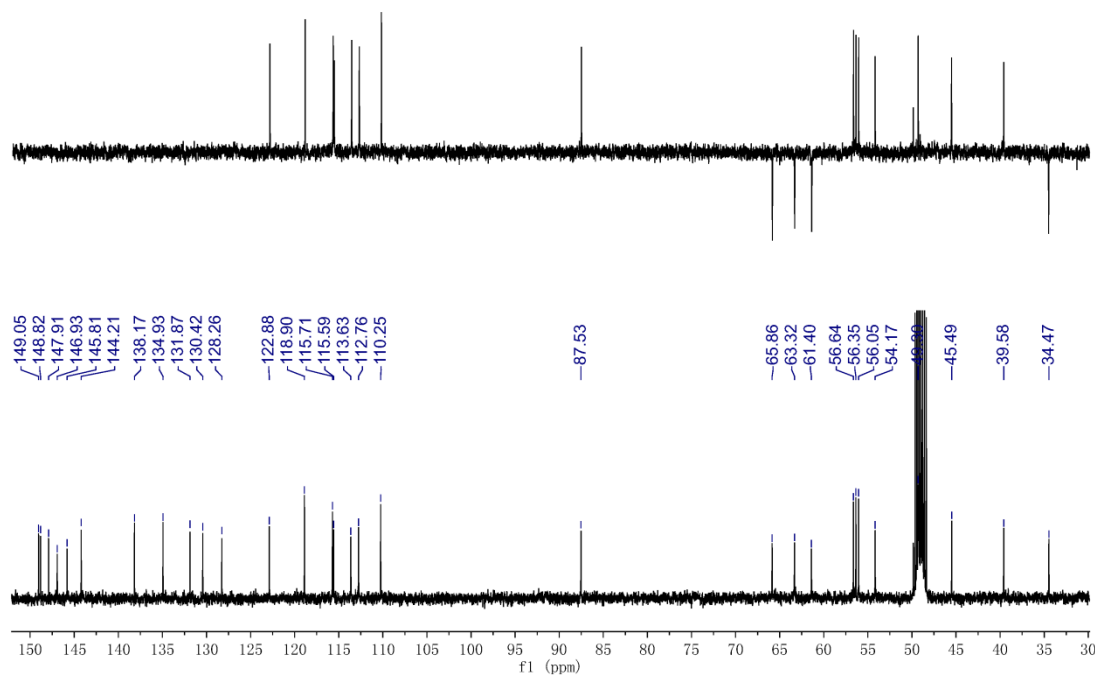



### HSQC of compound 4

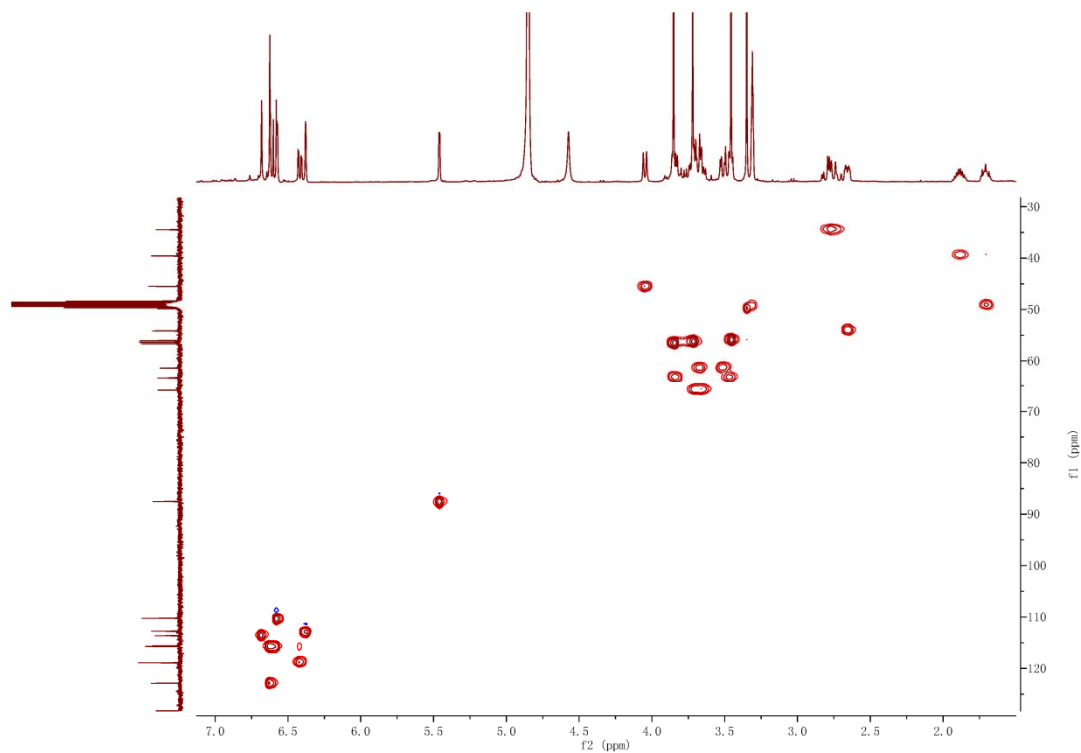

### HMBC of compound 4

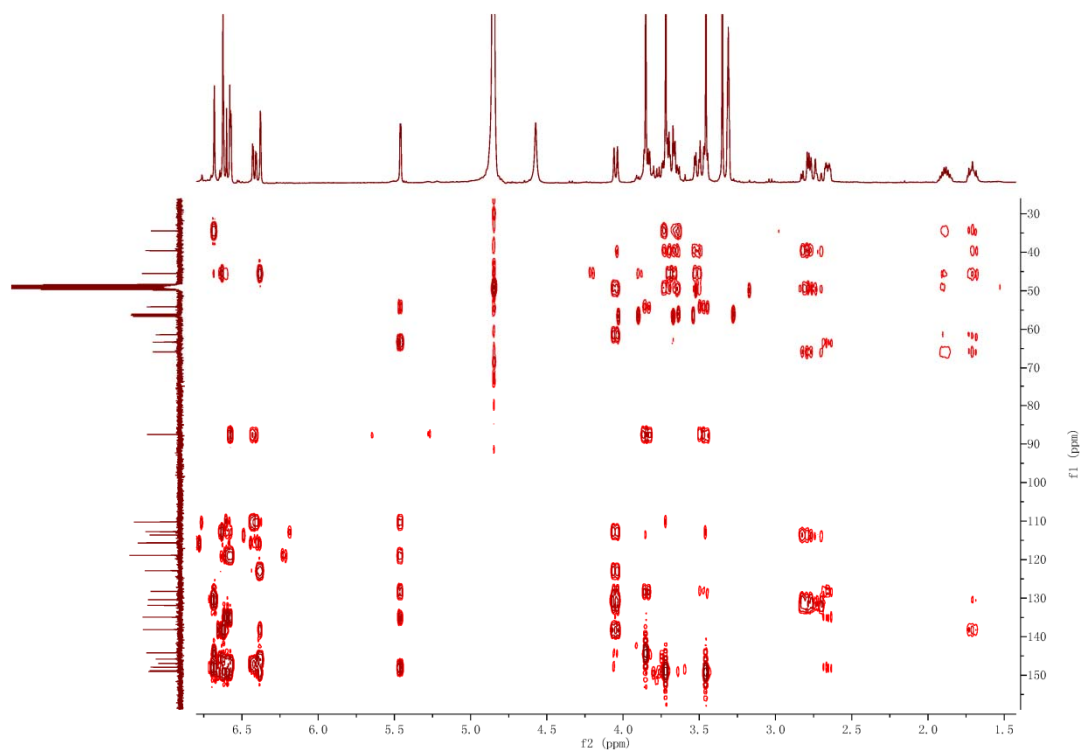

### $^1\text{H}$ - $^1\text{H}$ COSY of compound 4

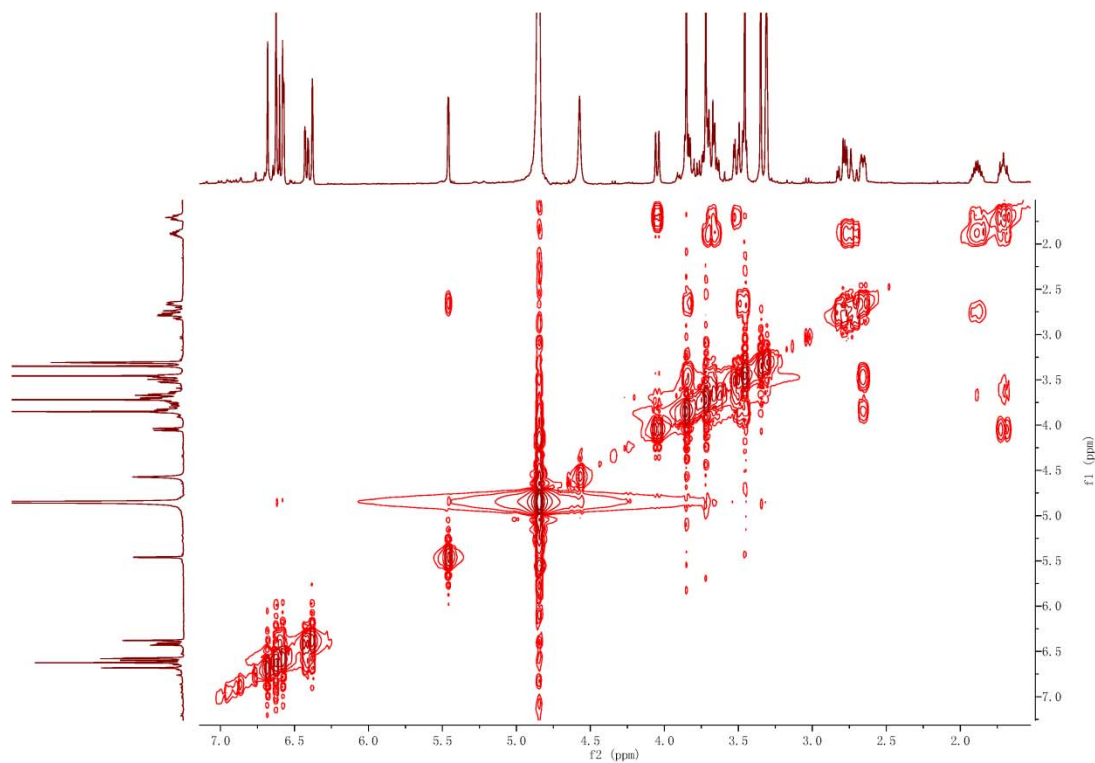

### NOESY of compound 4

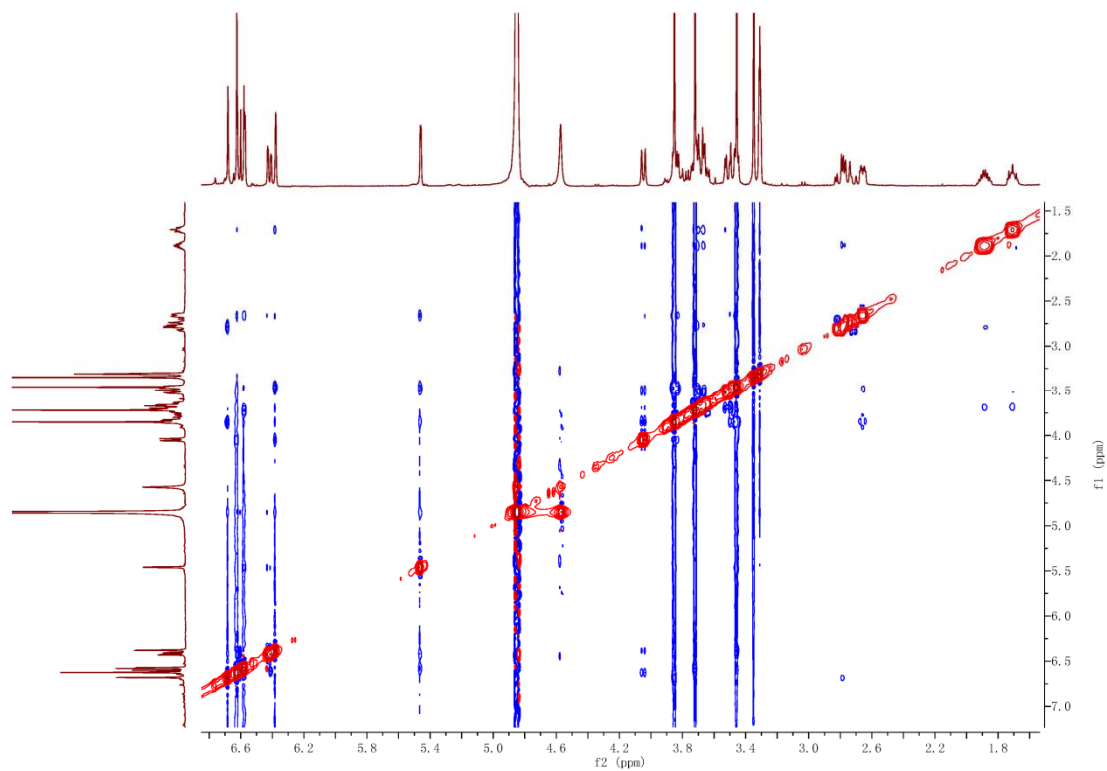

## HRESIMS of compound 5

T: FTMS + p ESI Full ms [50.00-1500.00]

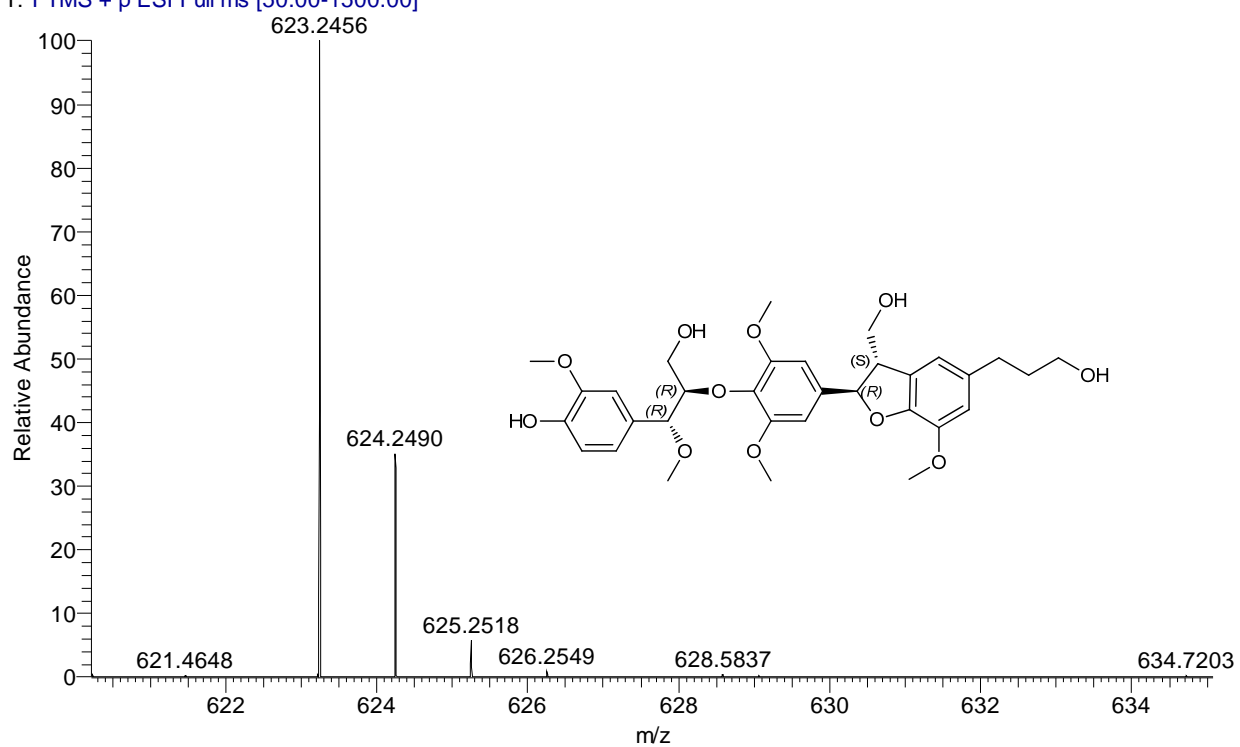

## UV spectrum of compound 5

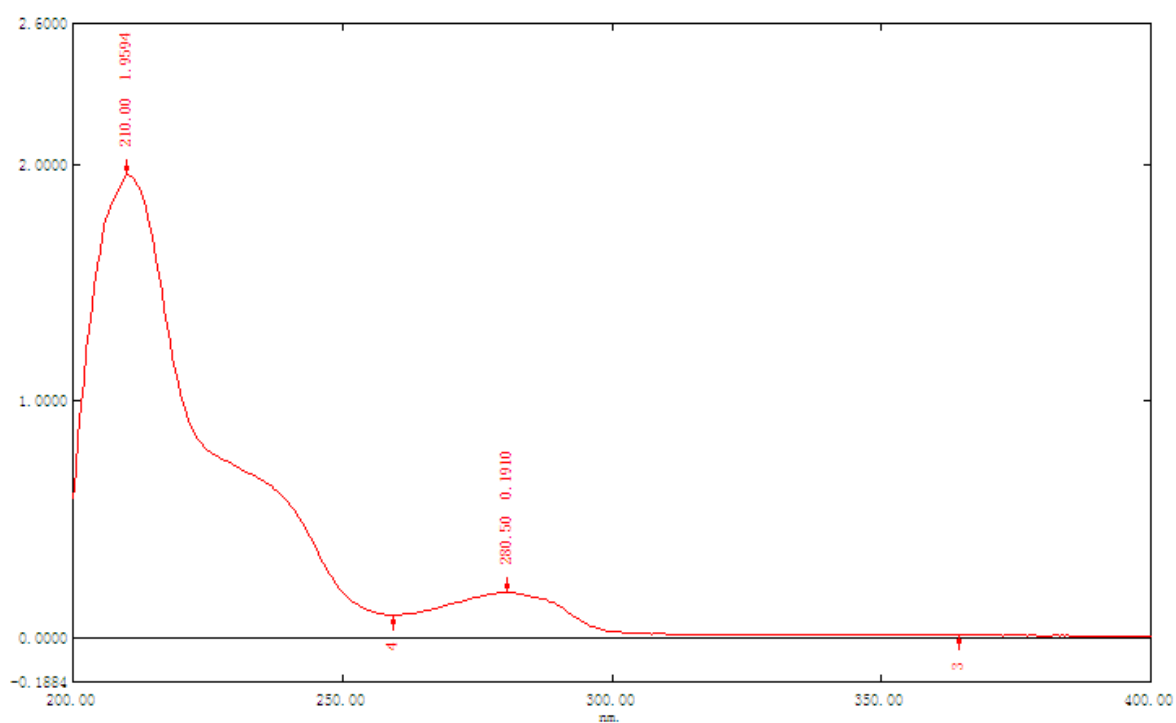

## IR spectrum of compound 5

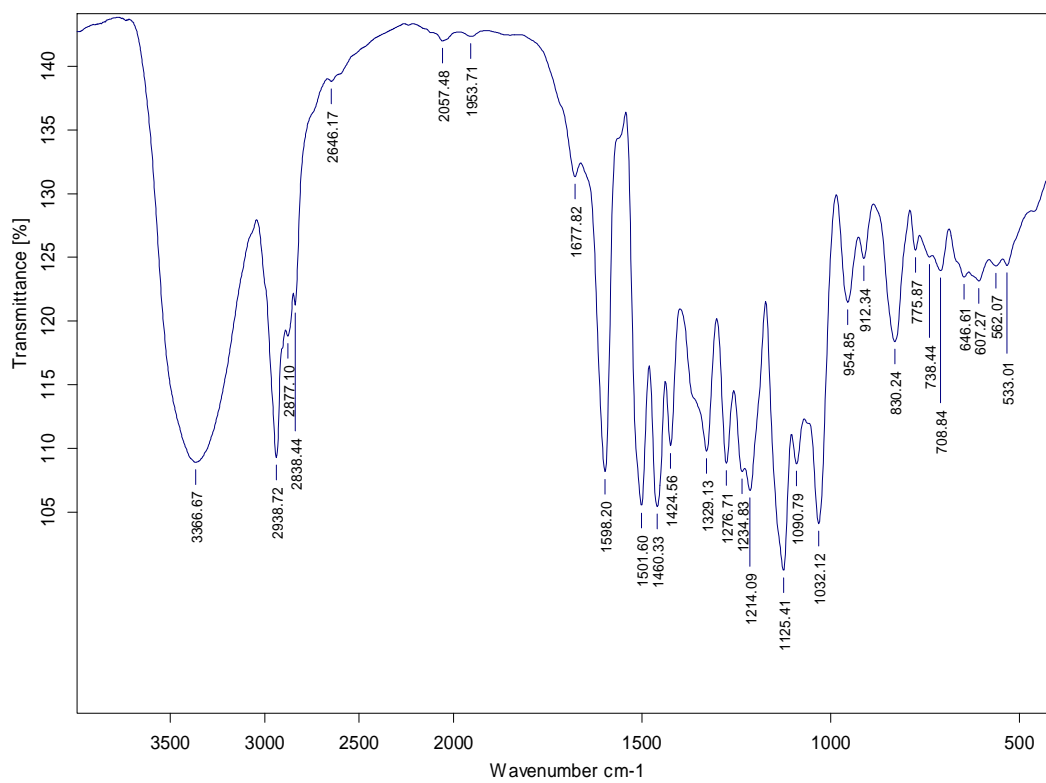

## <sup>1</sup>H NMR of compound 5

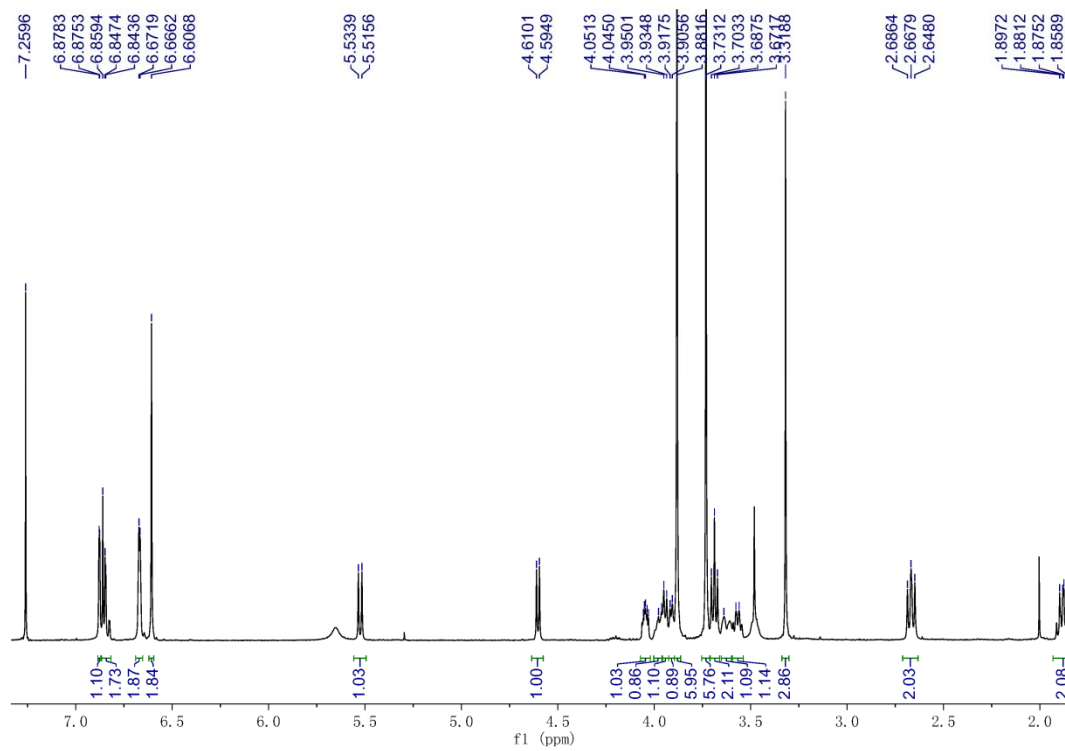

## <sup>13</sup>C NMR and DEPT of compound 5

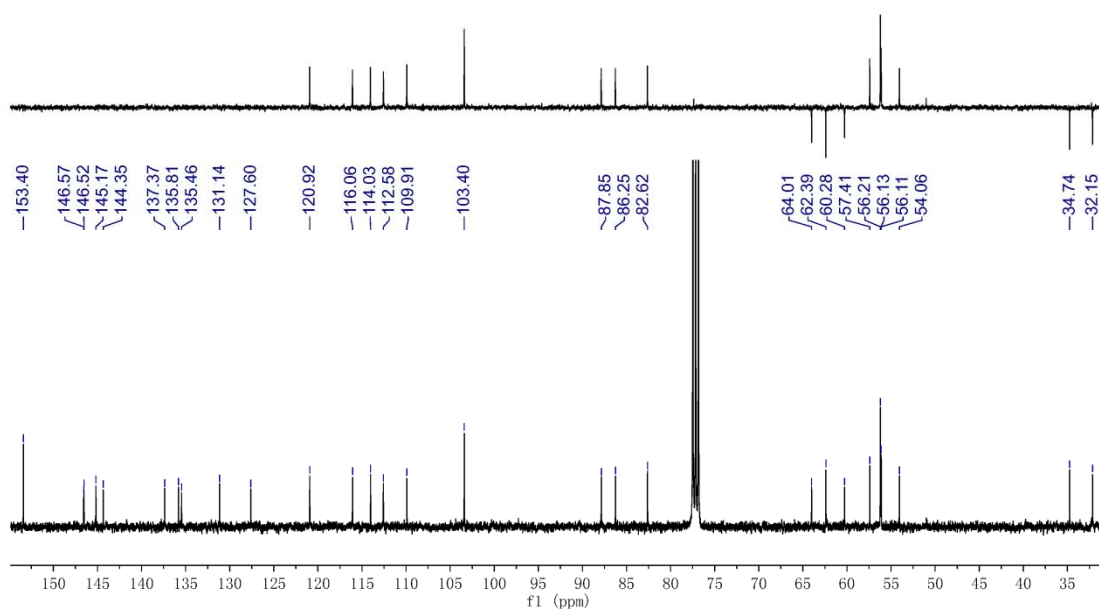

## HSQC of compound 5

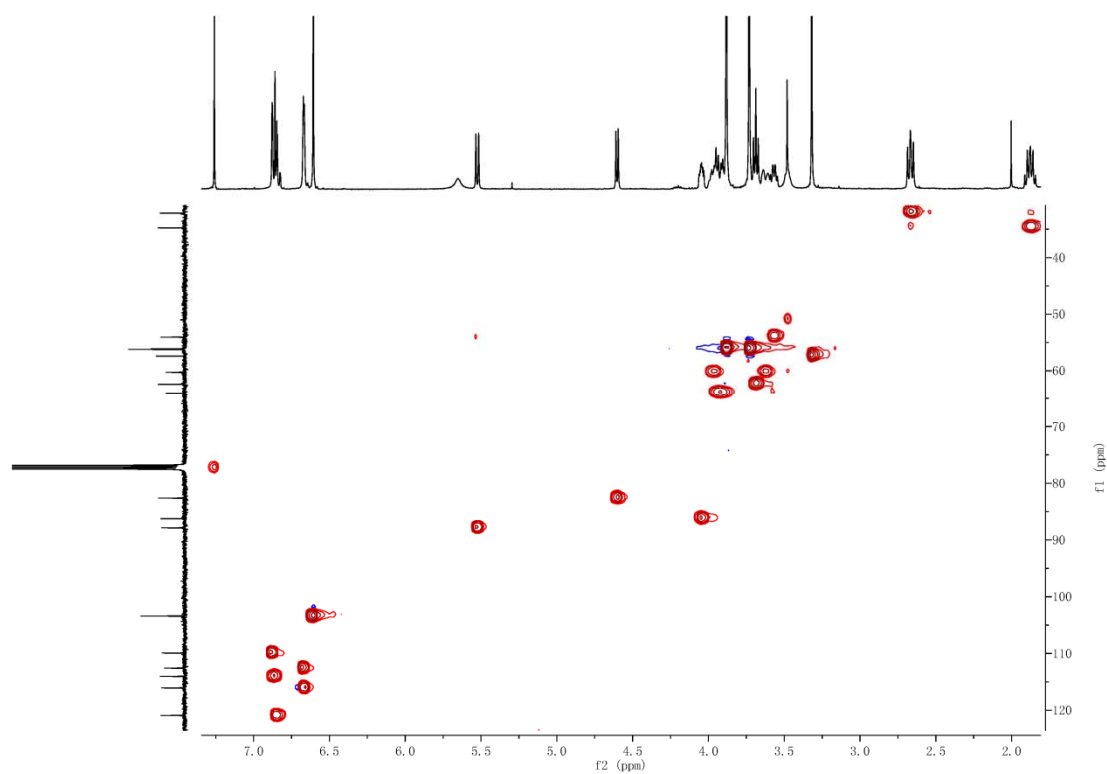

### HMBC of compound 5

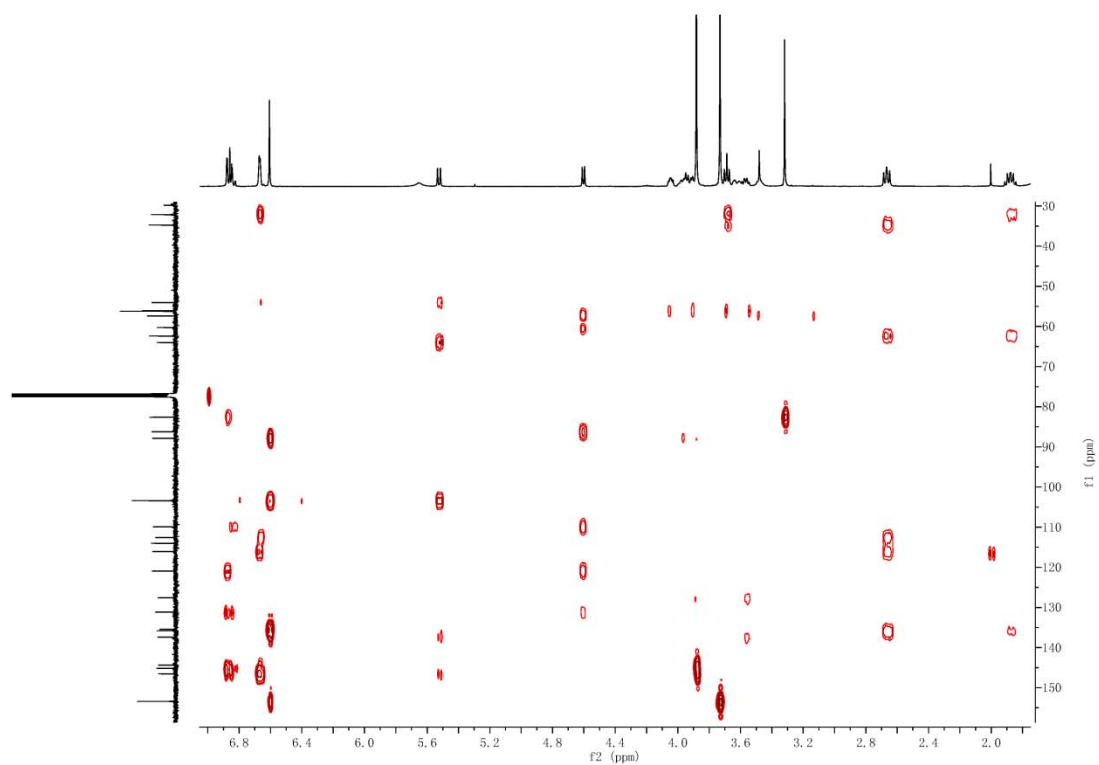

### $^1\text{H}$ - $^1\text{H}$ COSY of compound 5

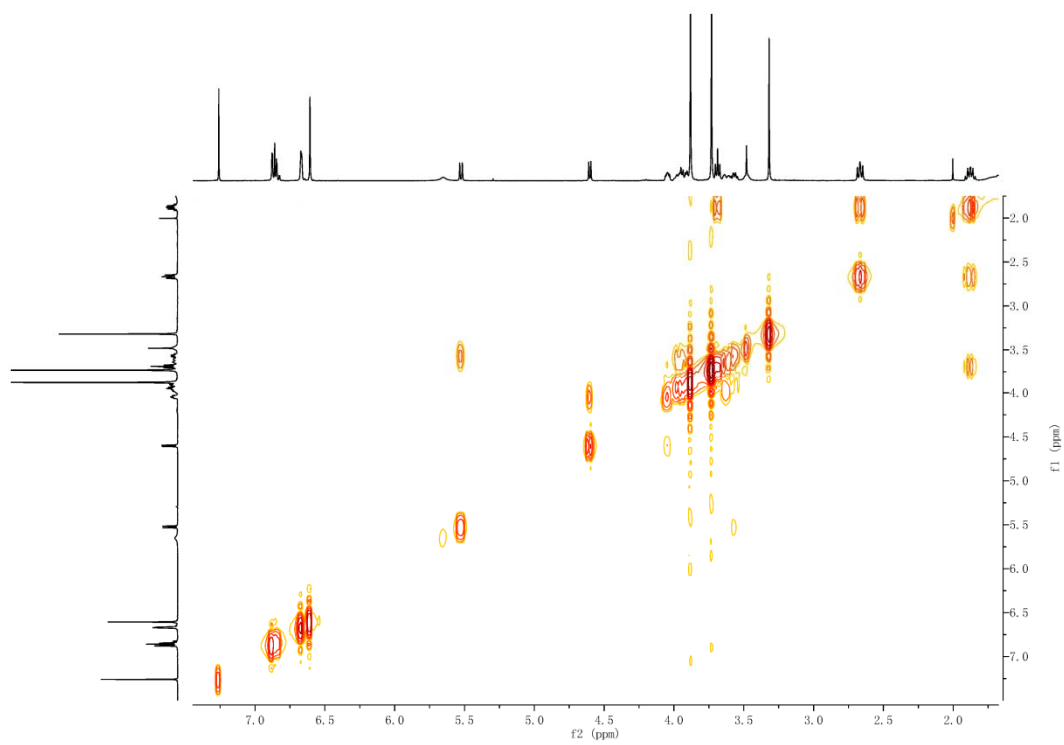

## NOESY of compound 5

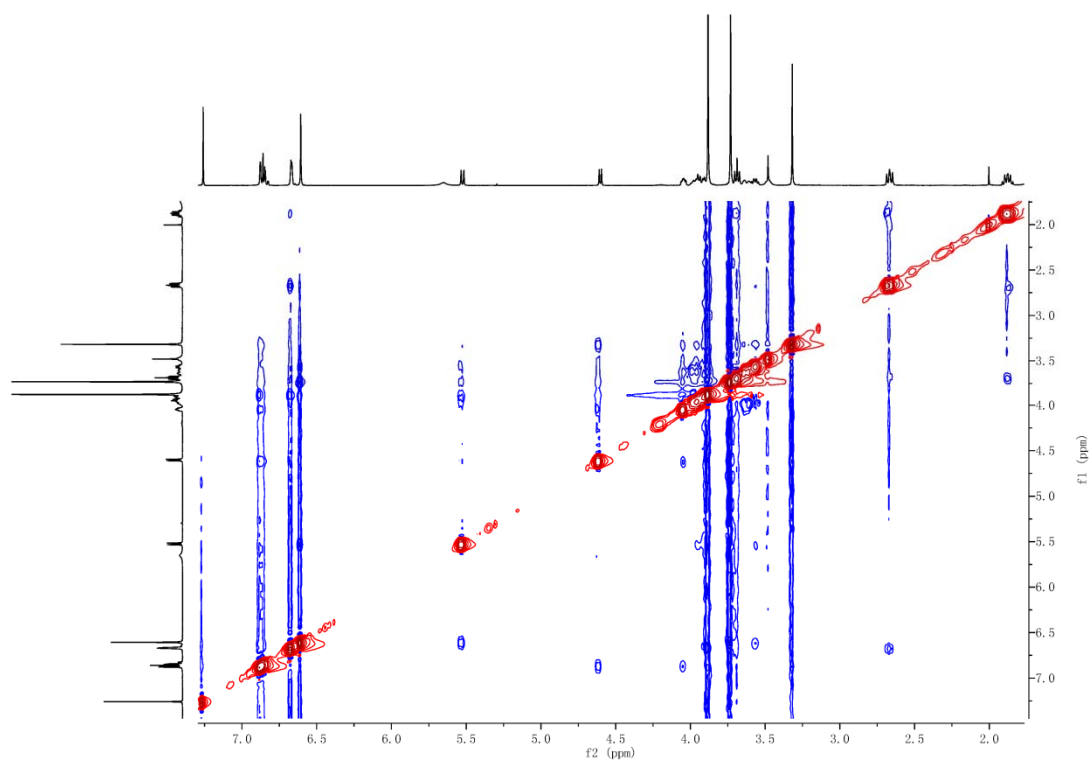

## $^1\text{H}$ NMR of compound 5 in Acetone- $d_6$ (400 MHz)

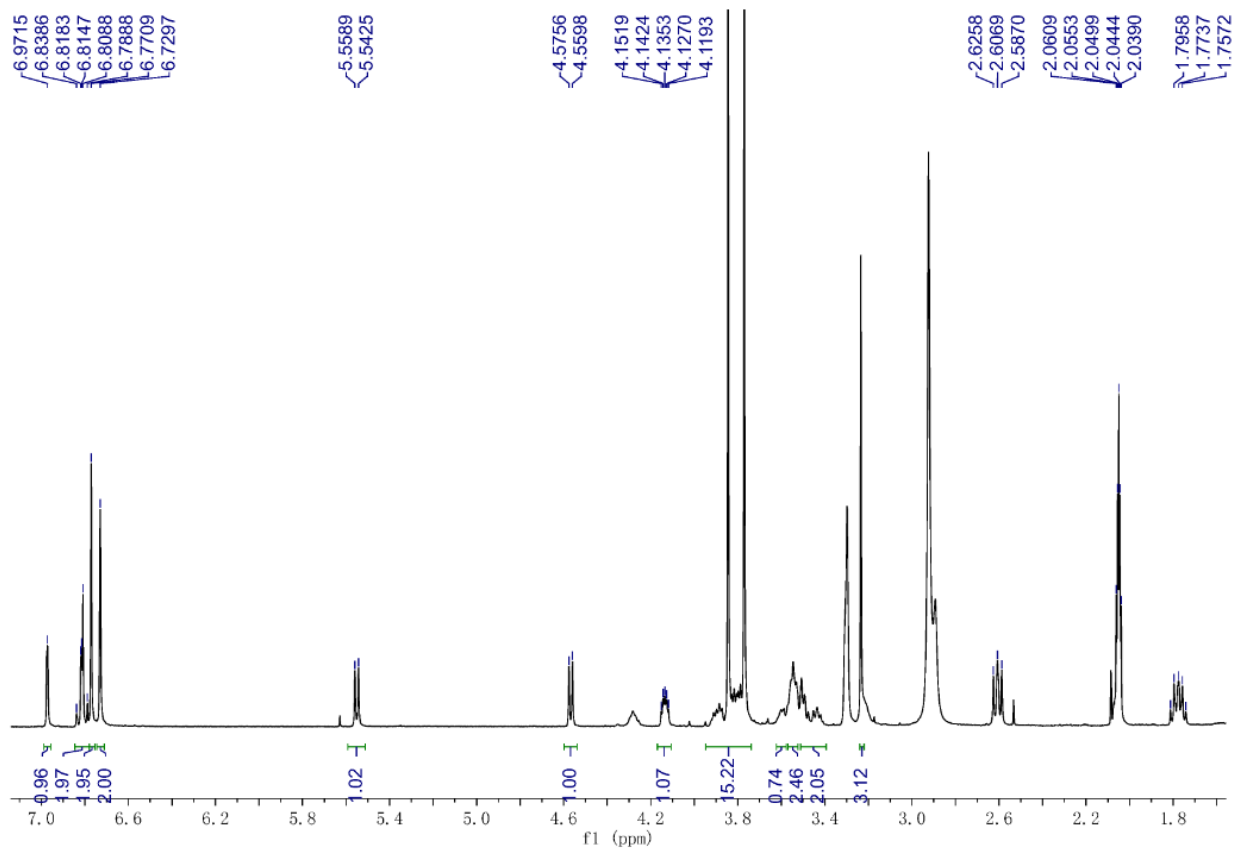

## HRESIMS of compound 6

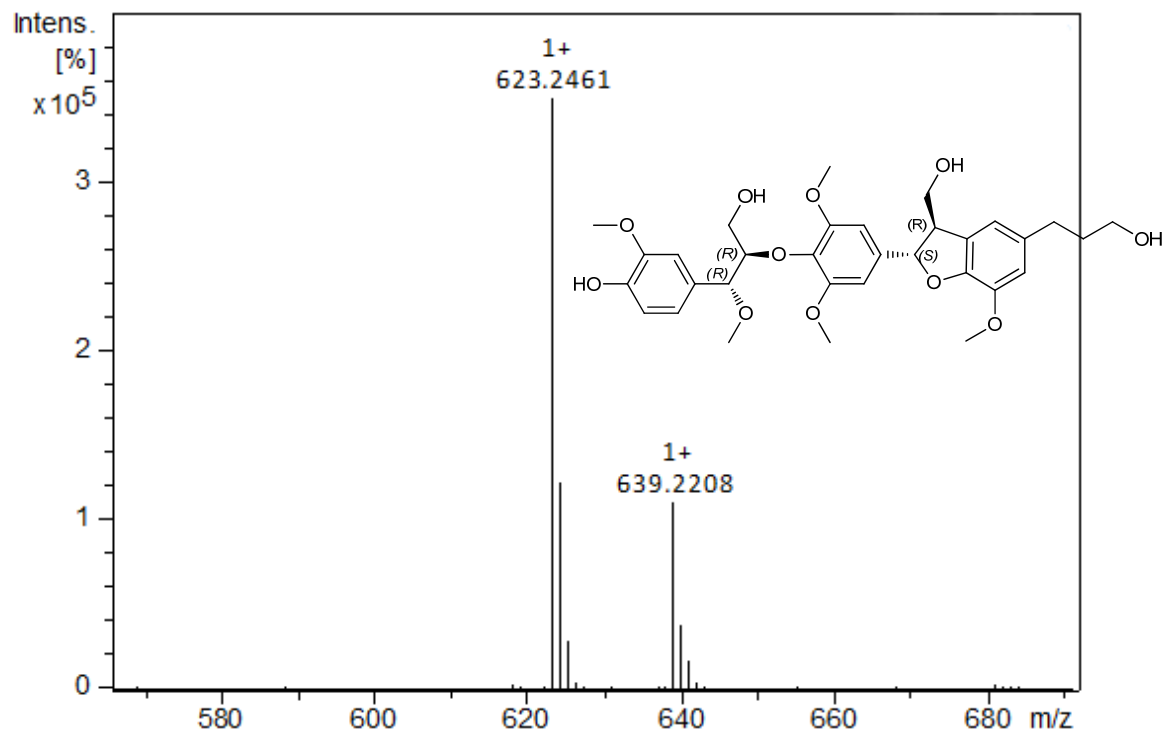

## UV spectrum of compound 6

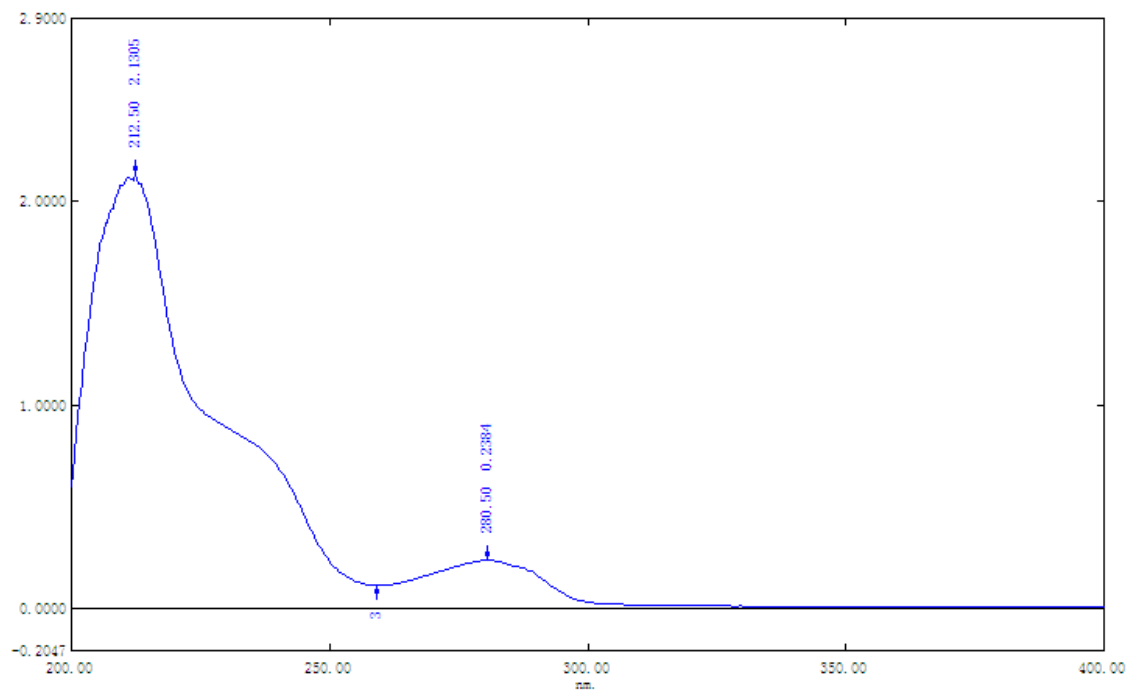



## IR spectrum of compound 6

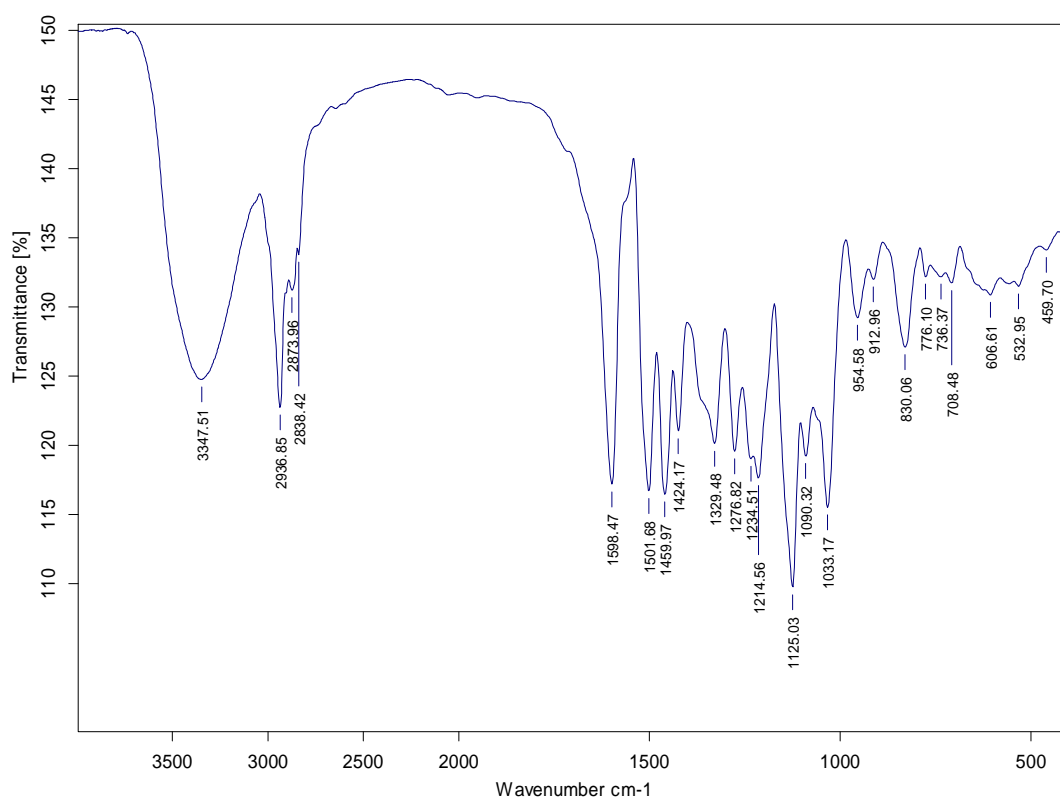

## <sup>1</sup>H NMR of compound 6

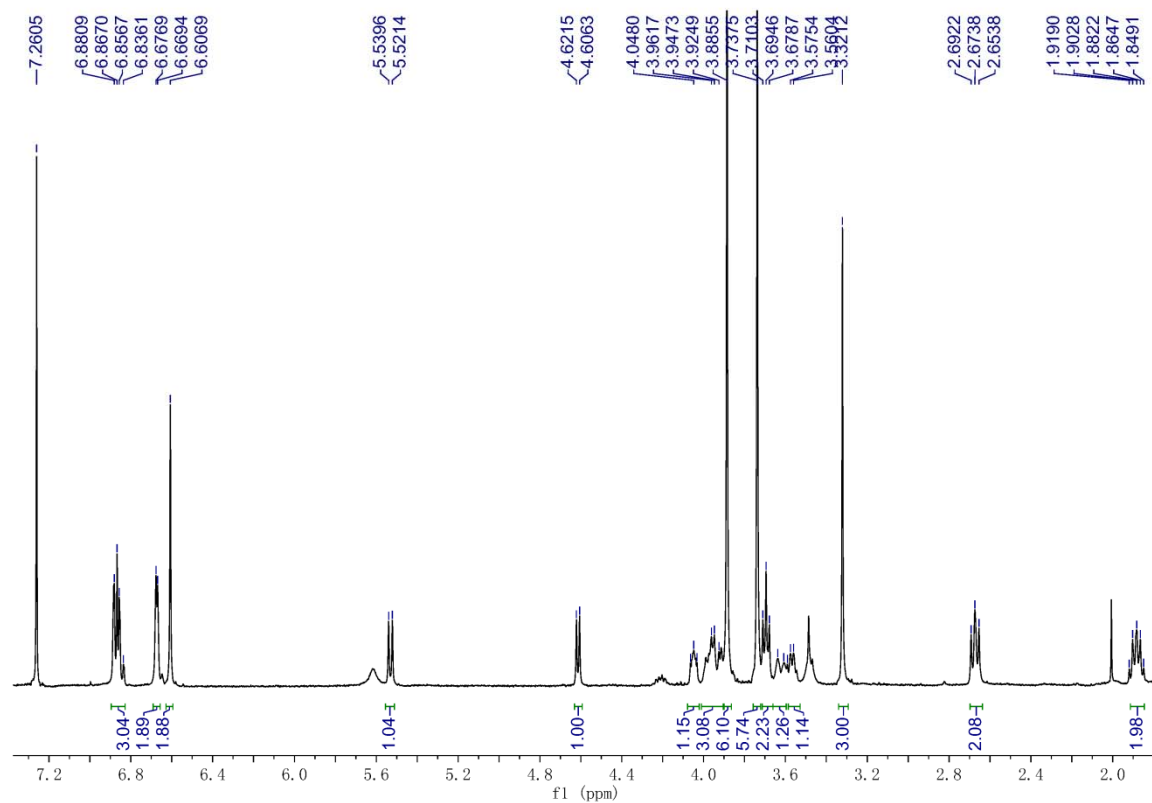

# <sup>13</sup>C NMR and DEPT of compound 6

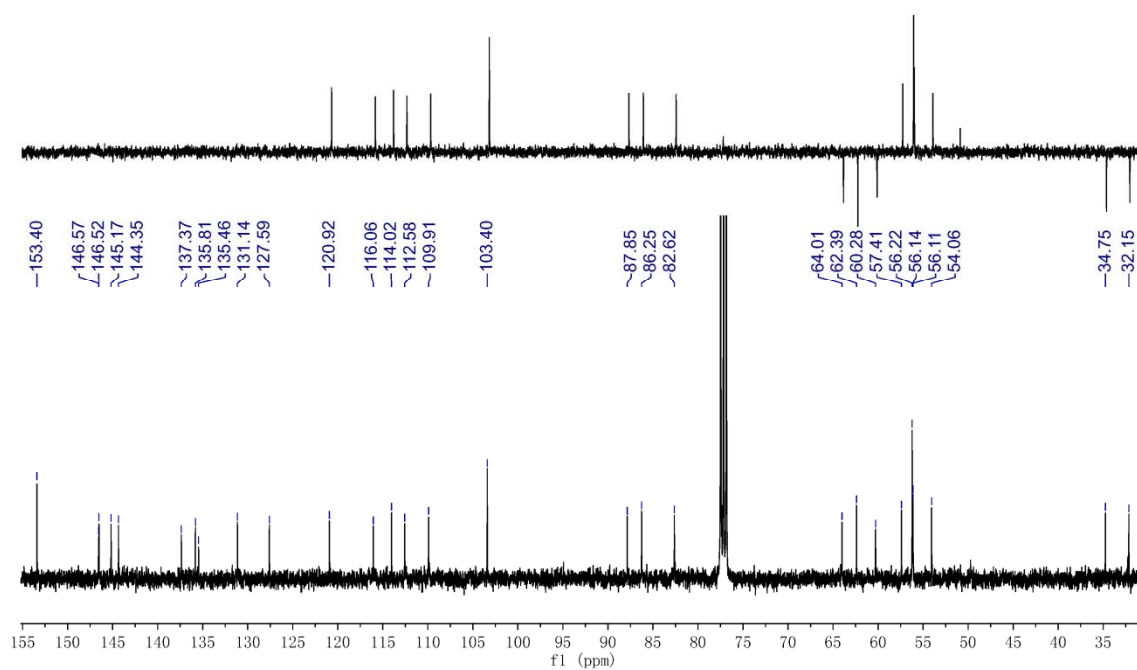

# HSQC of compound 6

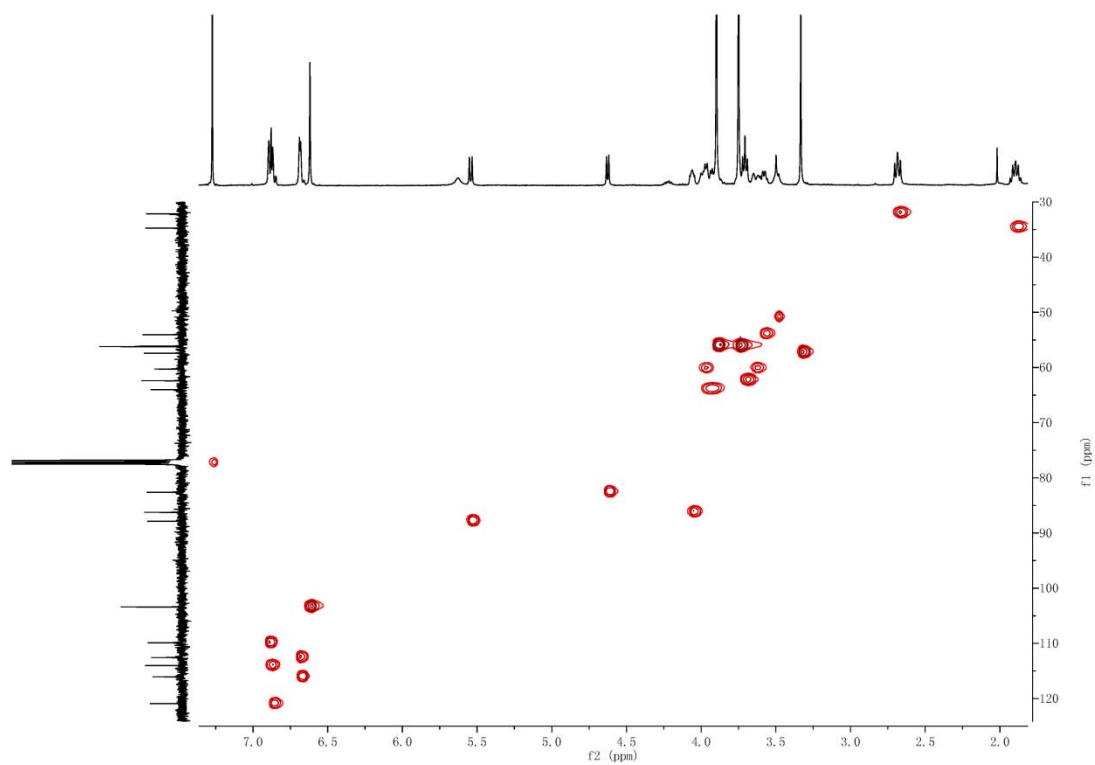

### HMBC of compound 6

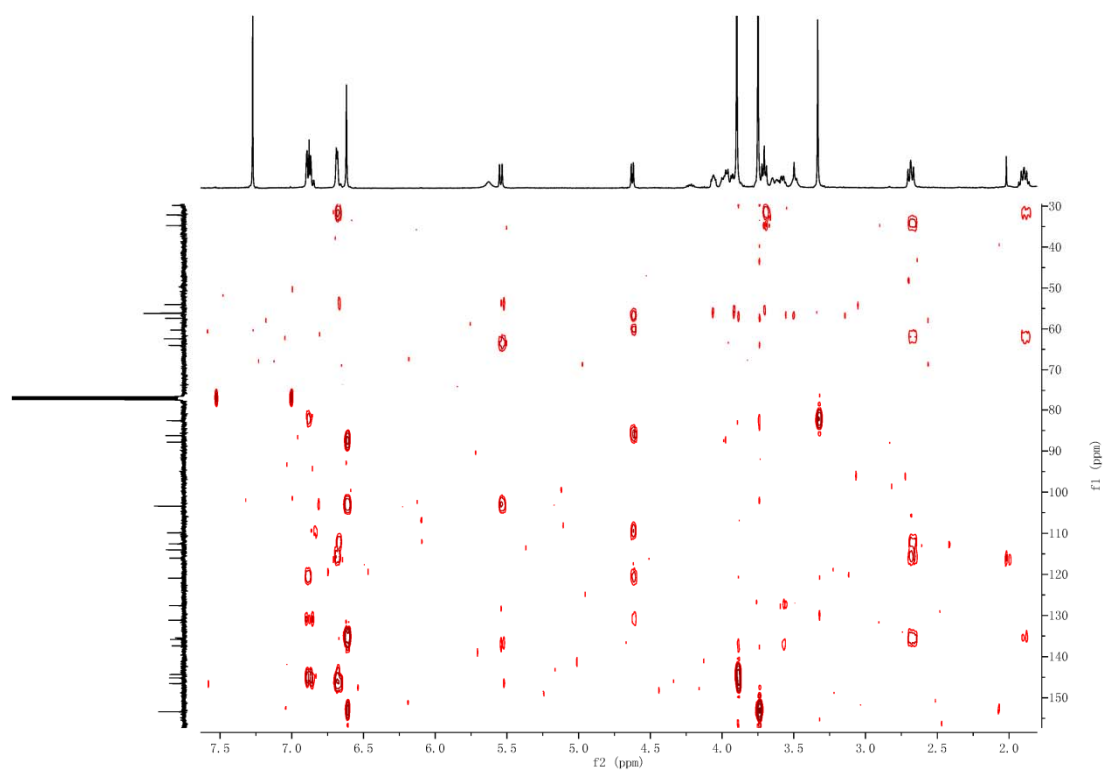

### $^1\text{H}$ - $^1\text{H}$ COSY of compound 6

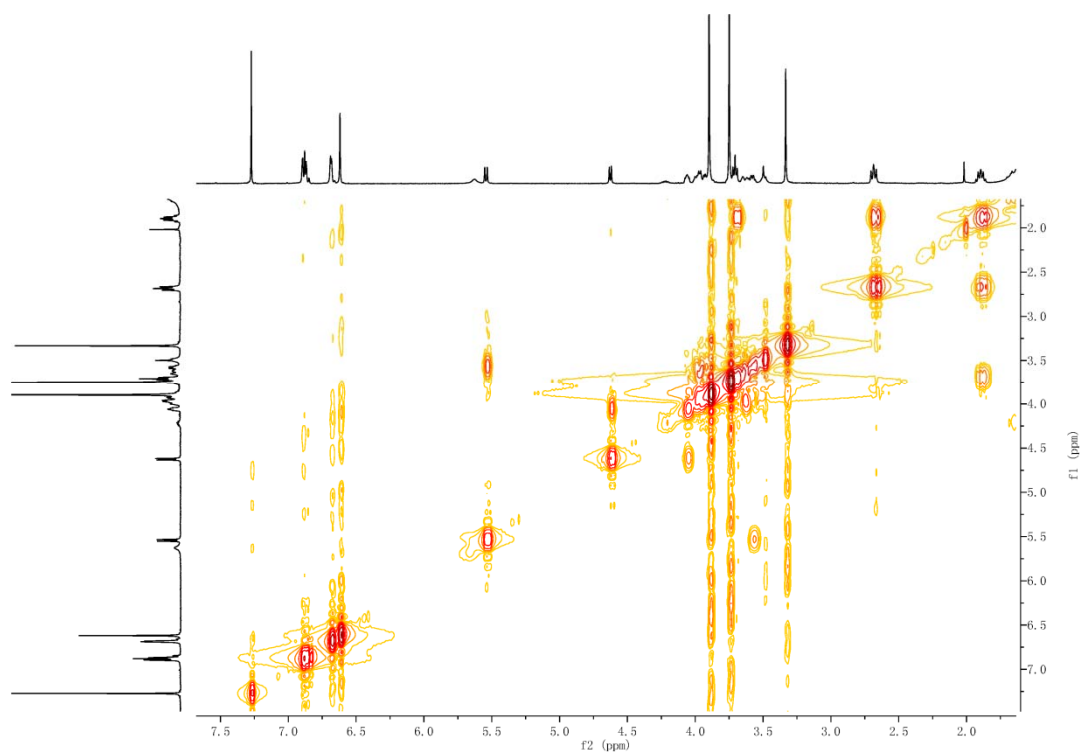

## NOESY of compound 6

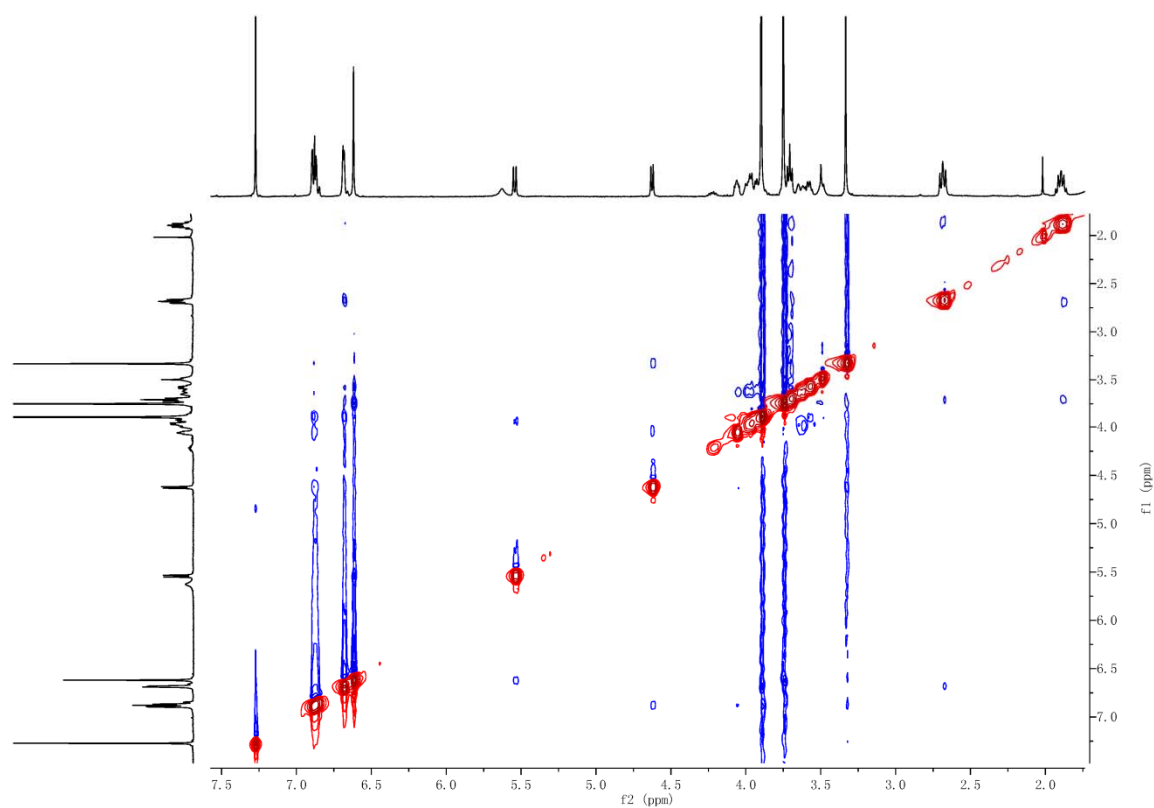

## <sup>1</sup>H NMR of compound 6 in Acetone-*d*<sub>6</sub>(400 MHz)

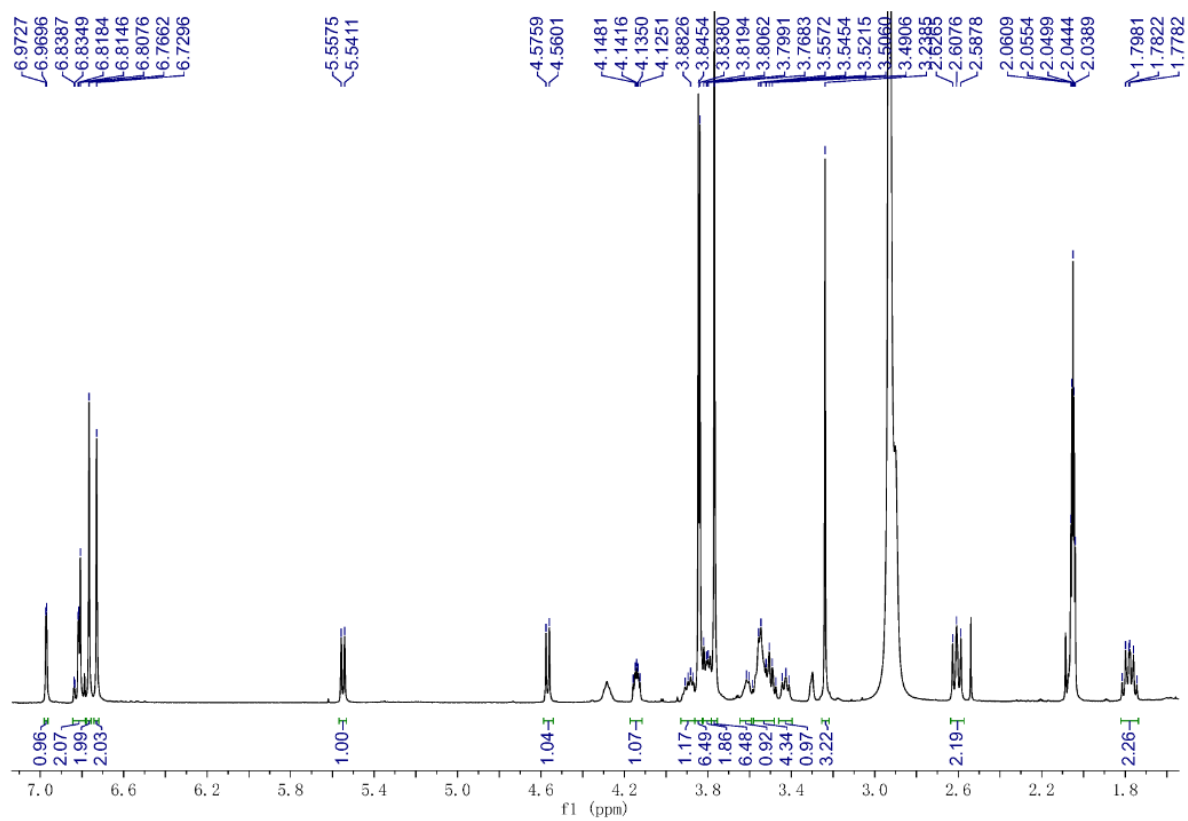

### HRESIMS of compound 7

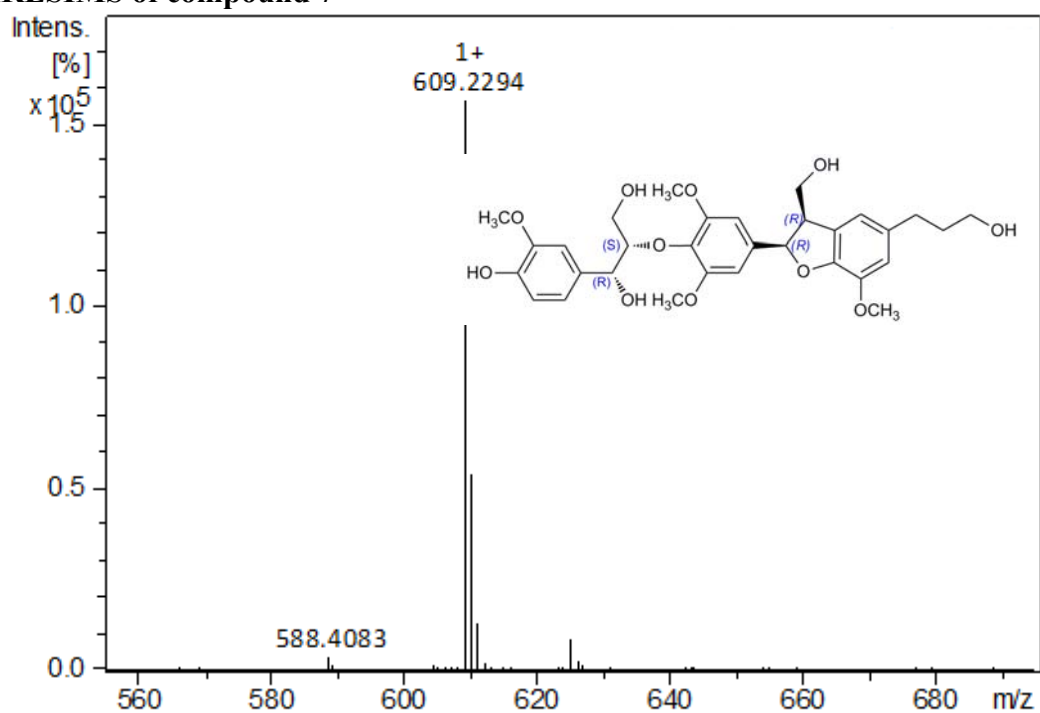

### UV spectrum of compound 7

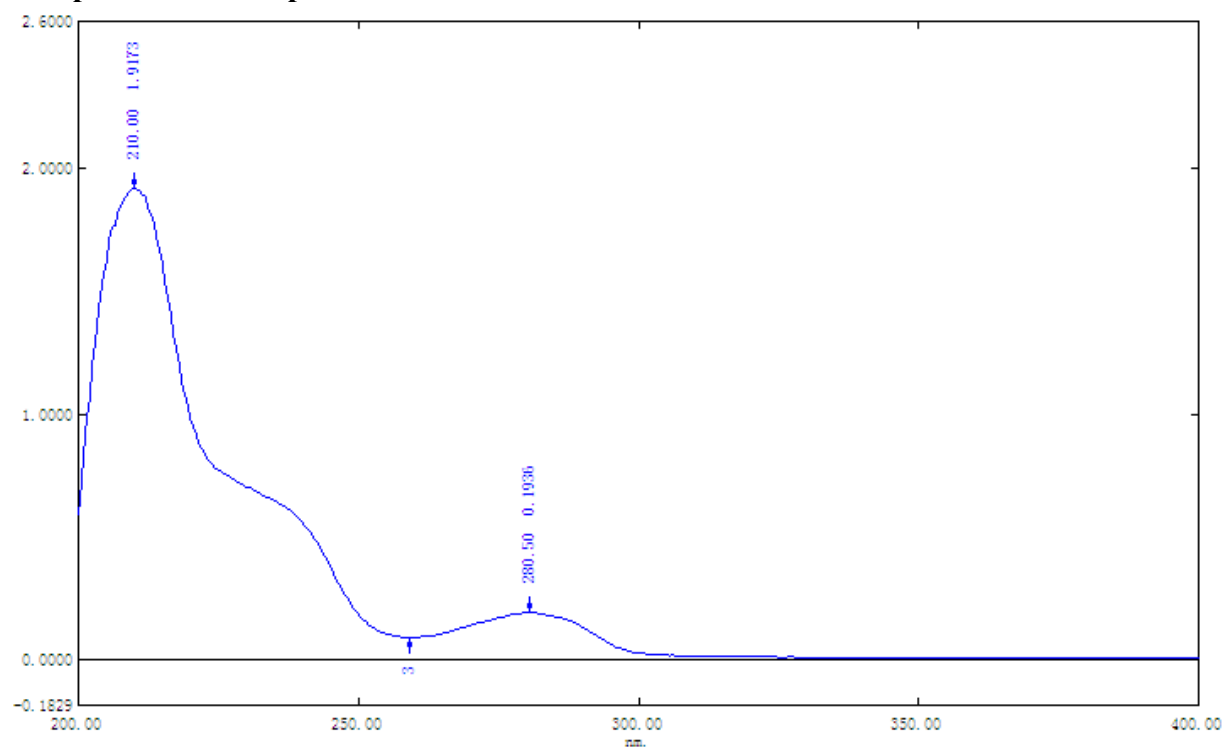

## IR spectrum of compound 7

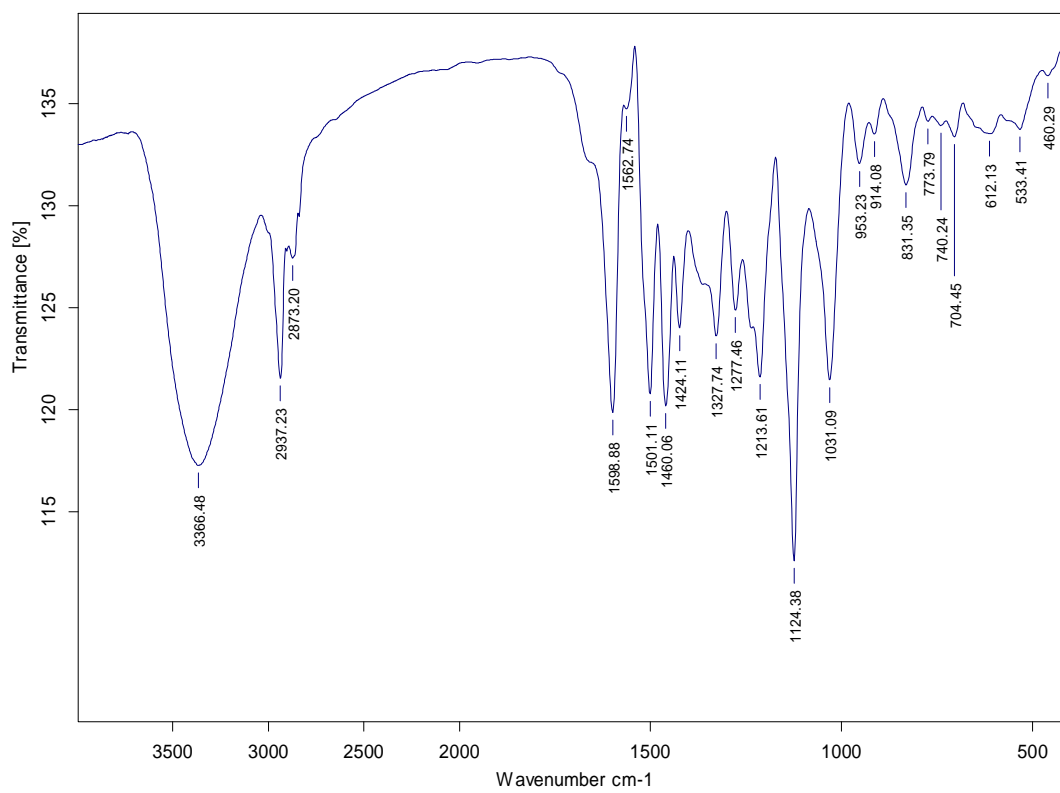

# <sup>1</sup>H NMR of compound 7

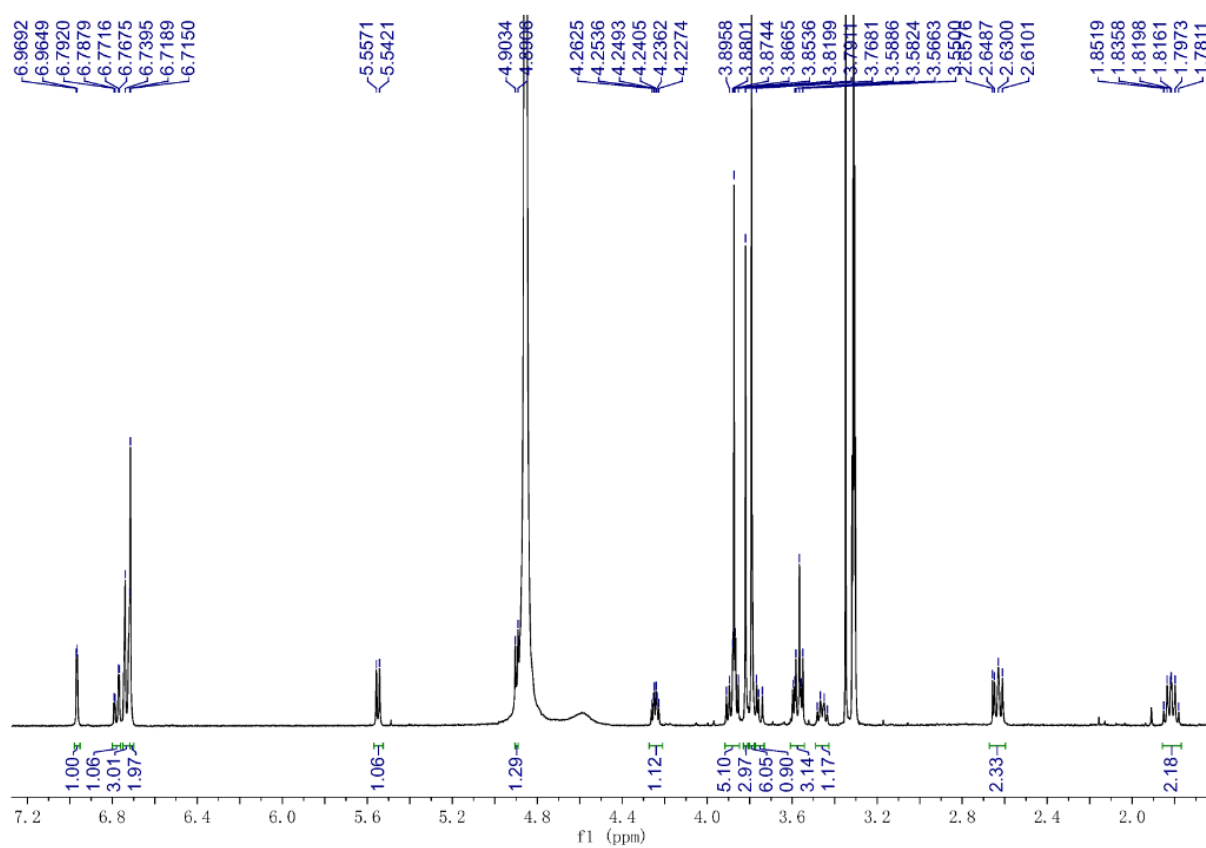





### HMBC of compound 7

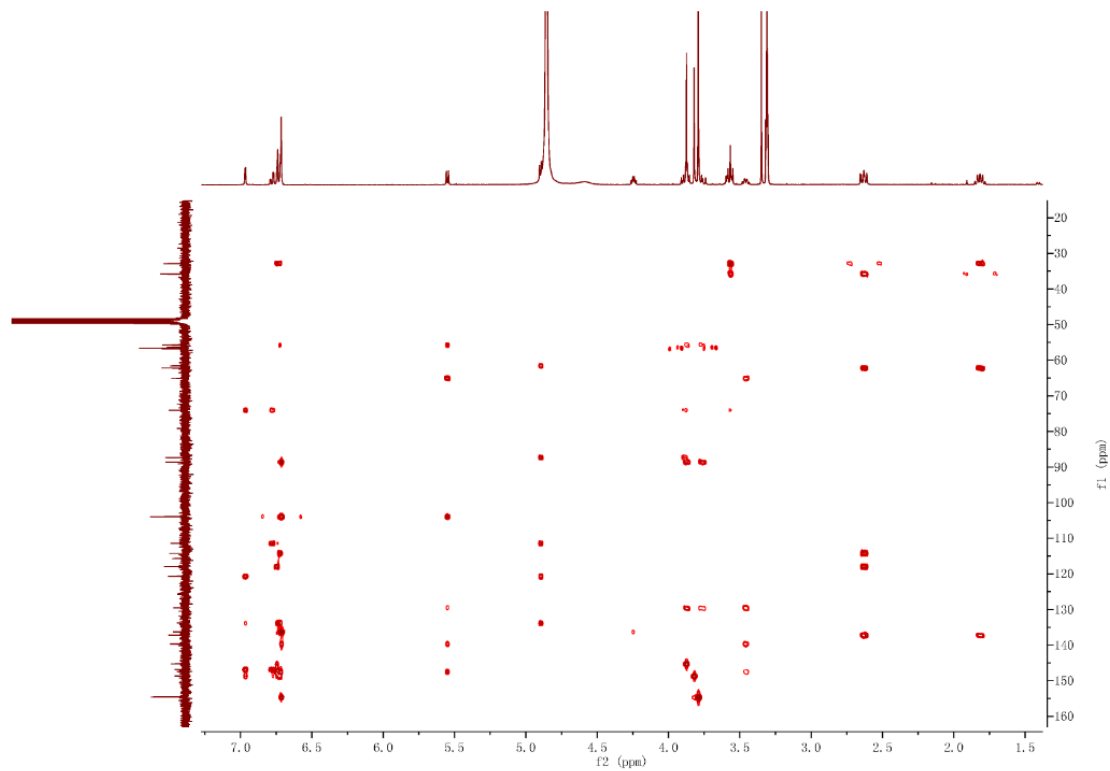

### $^1\text{H}$ - $^1\text{H}$ COSY of compound 7

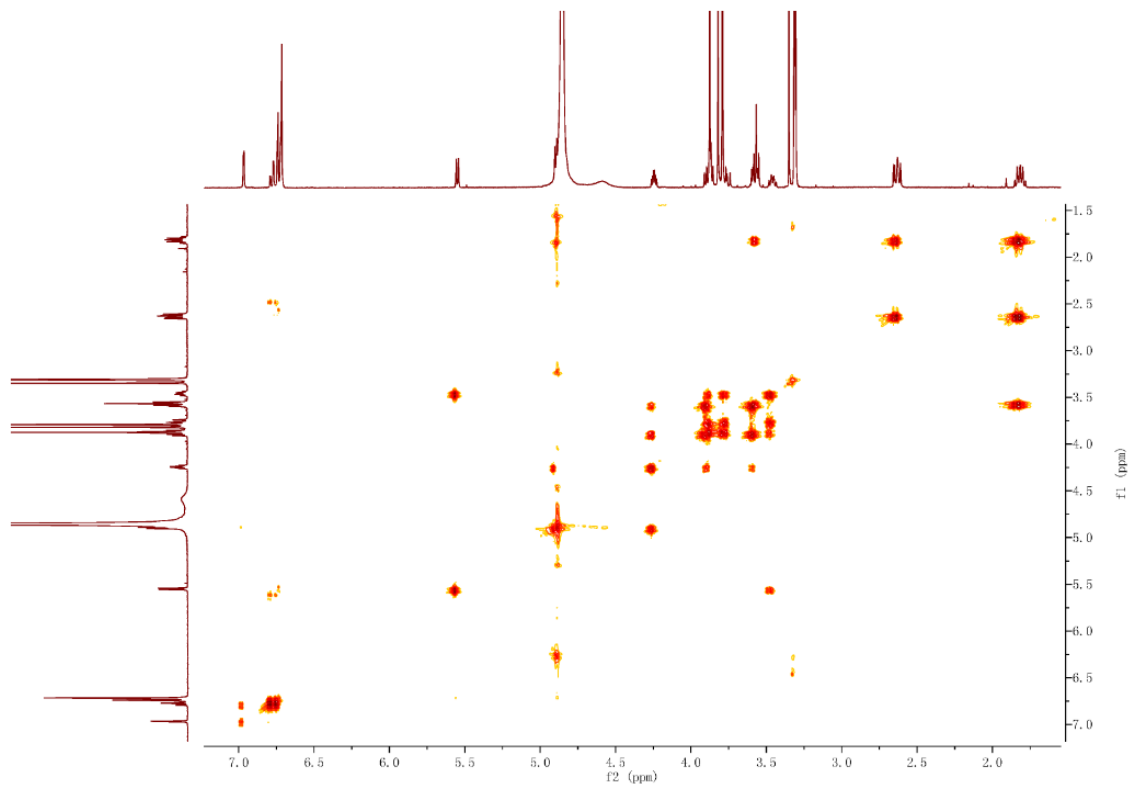

## NOESY of compound 7

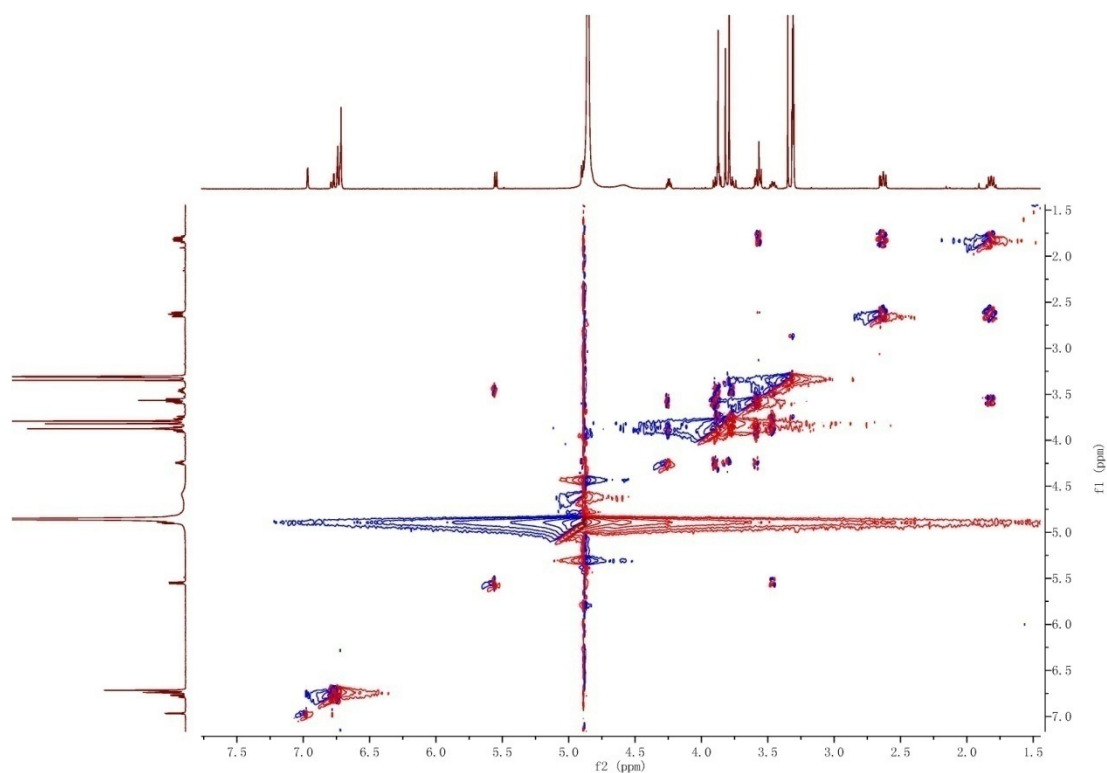

## $^1\text{H}$ NMR of compound 7 in Acetone- $d_6$ (400 MHz)

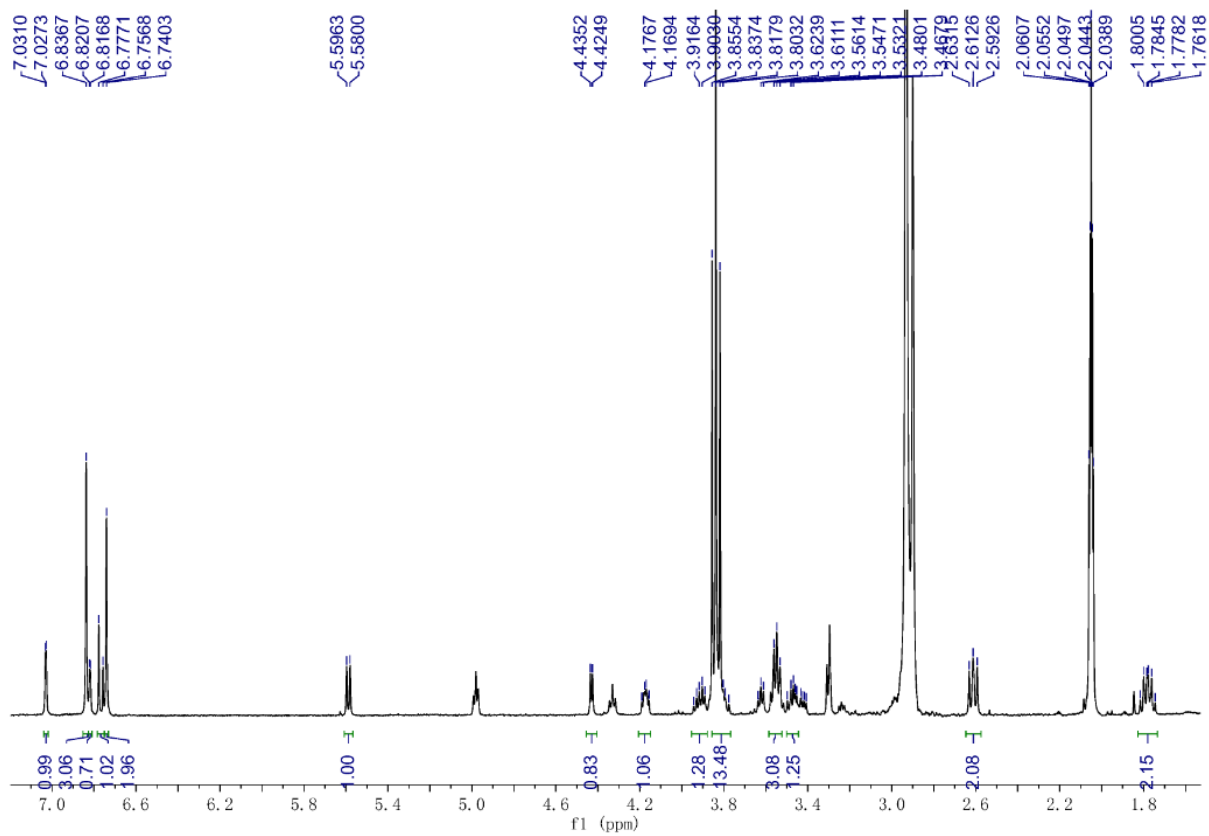

## HRESIMS of compound 8

T: FTMS + p ESI Full ms [50.00-1500.00]

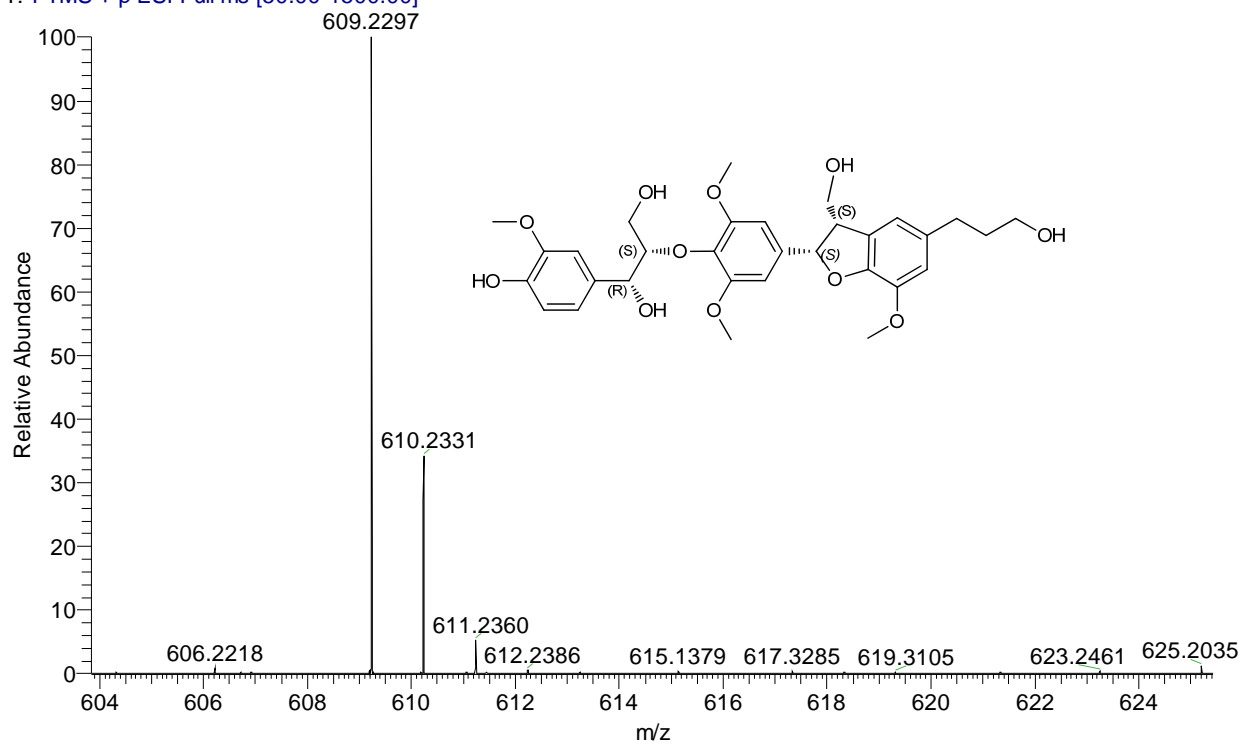

## UV spectrum of compound 8

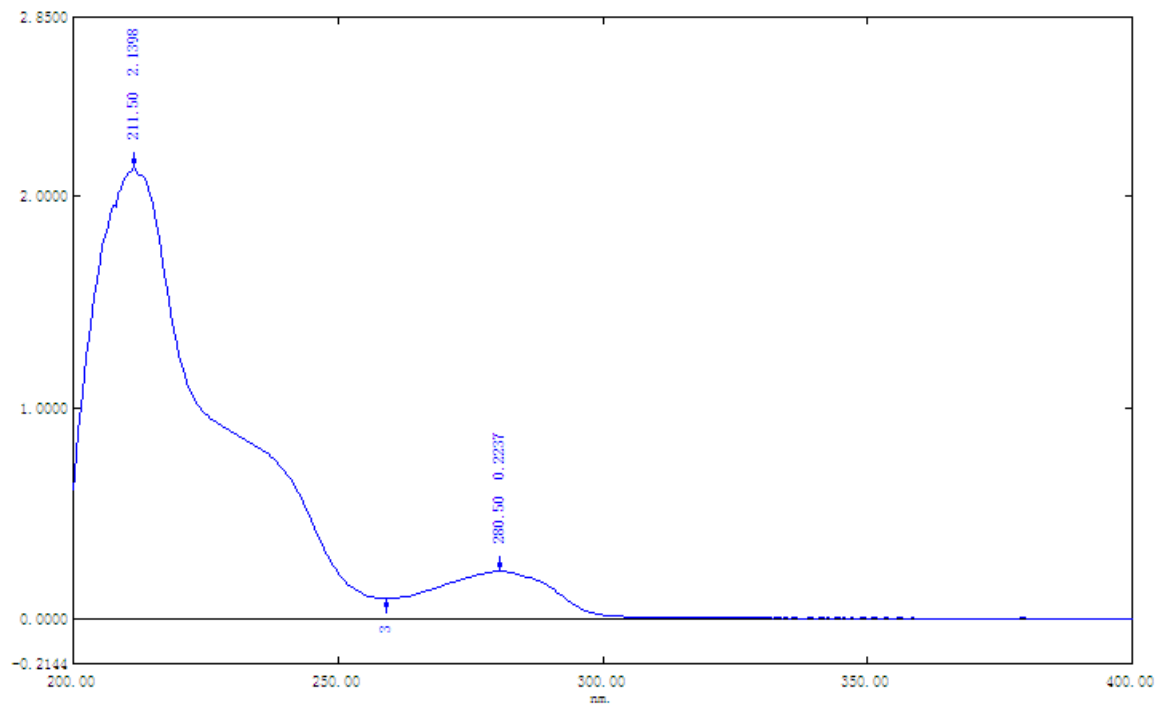

## IR spectrum of compound 8

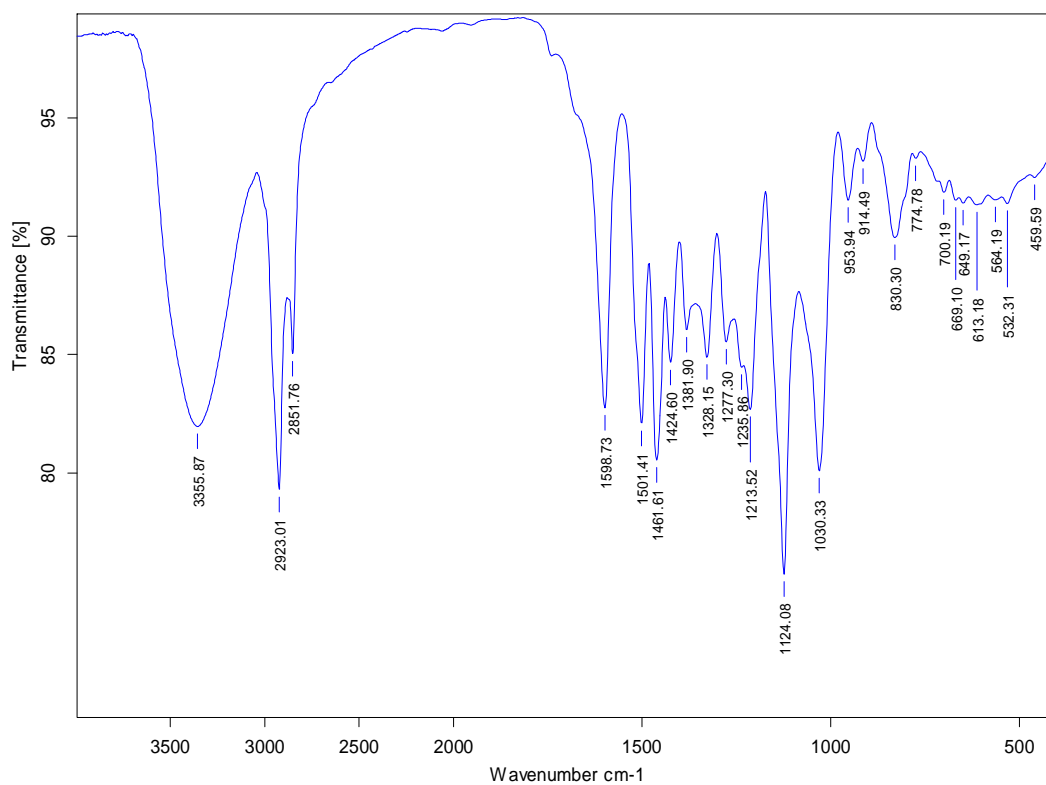

## <sup>1</sup>H NMR of compound 8

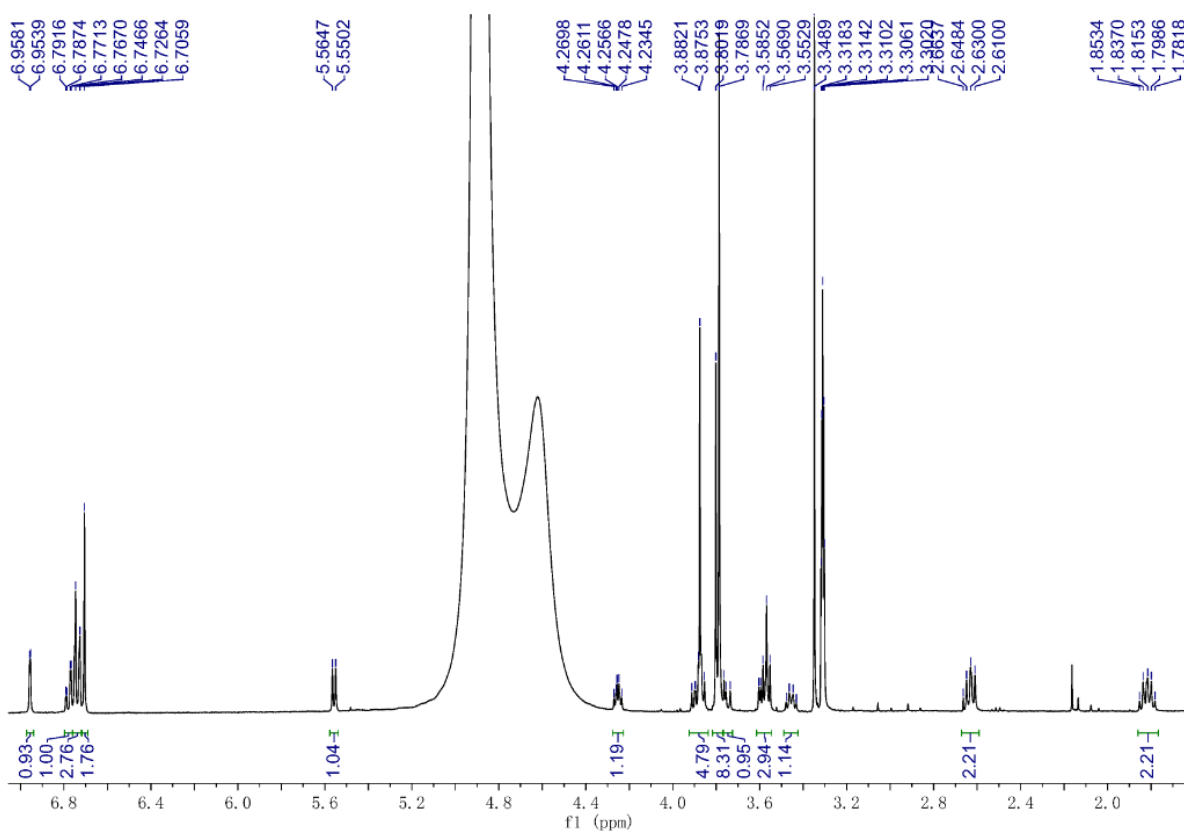

### <sup>13</sup>C NMR and DEPT of compound 8

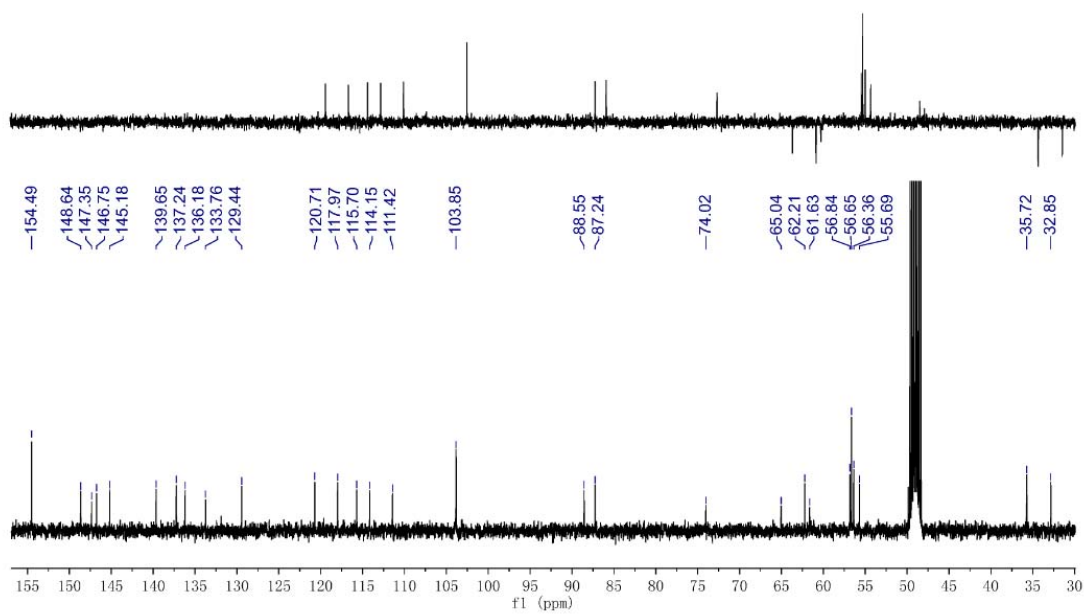

### HSQC of compound 8

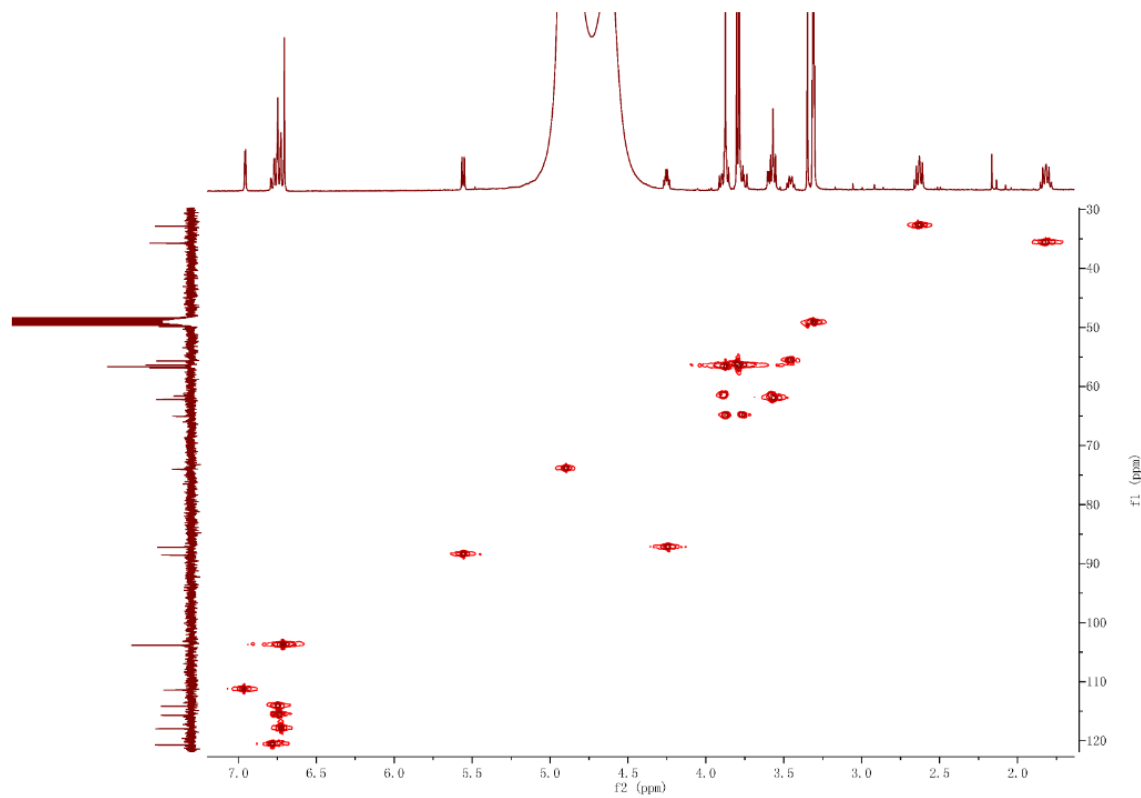

### HMBC of compound 8

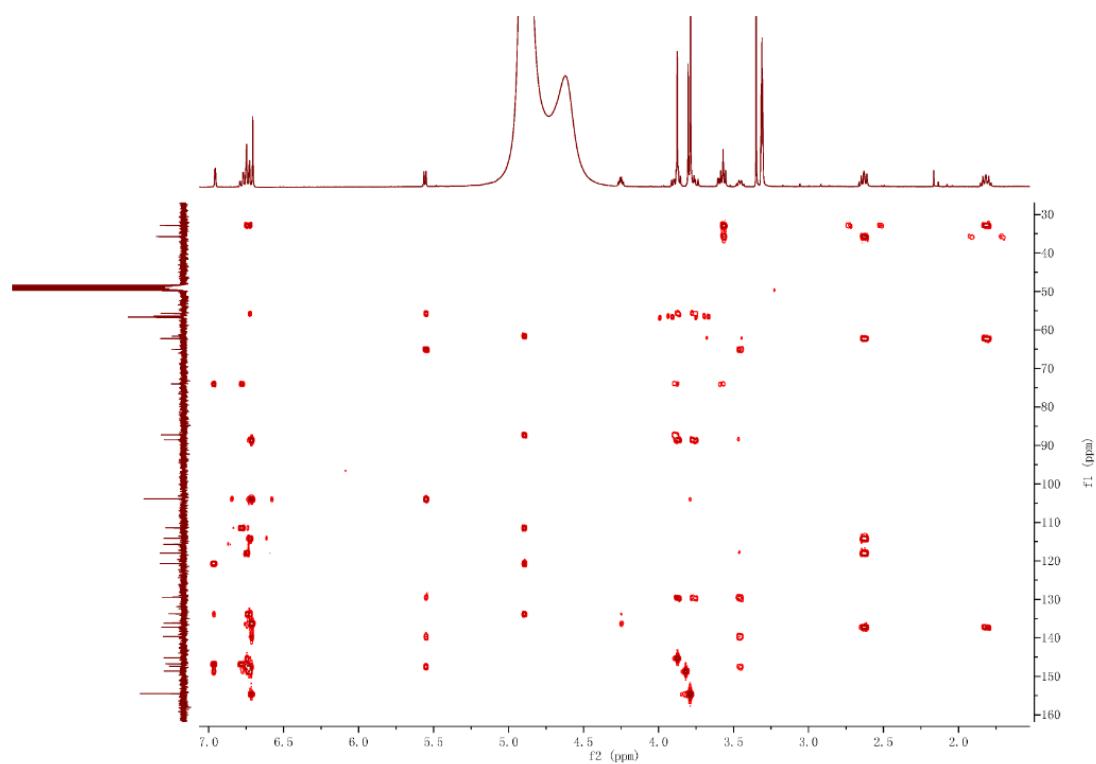

### $^1\text{H}$ - $^1\text{H}$ COSY of compound 8

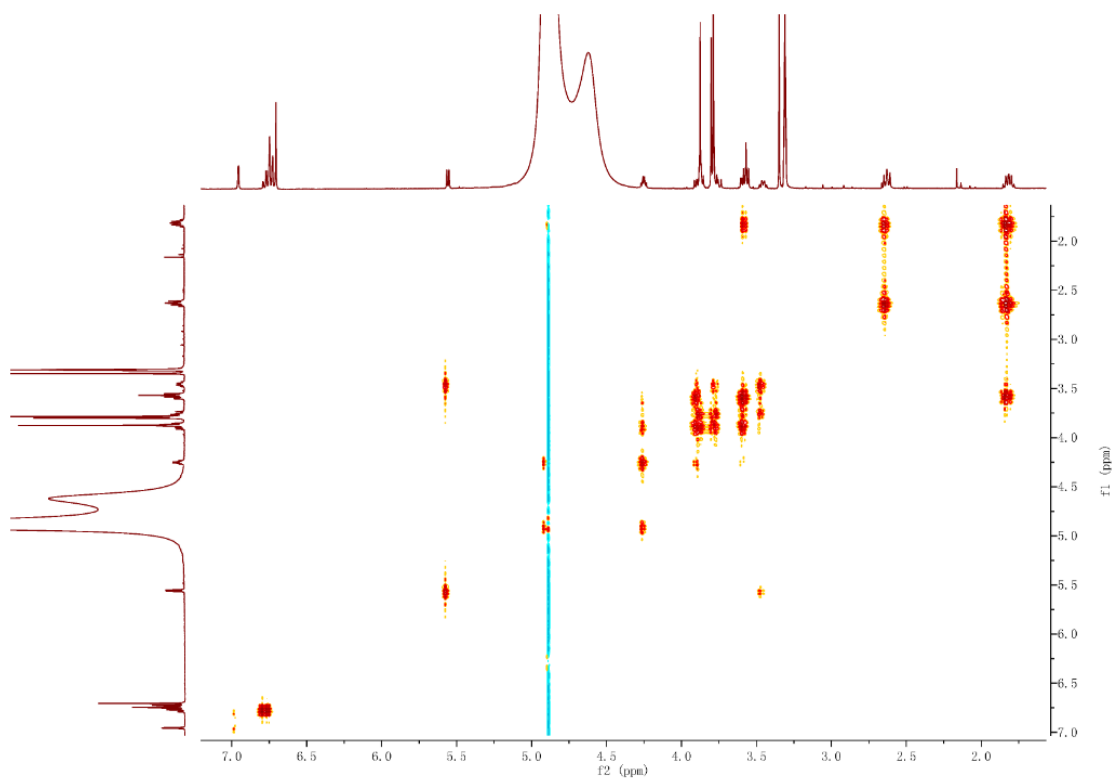

## NOESY of compound 8

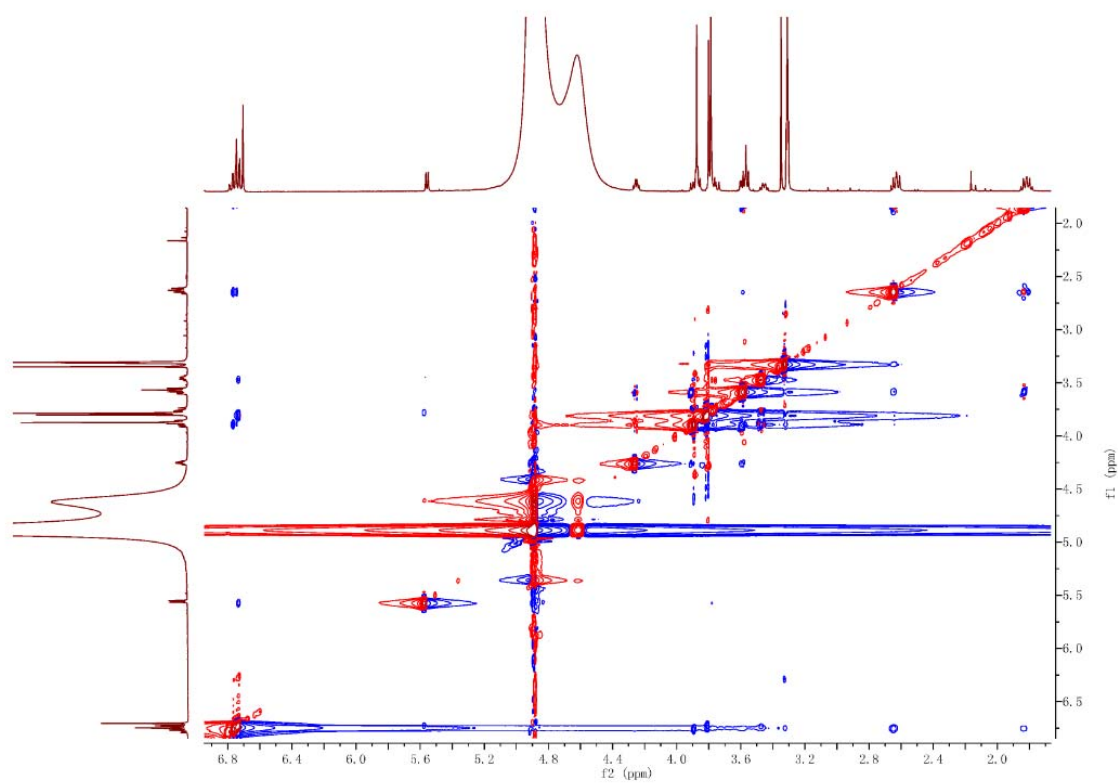

## <sup>1</sup>H NMR of compound 8 in Acetone-*d*<sub>6</sub> (400 MHz)

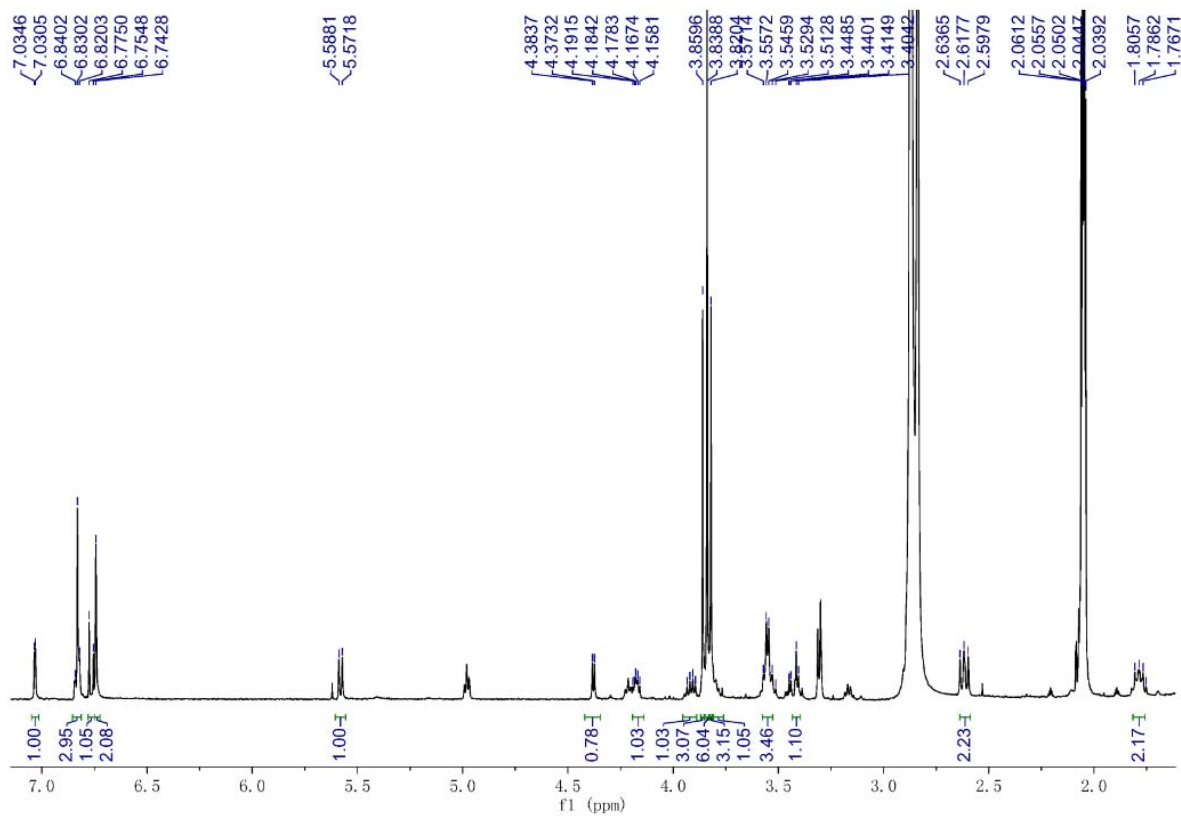

## Chiral HPLC separation profiles of 1a/1b–8a/8b

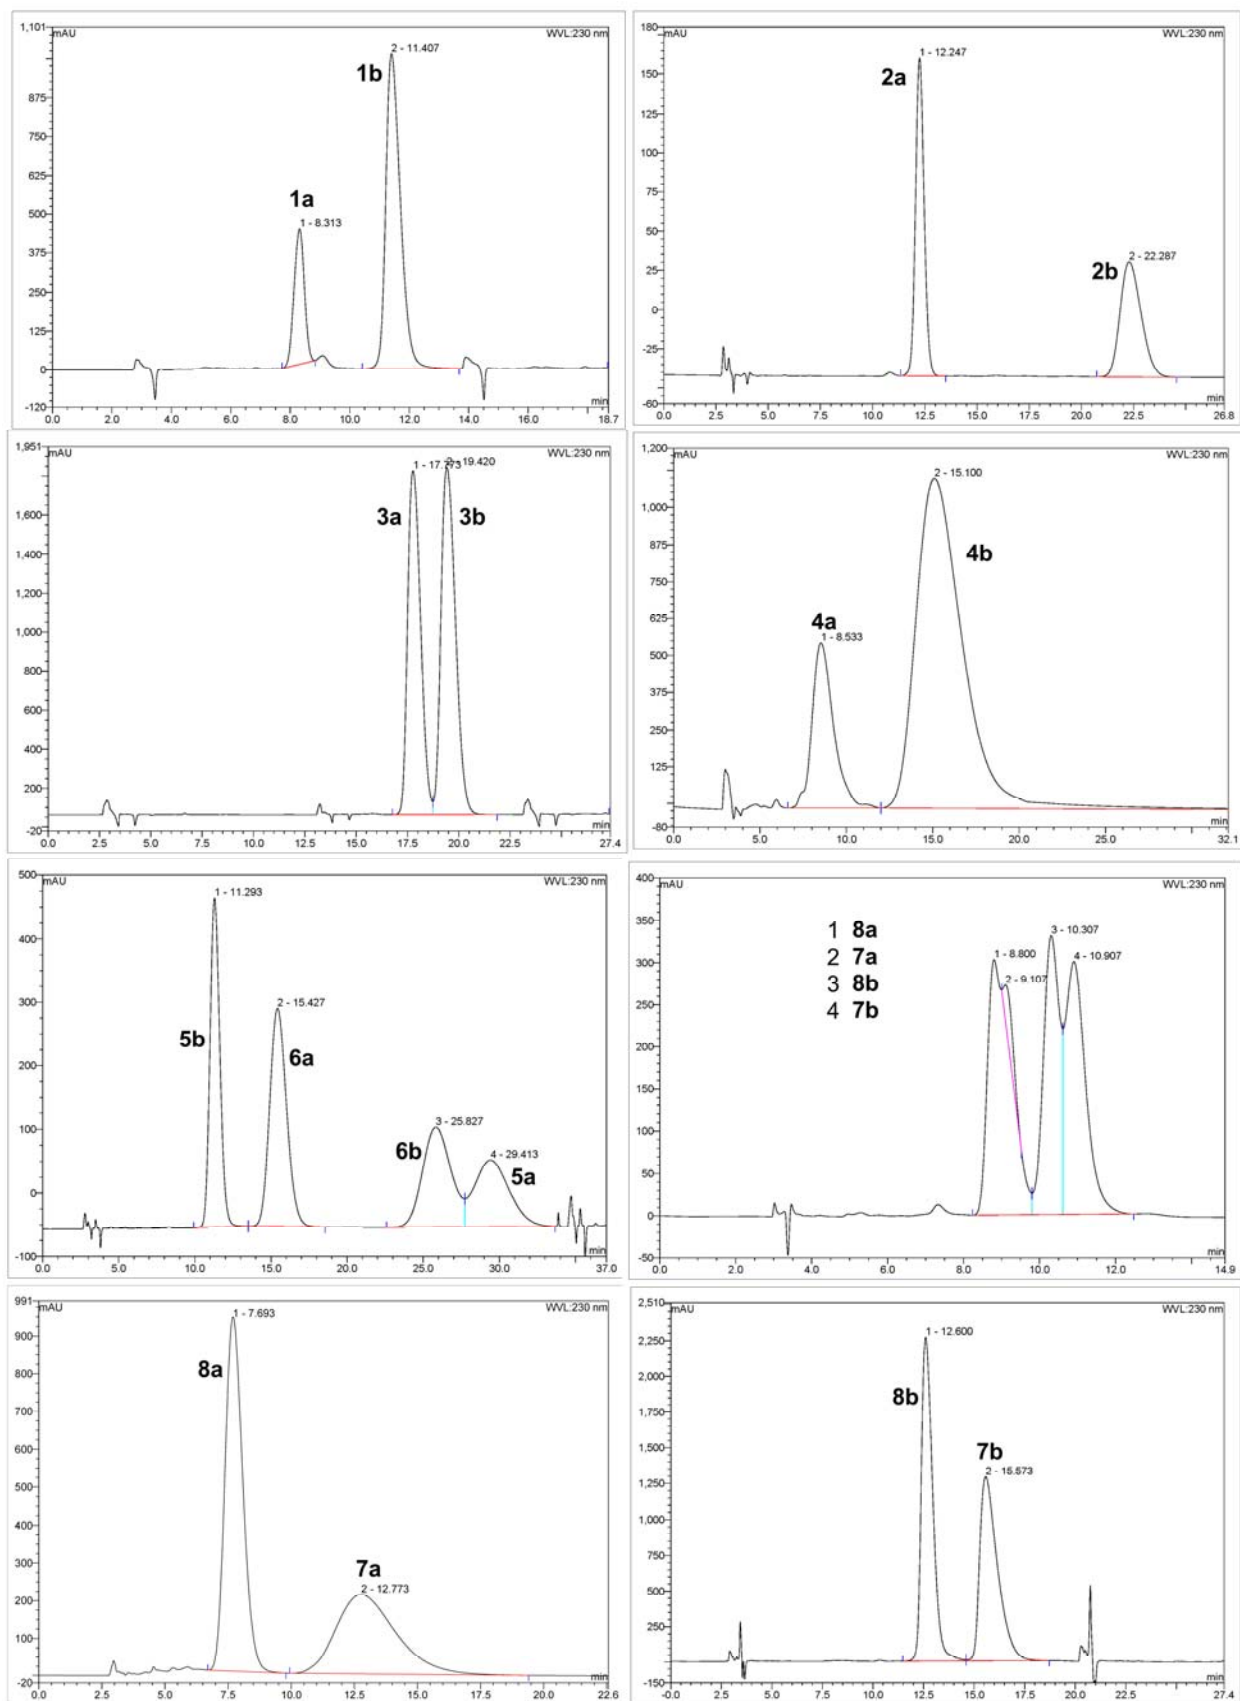

Supplement: srep24809-s1.pdf [file srep24809-s1.pdf]
